# Supplementary material for: Bioactive Abietane-Type Diterpenoid Glycosides from Leaves of Clerodendrum infortunatum (Lamiaceae)
Source: MDPI journal article supplement (doi:10.3390/molecules26144121), 2021-07-06
Supplement: s1 [file s1]

## Supplementary Materials

### Bioactive abietane-type diterpenoid glycosides from leaves of *Clerodendrum infortunatum* (Lamiaceae)

Md. Josim Uddin<sup>1,2</sup>, Daniela Russo<sup>3,4</sup>, Md. Anwarul Haque<sup>5,6</sup>, Serhat Sezai Çiçek<sup>1</sup>, Frank D. Sönnichsen<sup>7</sup>, Luigi Milella<sup>3</sup>, and Christian Zidorn<sup>1,\*</sup>

- 1 Pharmazeutisches Institut, Abteilung Pharmazeutische Biologie, Christian-Albrechts-Universität zu Kiel, Gutenbergstrasse 76, 24118 Kiel, Germany; juddin@pharmazie.uni-kiel.de; scicek@pharmazie.uni-kiel.de
- 2 Department of Pharmacy, International Islamic University Chittagong, Chittagong-4318, Bangladesh
- 3 Department of Science, University of Basilicata, Viale dell' Ateneo Lucano 10, 85100 Potenza, Italy; daiela.russo@unibas.it; luigi.milella@unibas.it
- 4 Spinoff BioActiPlant s.r.l., Viale dell' Ateneo Lucano 10, 85100 Potenza, Italy
- 5 Department of Experimental Pathology, Graduate School of Comprehensive Human Sciences, University of Tsukuba, Ibaraki 305-8575, Japan; a.haque5314@gmail.com
- 6 Department of Pharmacy, University of Rajshahi, Rajshahi-6205, Bangladesh
- 7 Otto Diels Institute for Organic Chemistry, University of Kiel, Otto-Hahn-Platz 4, 24118 Kiel, Germany; fsoennichsen@oc.uni-kiel.de

#### Corresponding Author

\*Christian Zidorn: Pharmazeutisches Institut, Abteilung Pharmazeutische Biologie,  
Christian-Albrechts-Universität zu Kiel, Gutenbergstraße 76, 24118 Kiel, Germany. Tel.:  
+49-431-880-1139. E-mail: czidorn@pharmazie.uni-kiel.de

| <b>List of contents</b>                                                                                                                                                        |             |
|--------------------------------------------------------------------------------------------------------------------------------------------------------------------------------|-------------|
| <b>Content</b>                                                                                                                                                                 | <b>Page</b> |
| Figure S1-A. 1D- <sup>1</sup> H NMR (600 MHz) spectrum of compound <b>1</b> in Methanol- <i>d</i> <sub>4</sub> .                                                               | 3           |
| Figure S1-B. 1D- <sup>1</sup> H NMR (600 MHz) spectrum of compound <b>1</b> in DMSO- <i>d</i> <sub>6</sub> .                                                                   | 4           |
| Figure S2-A. 1D- <sup>13</sup> C NMR (150 MHz) spectrum of compound <b>1</b> in Methanol- <i>d</i> <sub>4</sub> .                                                              | 5           |
| Figure S2-B. 1D- <sup>13</sup> C NMR (150 MHz) spectrum of compound <b>1</b> in DMSO- <i>d</i> <sub>6</sub> .                                                                  | 6           |
| Figure S3-A. COSY spectrum of compound <b>1</b> in Methanol- <i>d</i> <sub>4</sub> .                                                                                           | 7           |
| Figure S3-B. COSY spectrum of compound <b>1</b> in DMSO- <i>d</i> <sub>6</sub> .                                                                                               | 8           |
| Figure S4-A. HSQC spectrum of compound <b>1</b> in Methanol- <i>d</i> <sub>4</sub> .                                                                                           | 9           |
| Figure S4-B. HSQC spectrum of compound <b>1</b> in DMSO- <i>d</i> <sub>6</sub> .                                                                                               | 10          |
| Figure S5-A. HMBC spectrum of compound <b>1</b> in Methanol- <i>d</i> <sub>4</sub> .                                                                                           | 11          |
| Figure S5-B. HMBC spectrum of compound <b>1</b> in DMSO- <i>d</i> <sub>6</sub> .                                                                                               | 12          |
| Figure S6. HR mass spectrum of compound <b>1</b> in methanol.                                                                                                                  | 13          |
| Figure S7-A. 1D- <sup>1</sup> H NMR (600 MHz) spectrum of compound <b>2</b> in Methanol- <i>d</i> <sub>4</sub> .                                                               | 14          |
| Figure S7-B. 1D- <sup>1</sup> H NMR (600 MHz) spectrum of compound <b>2</b> in DMSO- <i>d</i> <sub>6</sub> .                                                                   | 15          |
| Figure S7-C. 1D- <sup>1</sup> H NMR (600 MHz) spectrum of compound <b>2</b> in D <sub>2</sub> O.                                                                               | 16          |
| Figure S8-A. 1D- <sup>13</sup> C NMR (150 MHz) spectrum of compound <b>2</b> in Methanol- <i>d</i> <sub>4</sub> .                                                              | 17          |
| Figure S8-B. 1D- <sup>13</sup> C NMR (150 MHz) spectrum of compound <b>2</b> in DMSO- <i>d</i> <sub>6</sub> .                                                                  | 18          |
| Figure S8-C. 1D- <sup>13</sup> C NMR (150 MHz) spectrum of compound <b>2</b> in D <sub>2</sub> O.                                                                              | 19          |
| Figure S9-A. COSY spectrum of compound <b>2</b> in Methanol- <i>d</i> <sub>4</sub> .                                                                                           | 20          |
| Figure S9-B. COSY spectrum of compound <b>2</b> in DMSO- <i>d</i> <sub>6</sub> .                                                                                               | 21          |
| Figure S9-C. COSY spectrum of compound <b>2</b> in D <sub>2</sub> O.                                                                                                           | 22          |
| Figure S10-A. HSQC spectrum of compound <b>2</b> in Methanol- <i>d</i> <sub>4</sub> .                                                                                          | 23          |
| Figure S10-B. HSQC spectrum of compound <b>2</b> in DMSO- <i>d</i> <sub>6</sub> .                                                                                              | 24          |
| Figure S10-C. HSQC spectrum of compound <b>2</b> in D <sub>2</sub> O.                                                                                                          | 25          |
| Figure S11-A. HMBC spectrum of compound <b>2</b> in Methanol- <i>d</i> <sub>4</sub> .                                                                                          | 26          |
| Figure S11-B. HMBC spectrum of compound <b>2</b> in DMSO- <i>d</i> <sub>6</sub> .                                                                                              | 27          |
| Figure S11-C. HMBC spectrum of compound <b>2</b> in D <sub>2</sub> O.                                                                                                          | 28          |
| Figure S12. HR mass spectrum of compound <b>2</b> in methanol.                                                                                                                 | 29          |
| Figure S13. HR mass spectrum of compound <b>3</b> in methanol.                                                                                                                 | 30          |
| Figure S14. UHPLC (λ = 330 nm) chromatogram of <i>n</i> -butanol fraction from leaves of <i>Clerodendrum infortunatum</i>                                                      | 31          |
| Table S1. 1D ( <sup>1</sup> H, 600 MHz and <sup>13</sup> C, 150 MHz) NMR spectroscopic data for compound <b>3</b> in CD <sub>3</sub> OD and (CD <sub>3</sub> ) <sub>2</sub> SO | 32          |

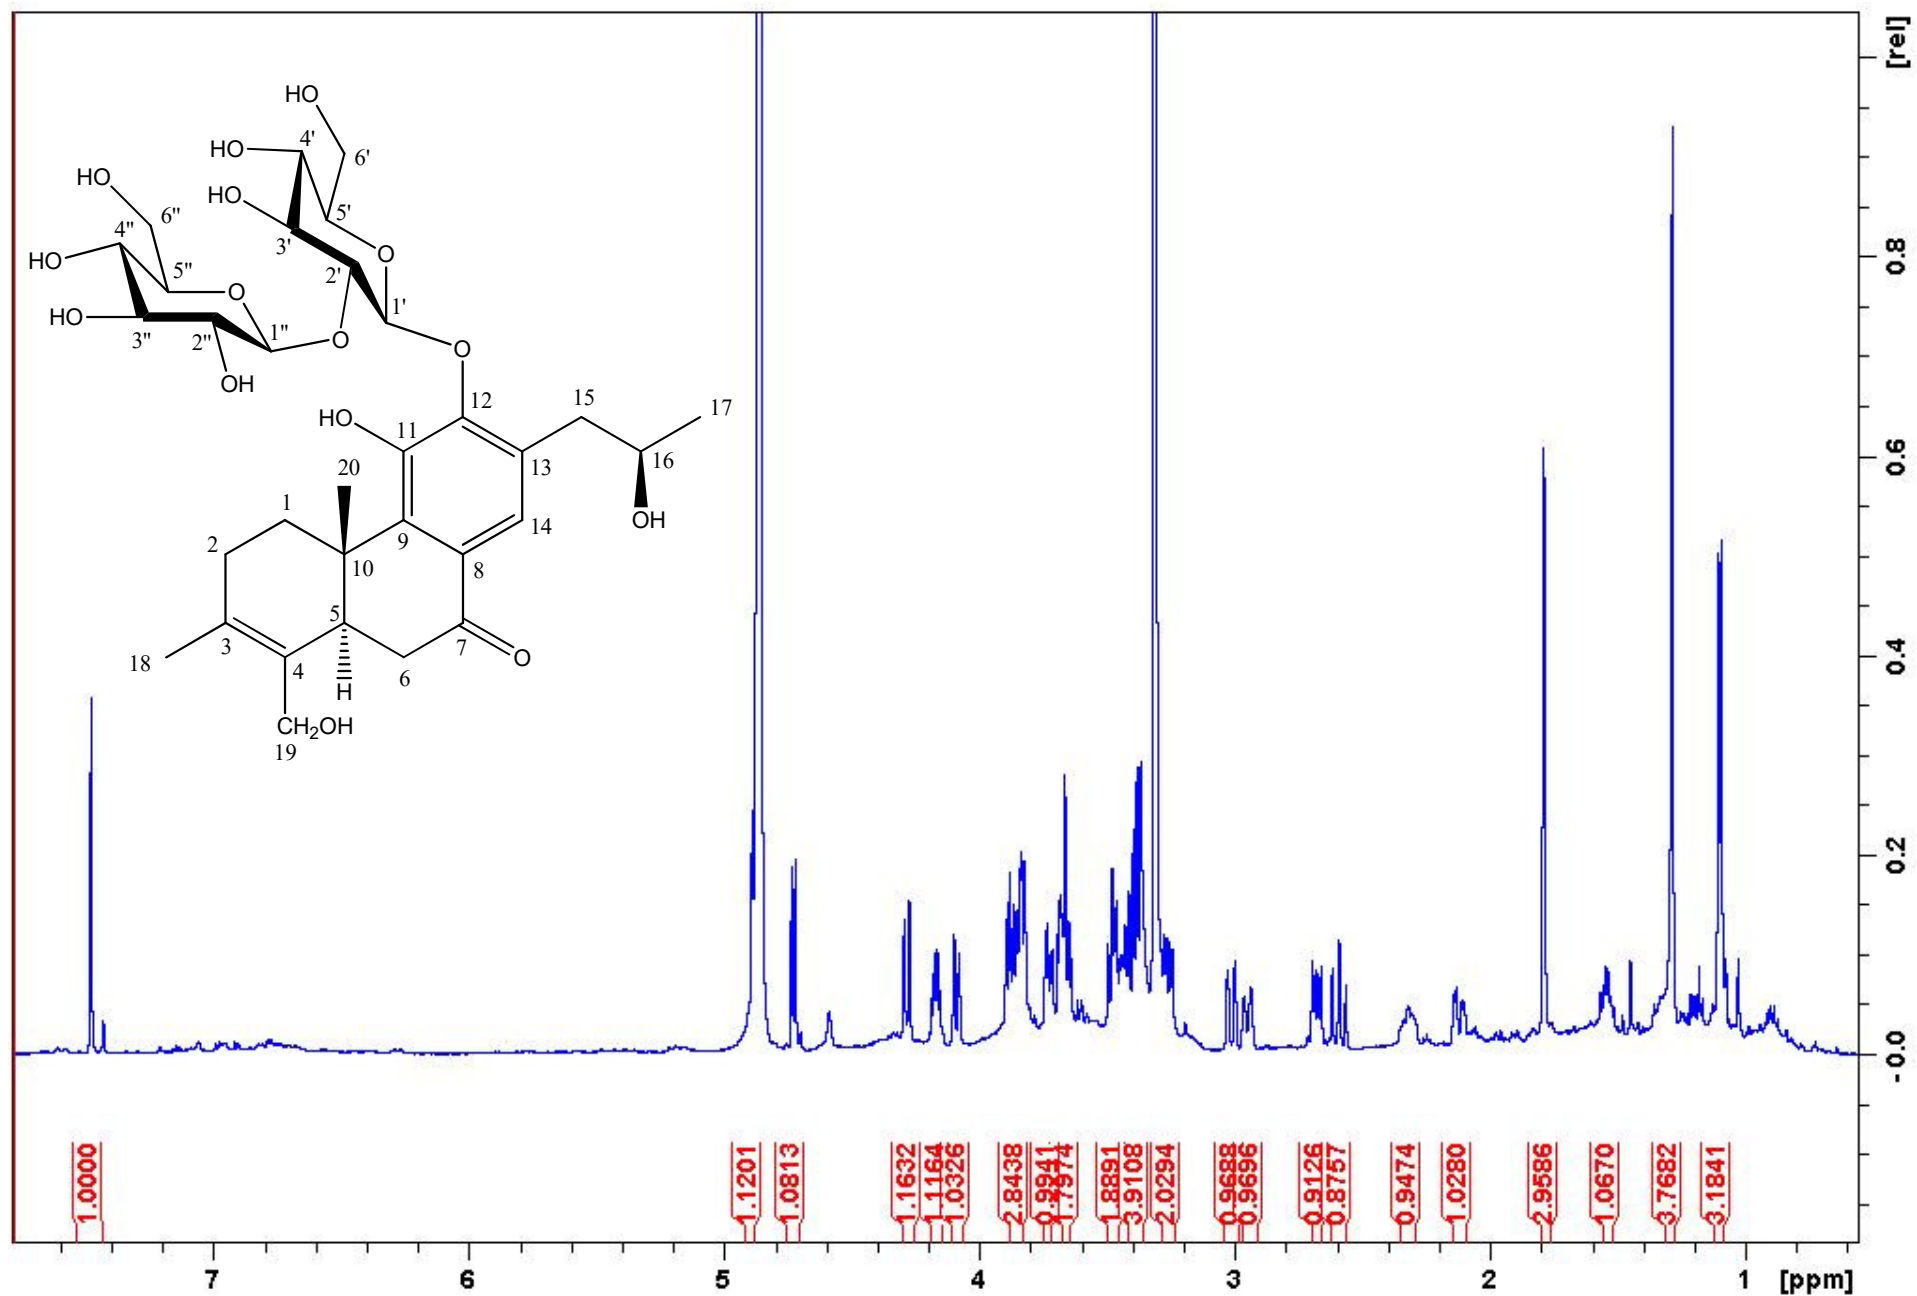

Figure S1-A.  $^1\text{H}$  NMR spectrum of compound **1** in  $\text{Methanol-}d_4$ .

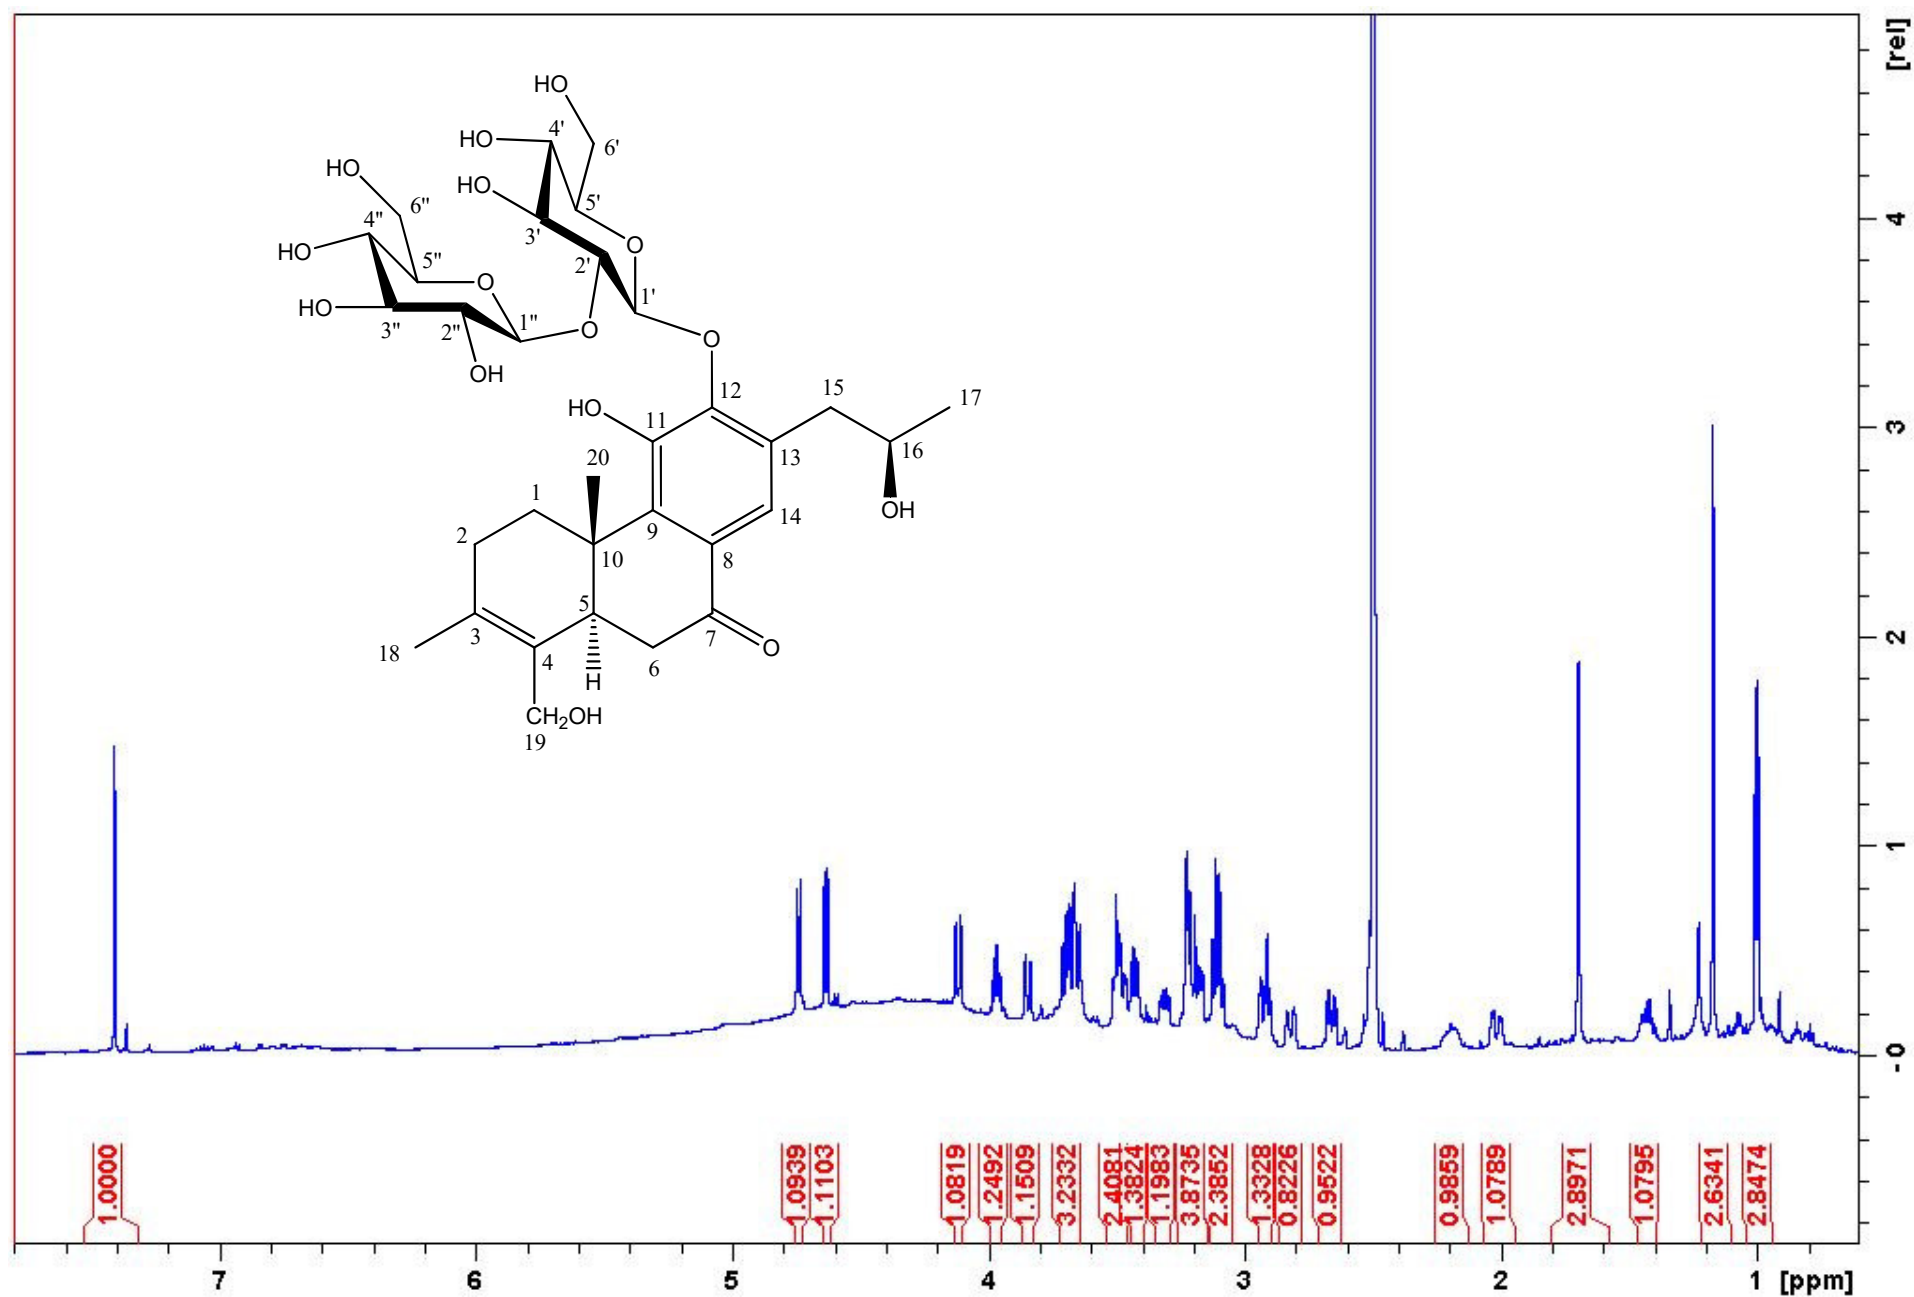

Figure S1-B.  $^1\text{H}$  NMR spectrum of compound 1 in  $\text{DMSO}-d_6$

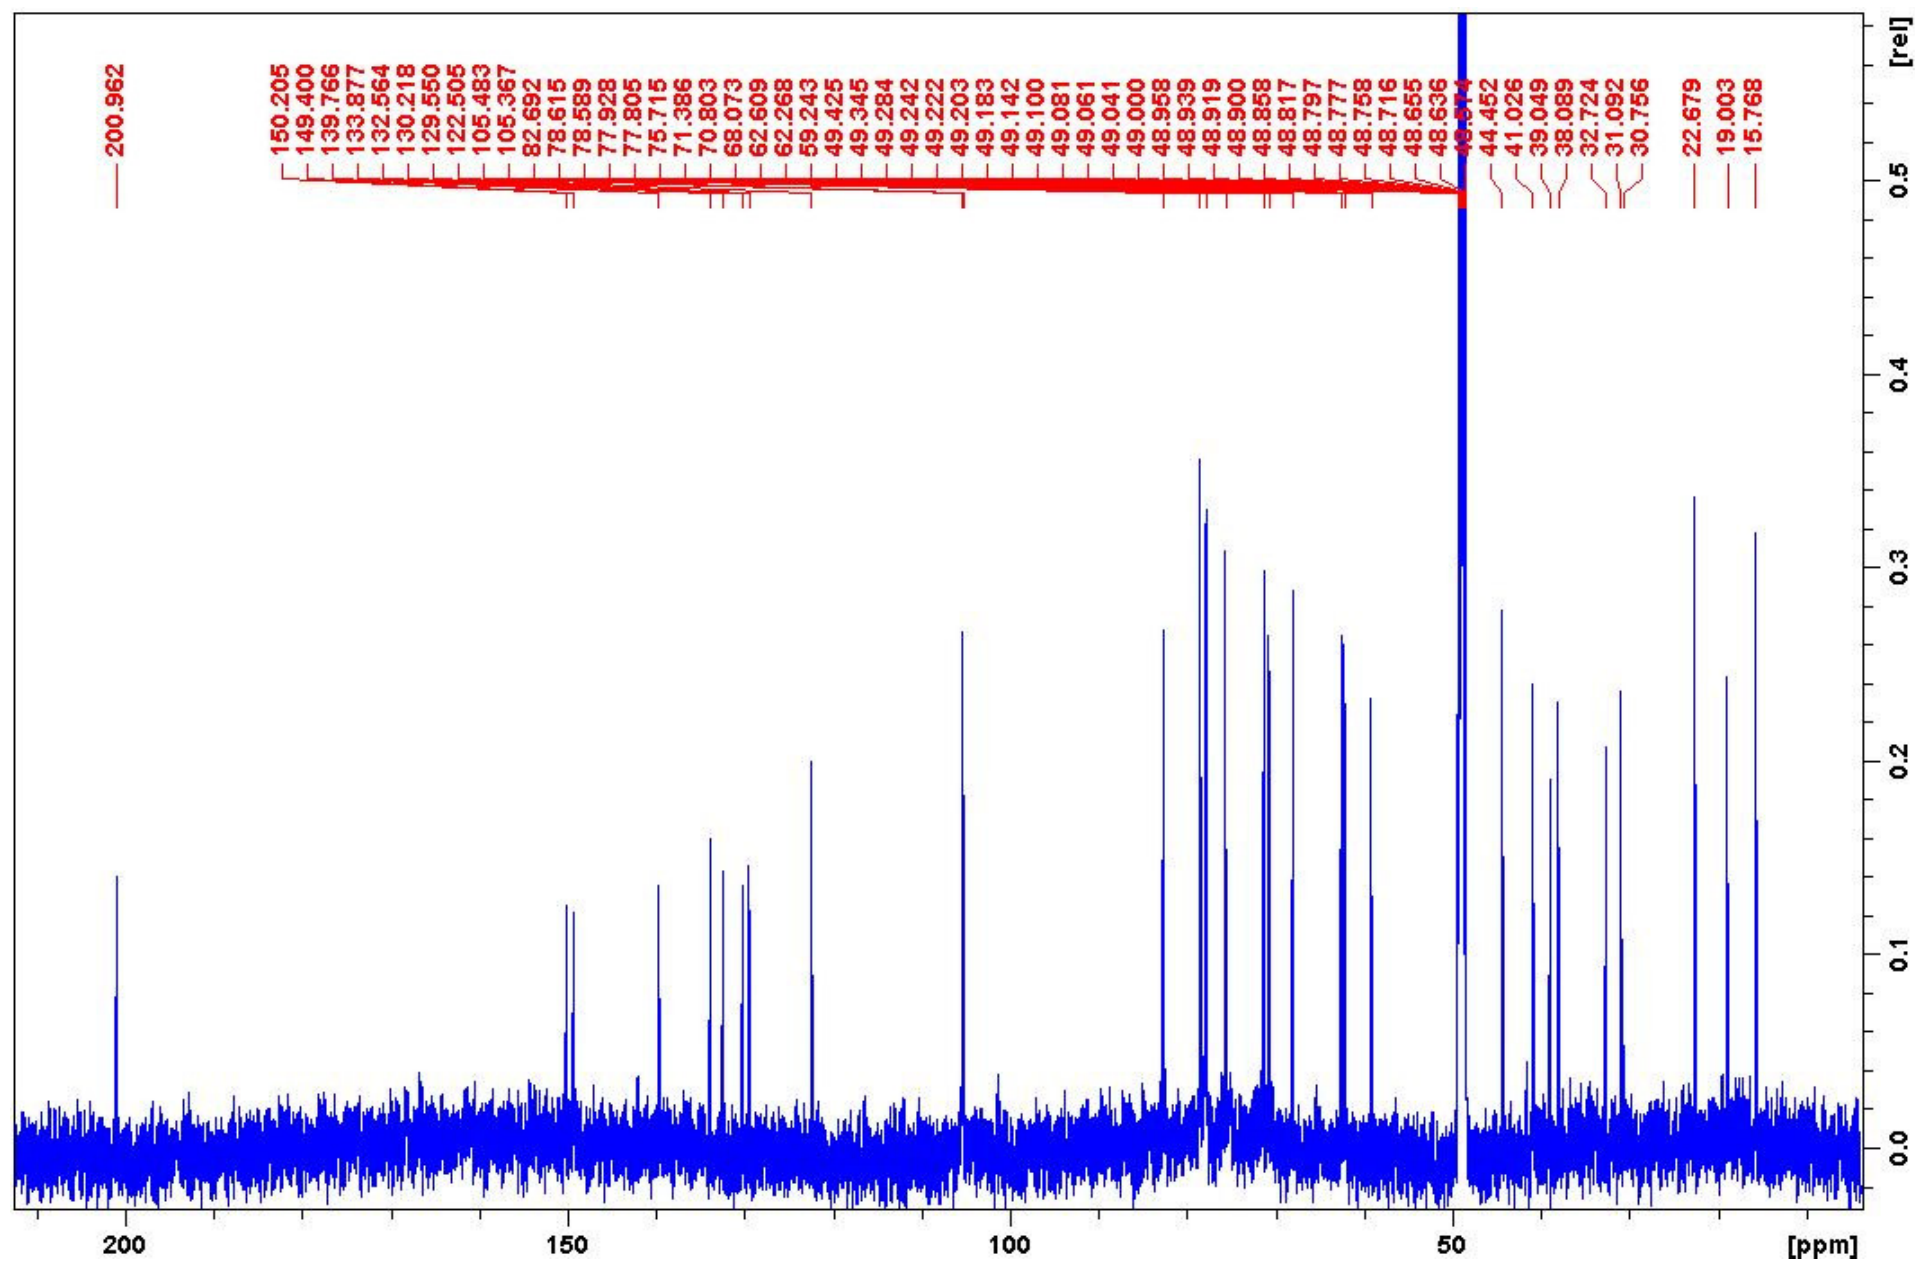

Figure S2-A.  $^{13}\text{C}$  NMR spectrum of compound **1** in Methanol- $d_4$ .

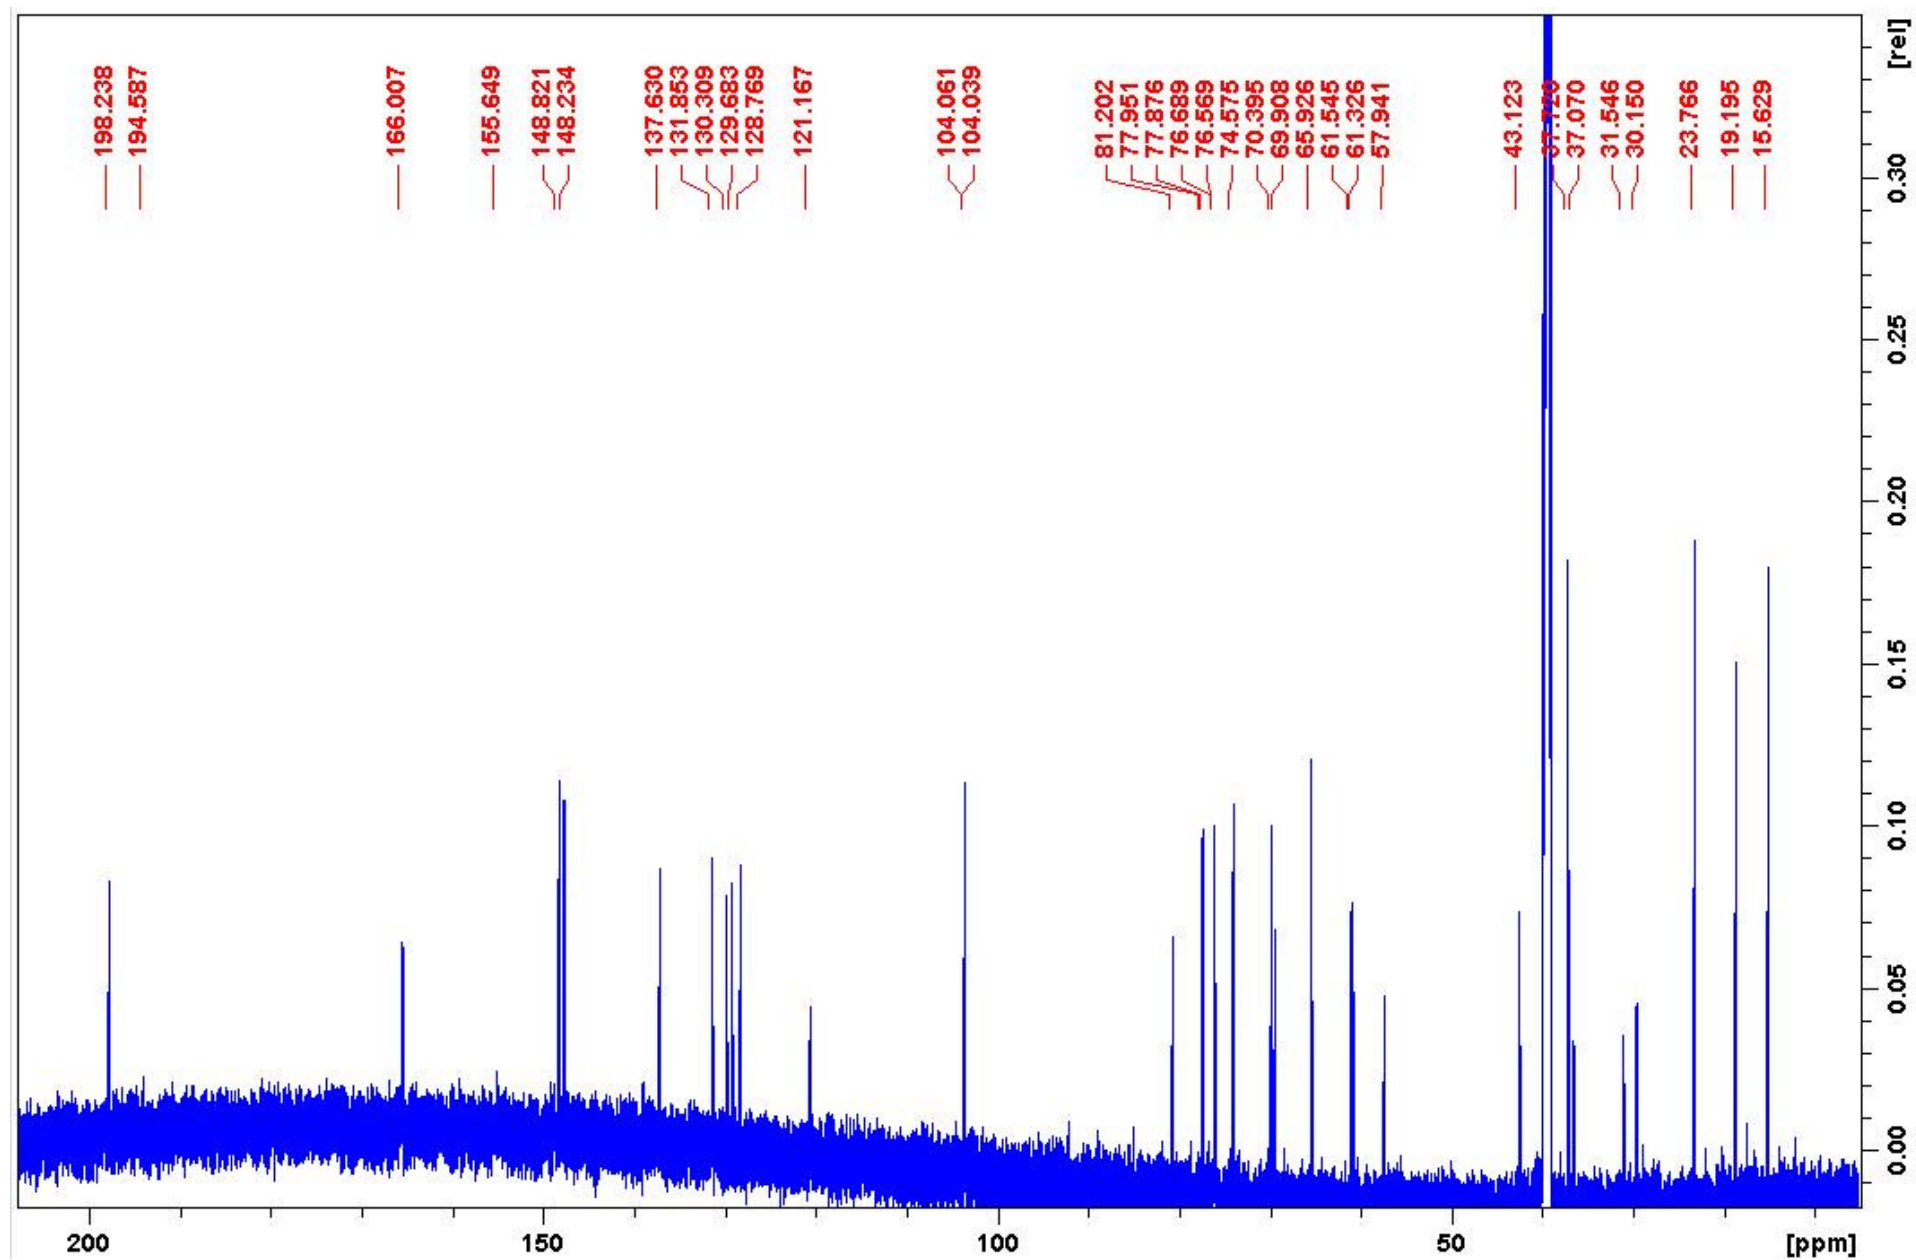

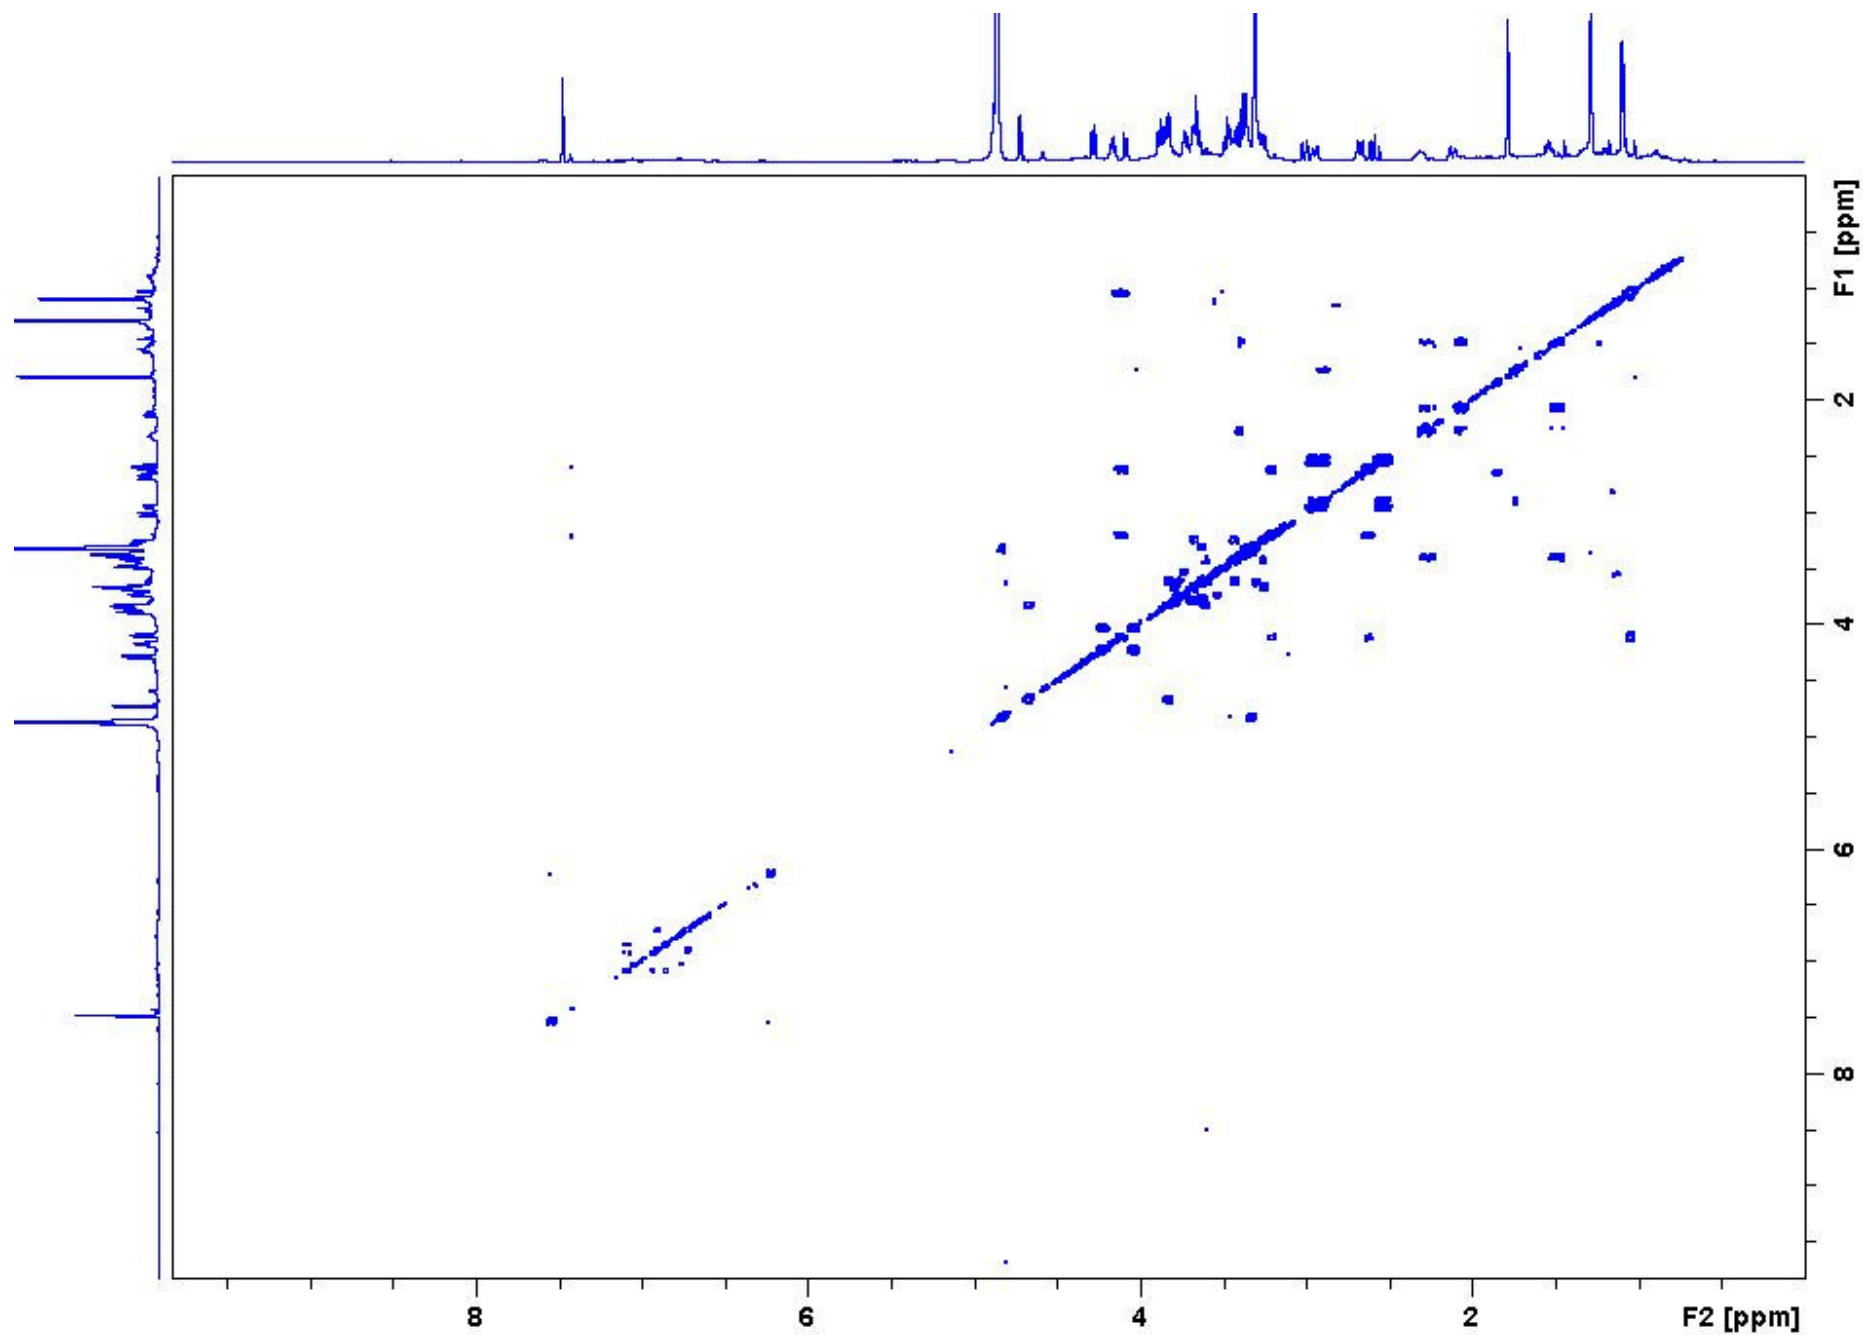

Figure S3-A. COSY spectrum of compound 1 in Methanol- $d_4$ .

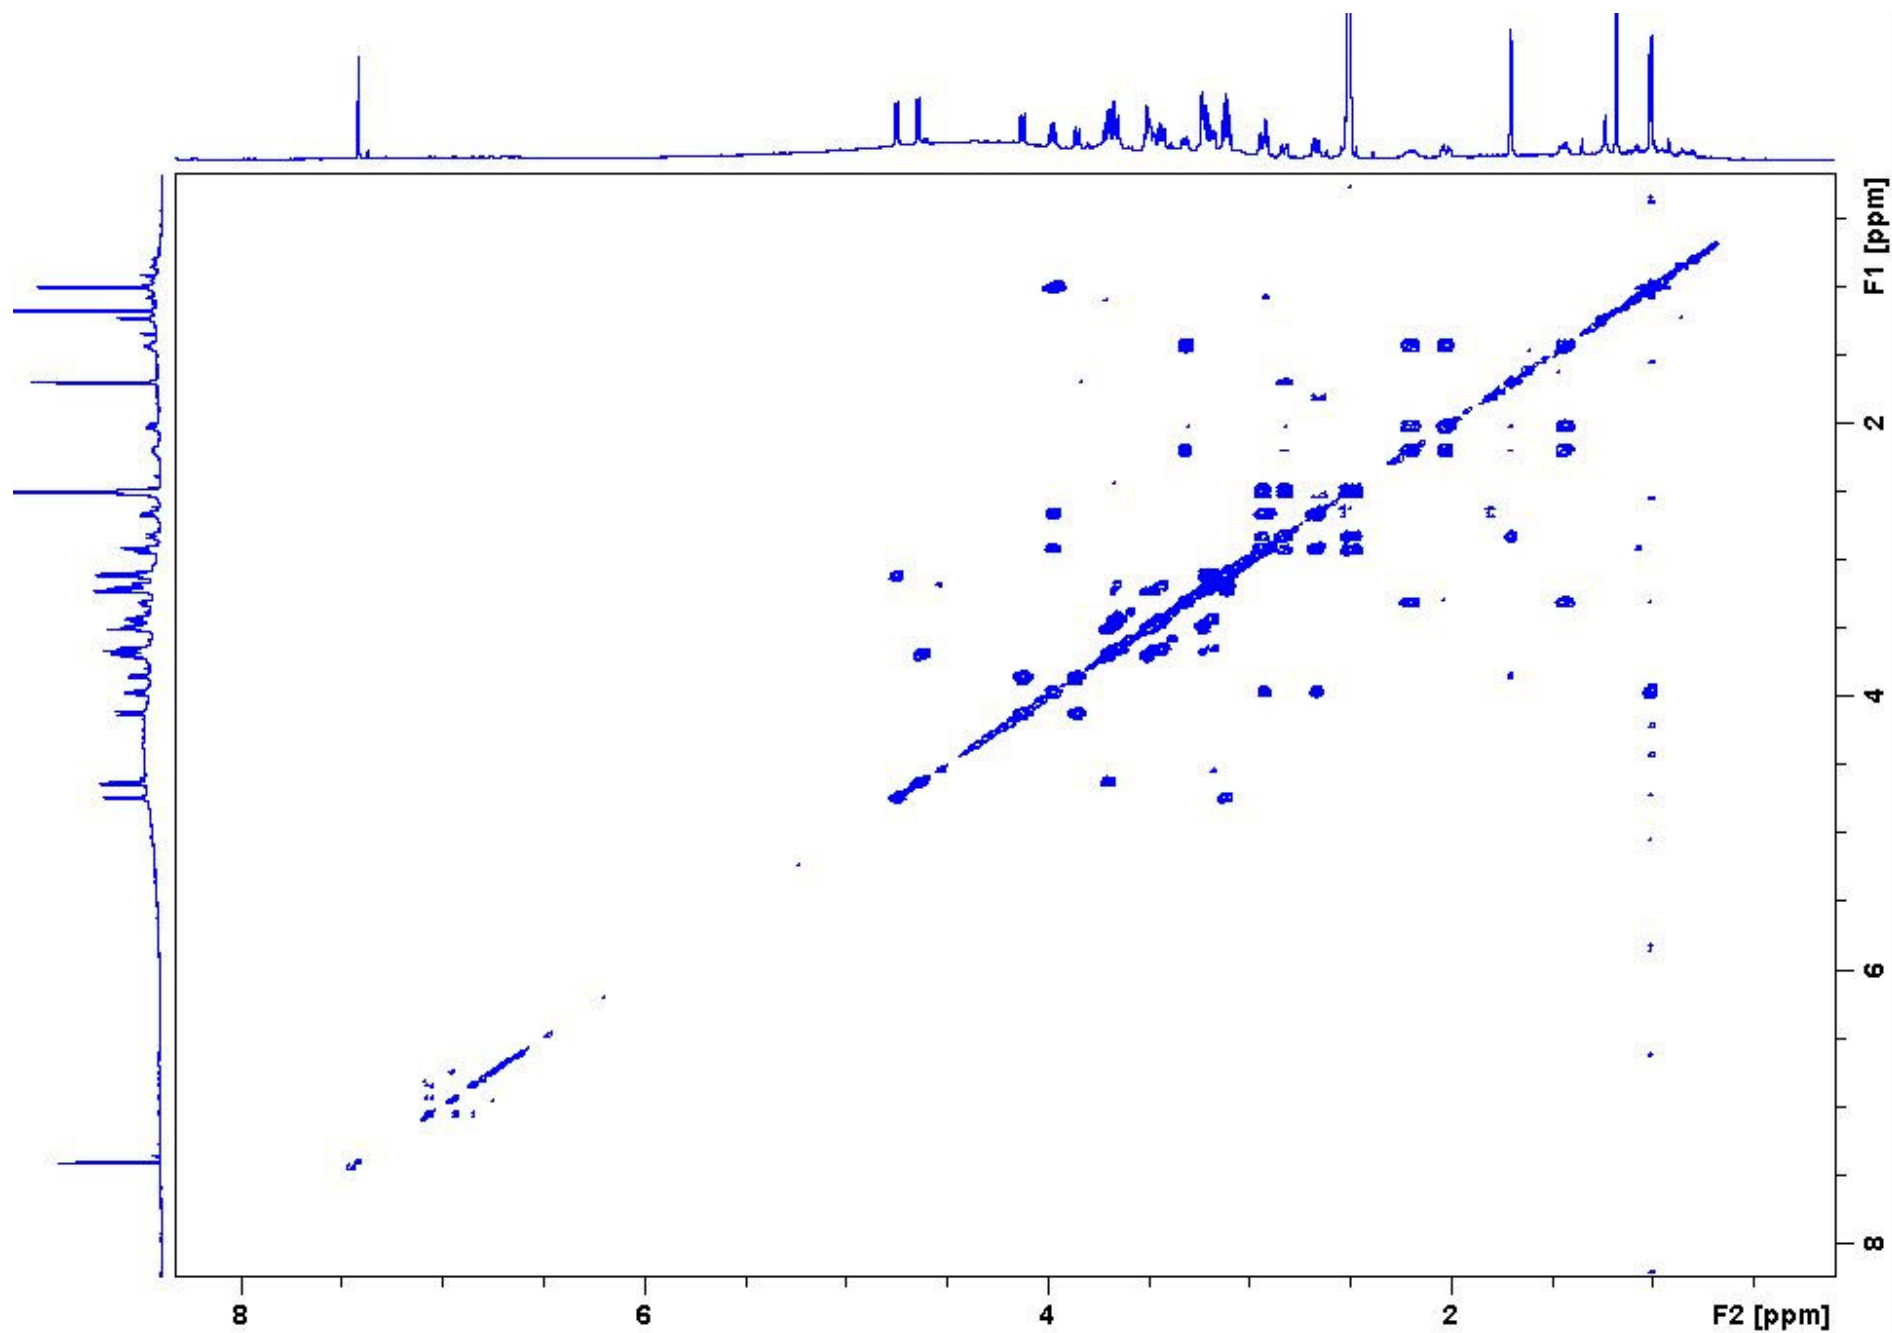

Figure S3-B. COSY spectrum of compound 1 in DMSO- $d_6$ .



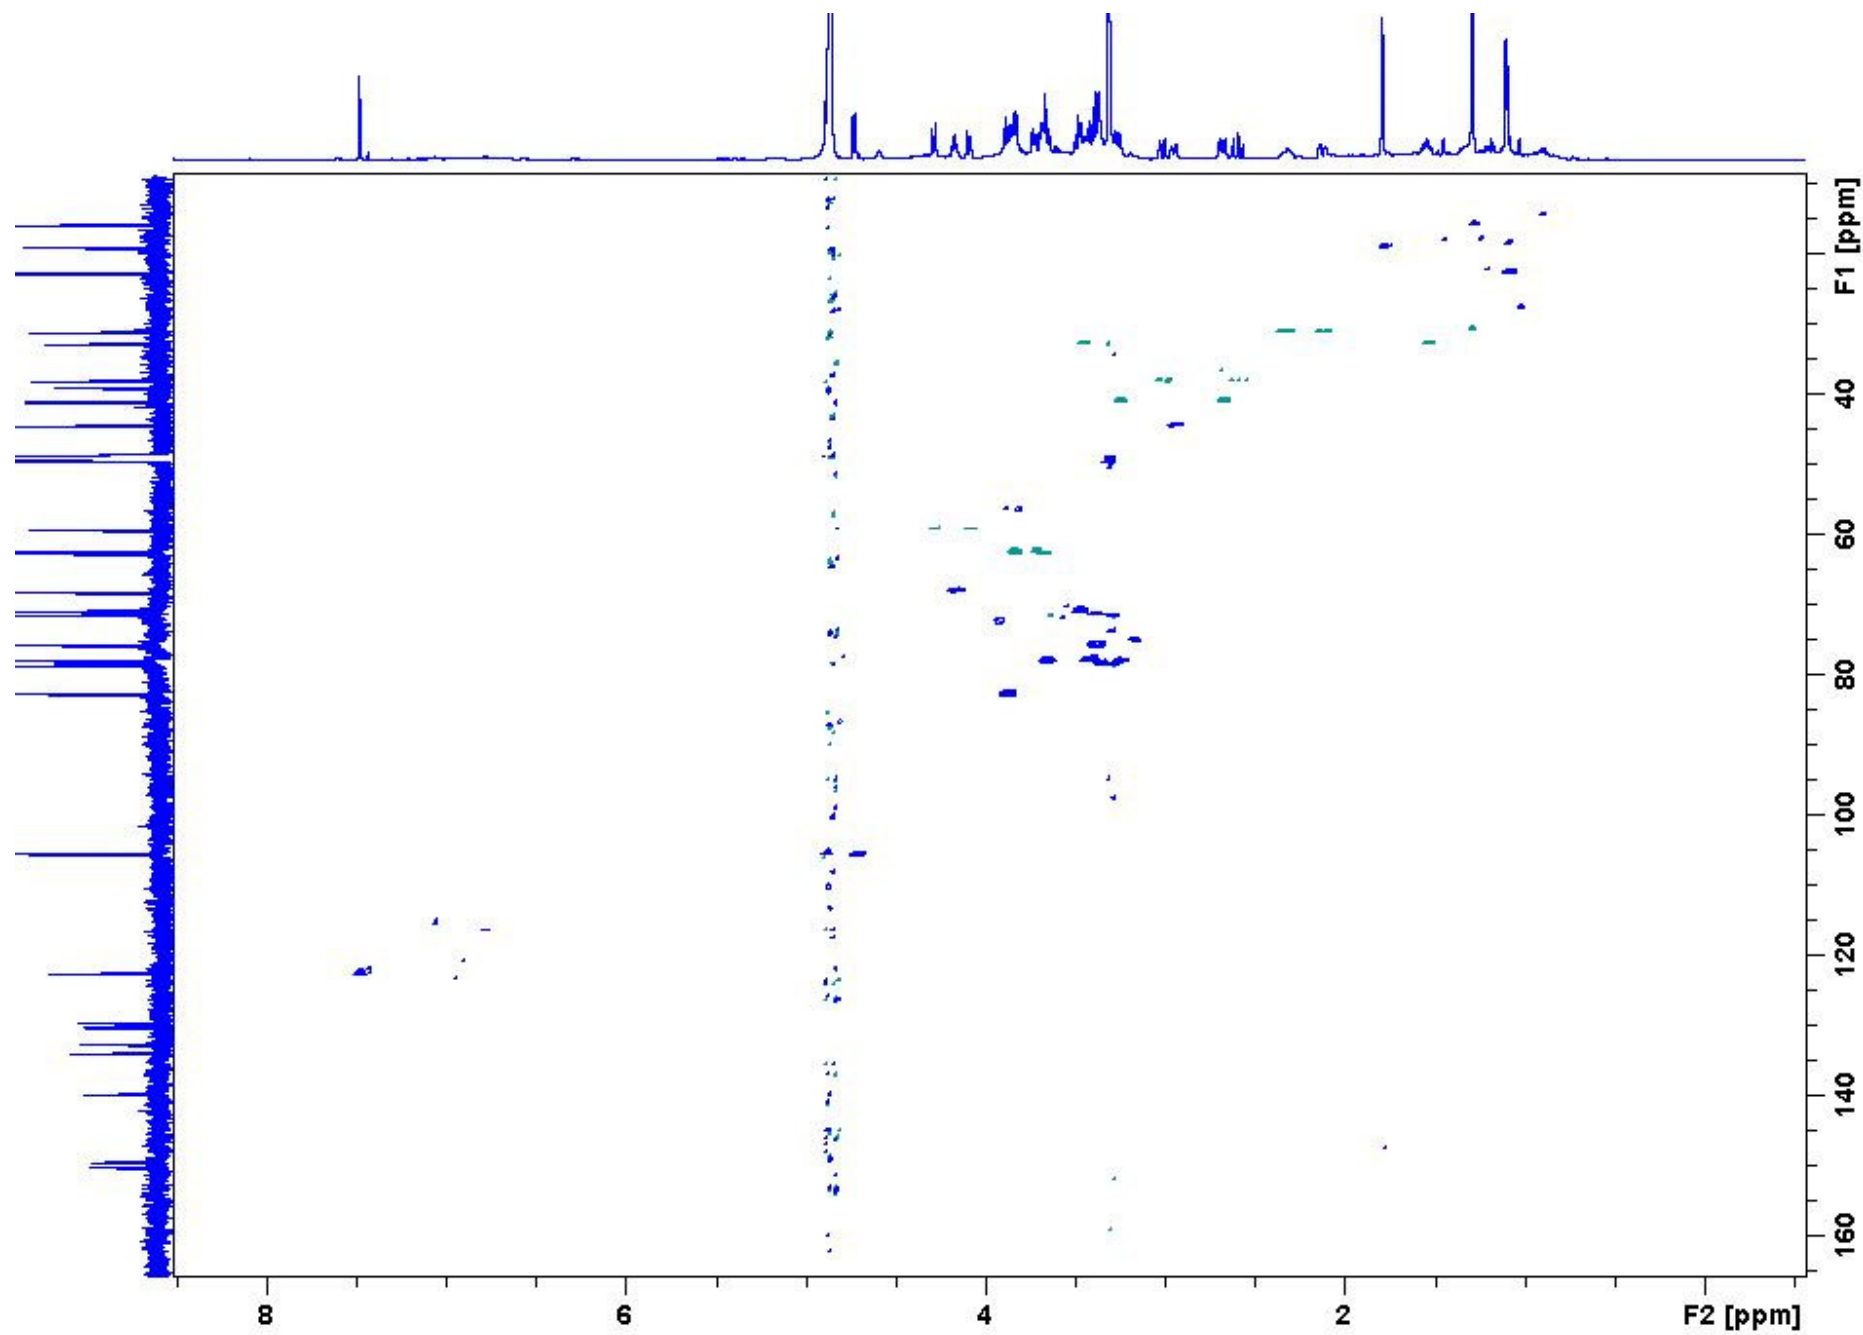

Figure S4-A. HSQC spectrum of compound **1** in Methanol- $d_4$ .

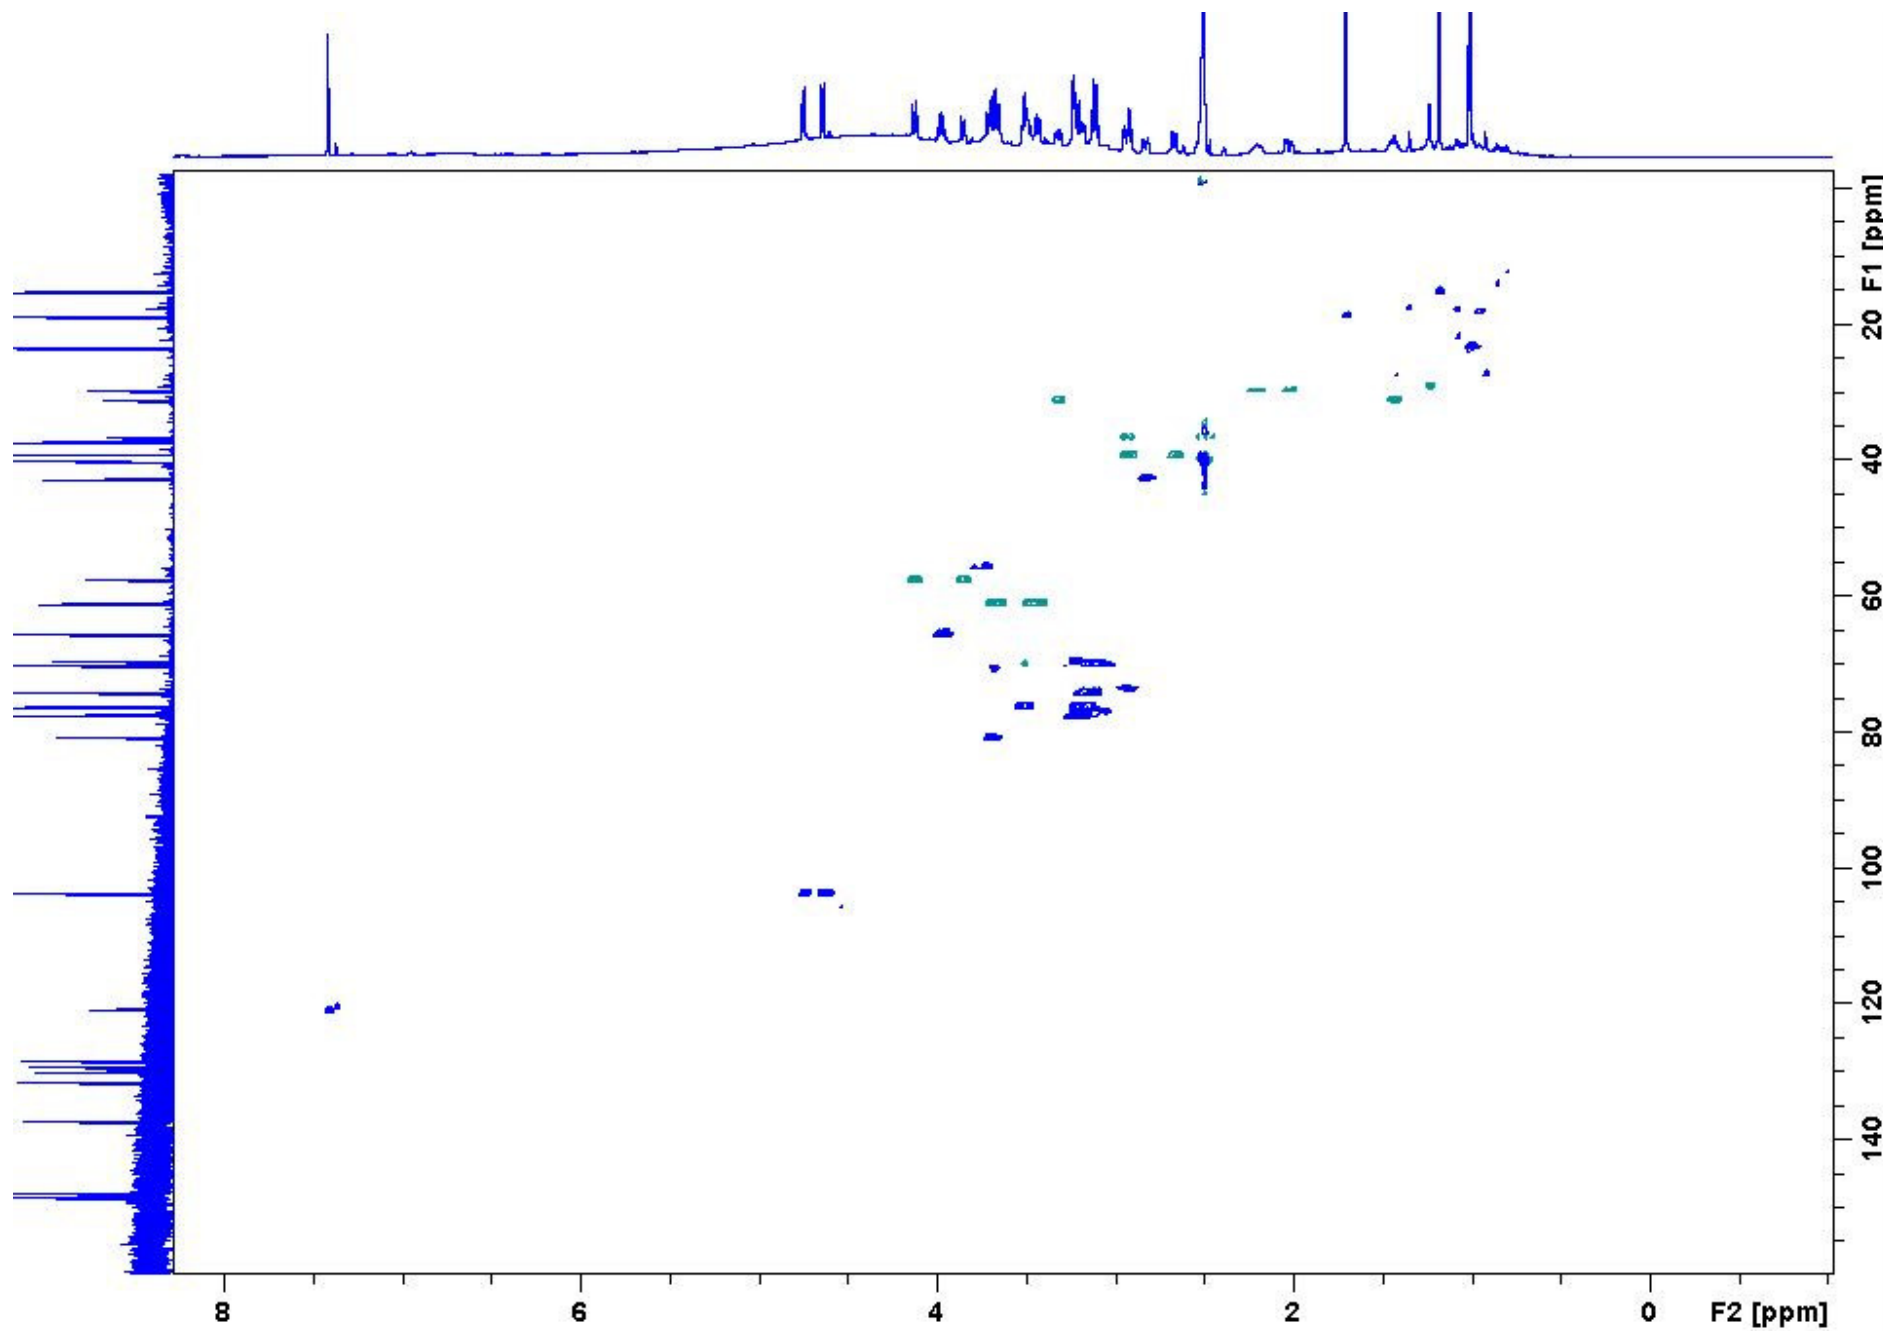

Figure S4-B. HSQC spectrum of compound **1** in DMSO- $d_6$ .

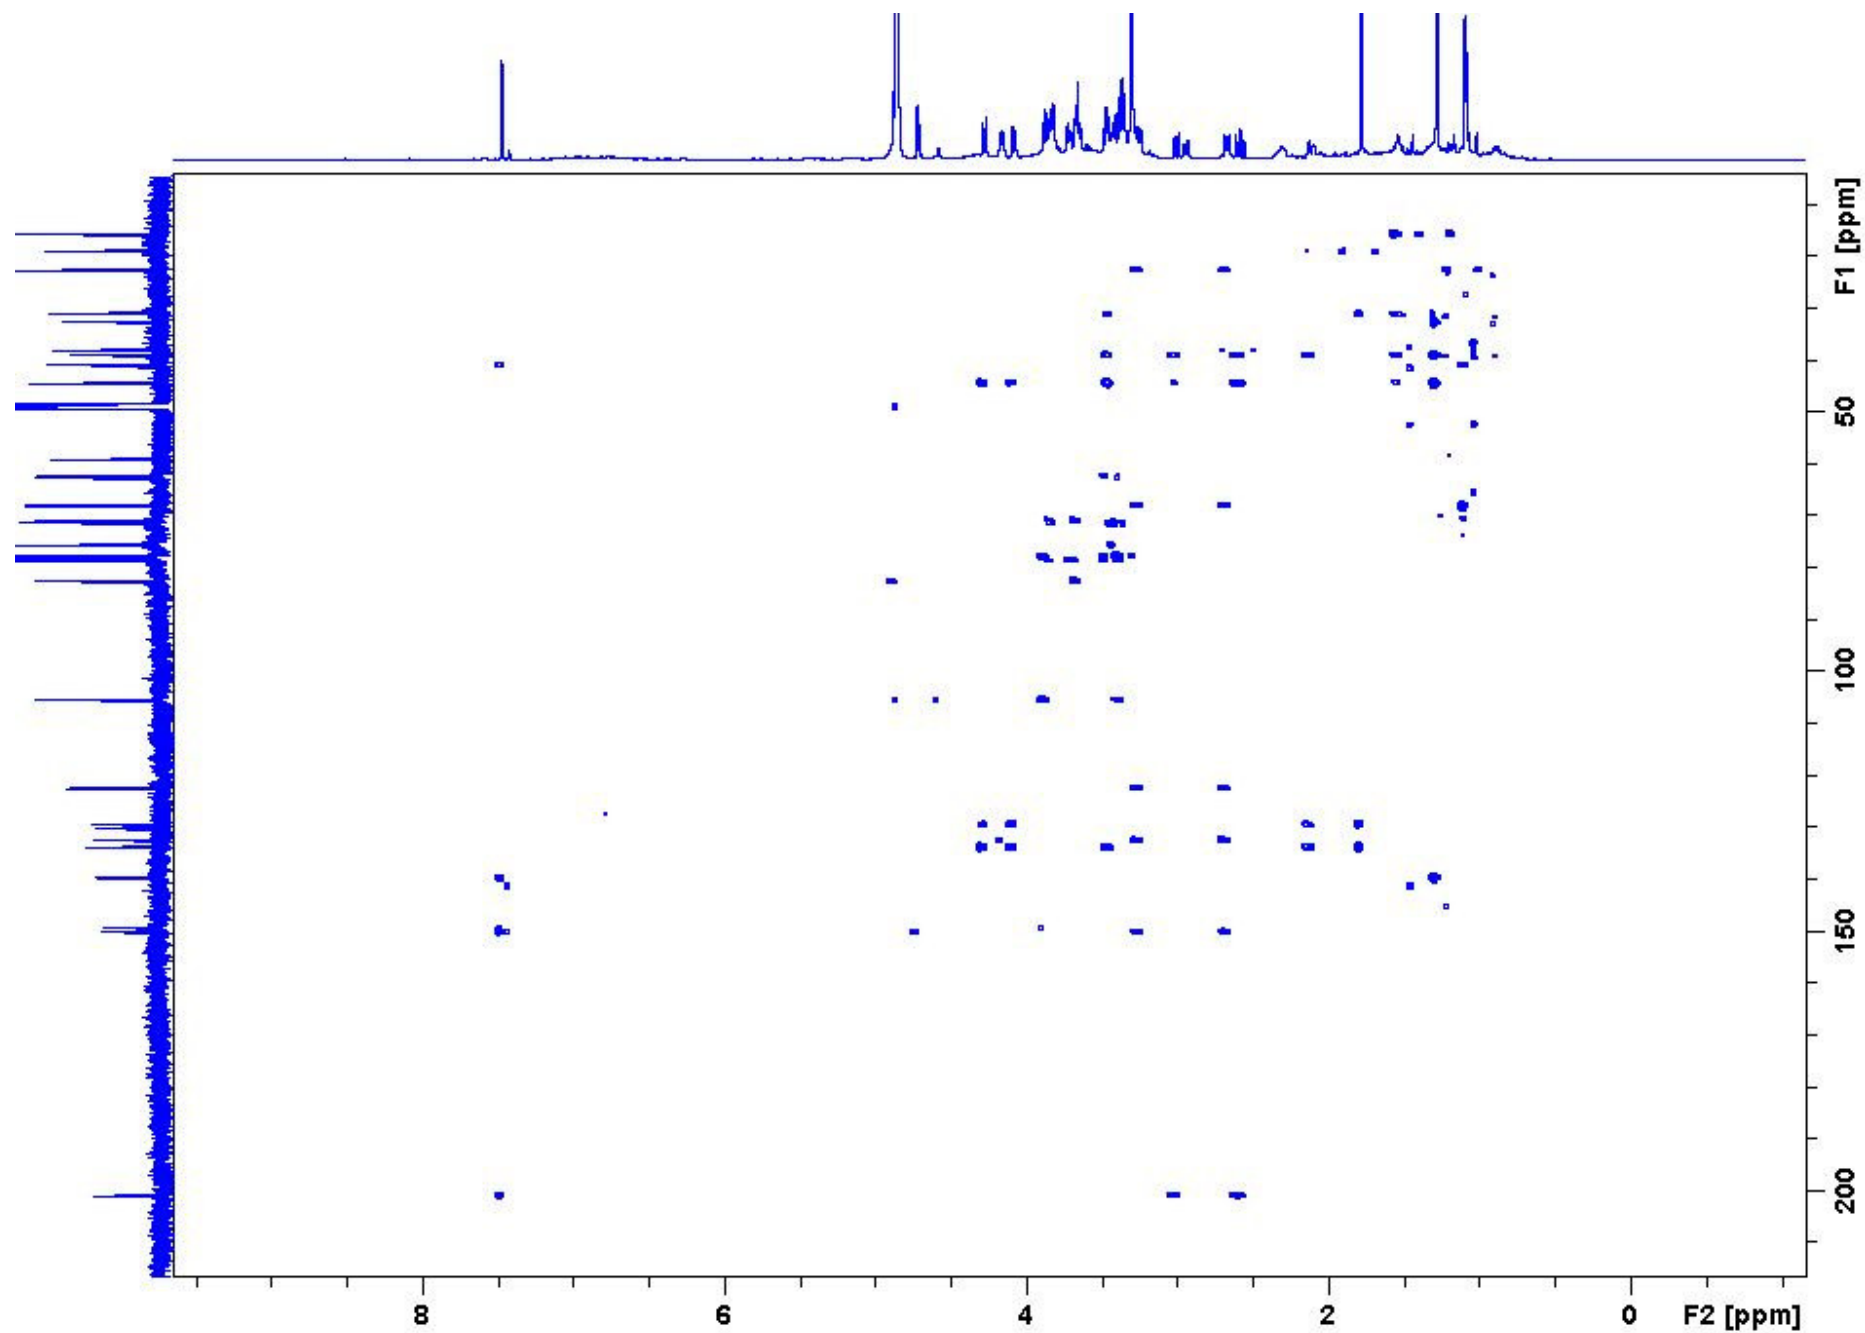

Figure S5-A. HMBC spectrum of compound **1** in Methanol- $d_4$ .

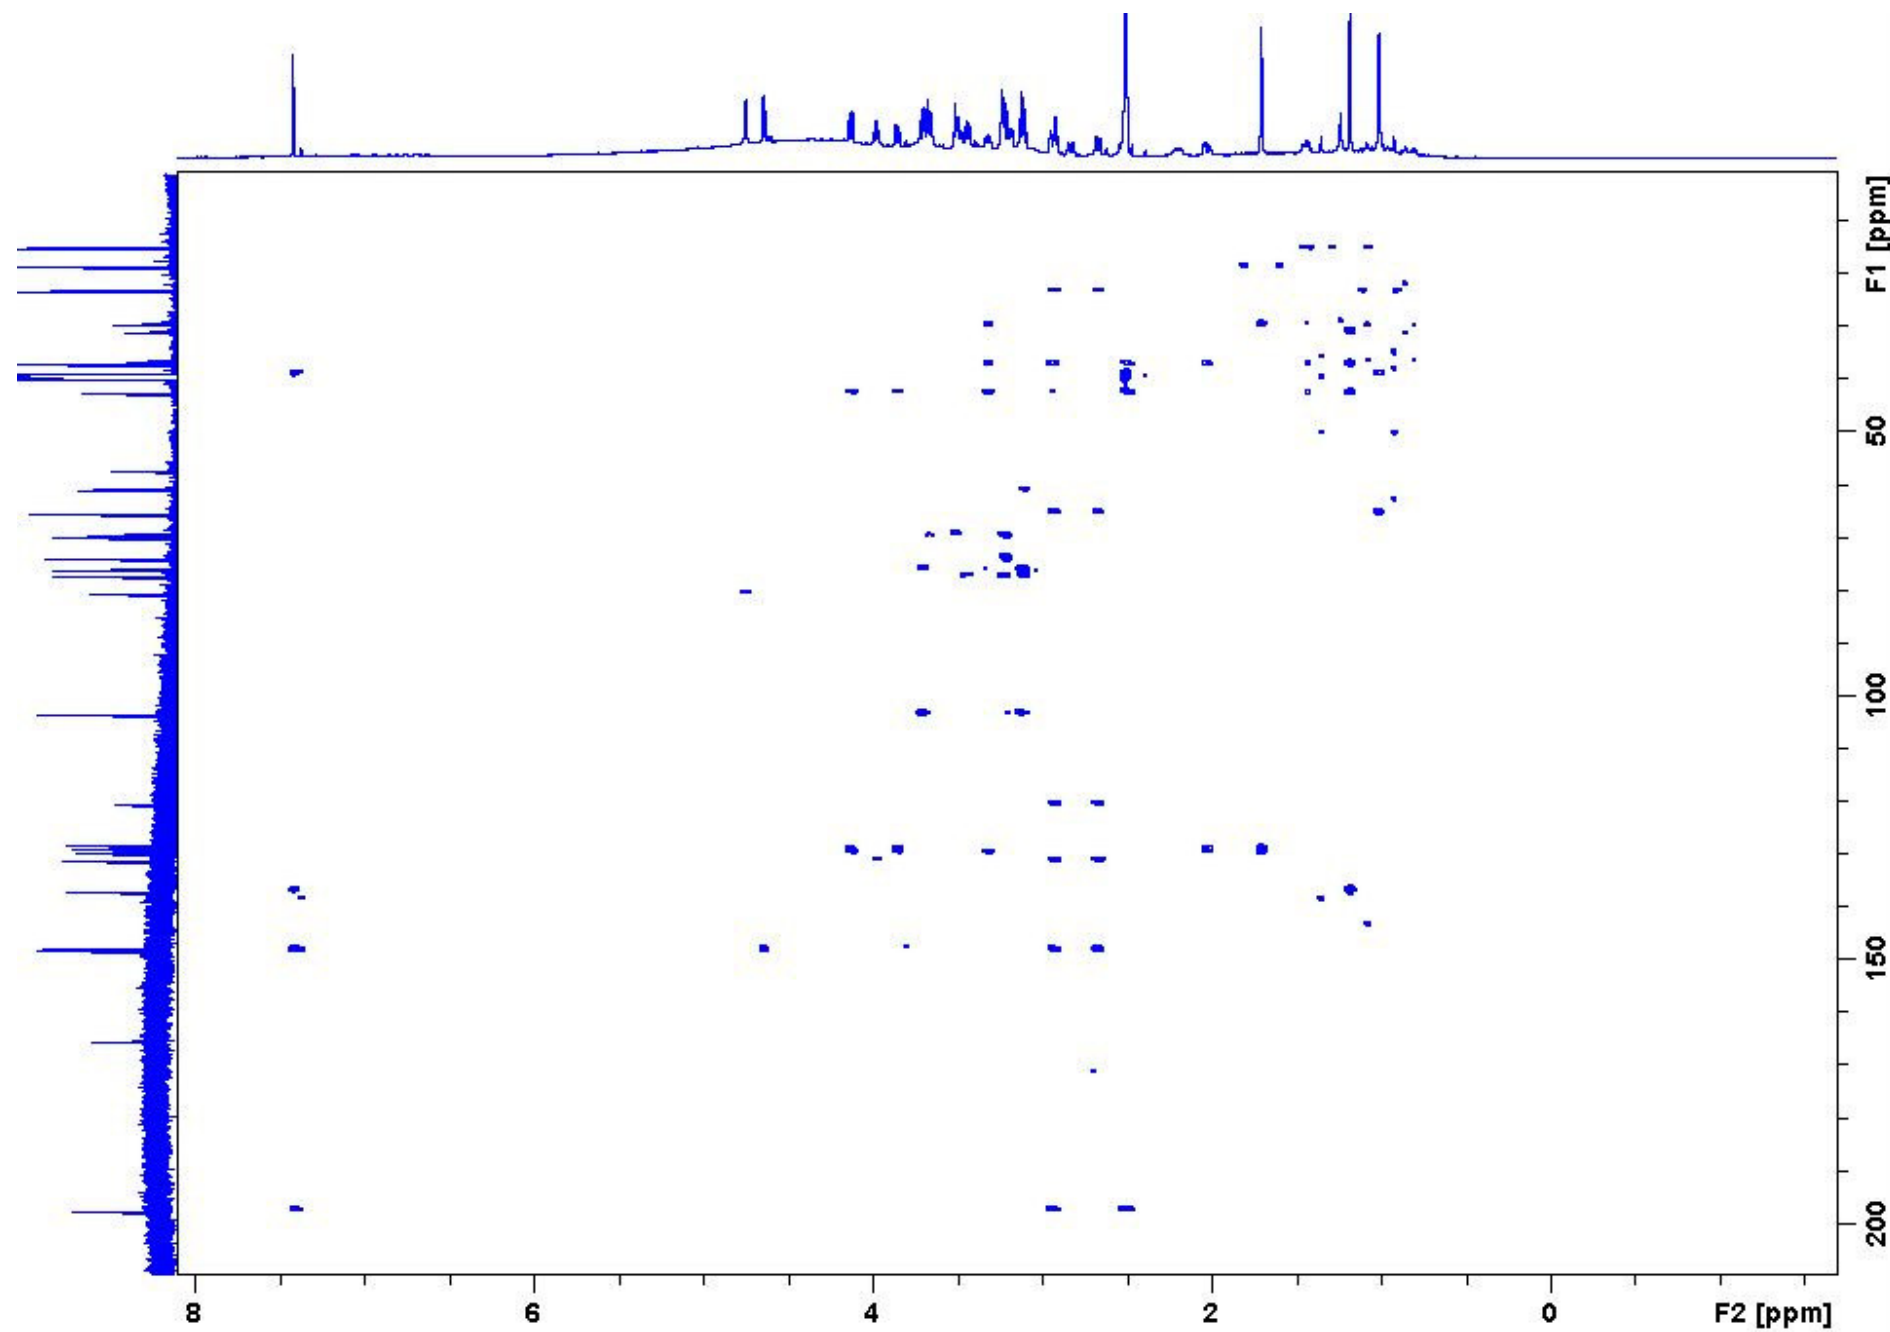

Figure S5-B. HMBC spectrum of compound **1** in  $\text{DMSO}-d_6$ .

D:\data\extern\2021\01\2678\_Uddin\_JU-CVI-008\_neg\_001.RAW

1/12/2021 12:53:28 PM

NL: 1.40E8  
 2678\_Uddin\_JU-CVI-008\_neg\_001 #1-42  
 RT: 0.02-0.74 AV: 42 NL: 1.95E8  
 T: FTMS - p ESI Full ms  
 [133.4000-2000.0000]

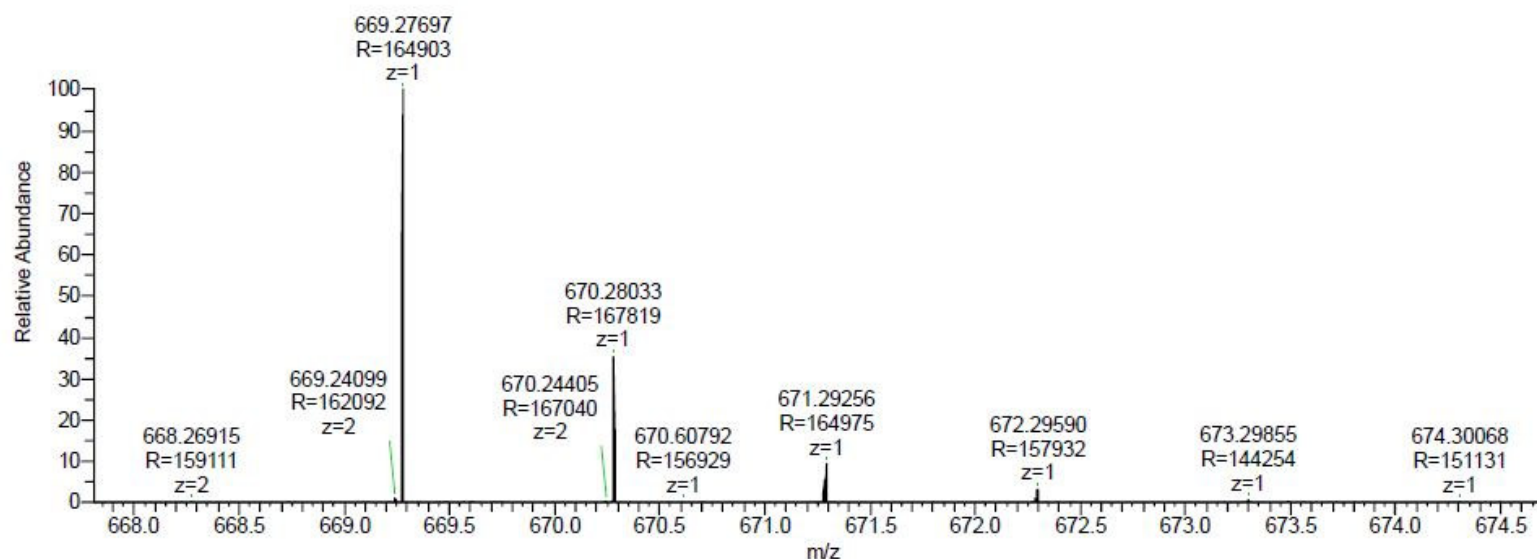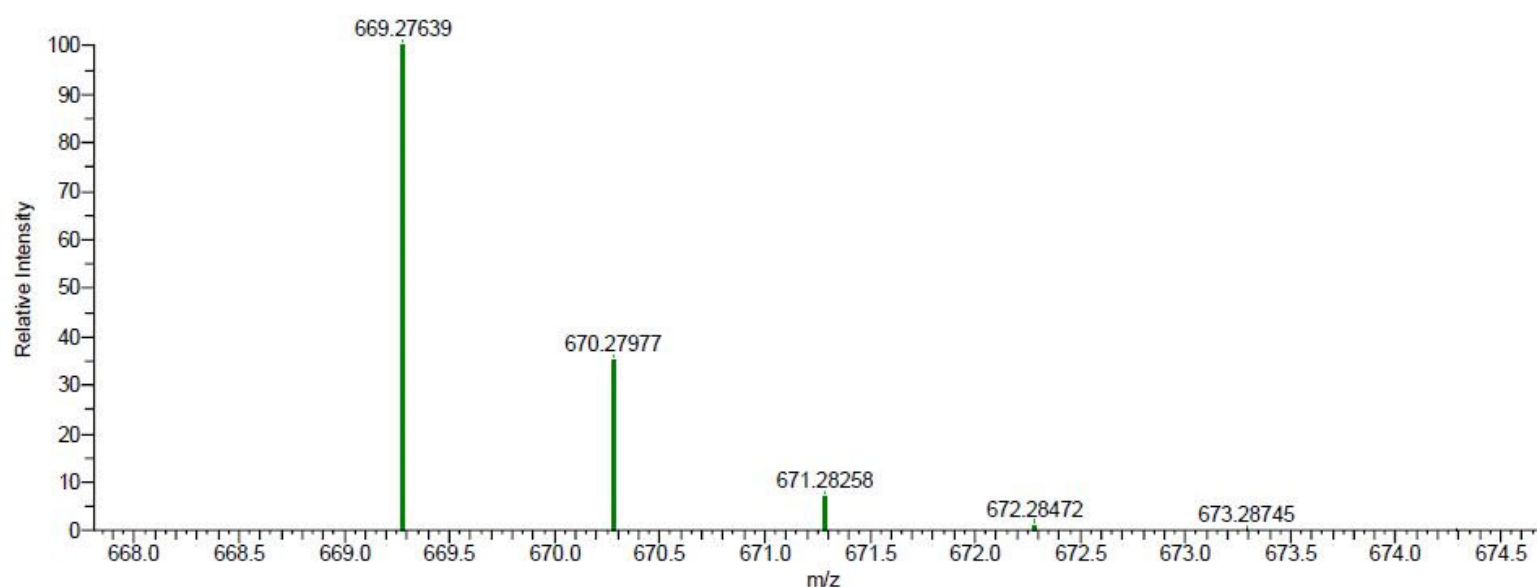

NL: 6.80E5  
 C32H45O15 Chrg -1 R: 164903 Res. Pwr.  
 @FWHM

| Peak Mass | Display Form...                                 | Combined Fit  | RDB   | Delta [ppm] | Theo. mass | Rank | Combined Sc... | # Matched Iso. | # Missed Iso. | MS Cov. [%] | Pattern Cov. [...] | MSMS Match... |
|-----------|-------------------------------------------------|---------------|-------|-------------|------------|------|----------------|----------------|---------------|-------------|--------------------|---------------|
| 669.27697 | C <sub>32</sub> H <sub>45</sub> O <sub>15</sub> | 94.3841840... | 10.50 | 0.85        | 669.27639  | 1    | 0              | 5              | 1             | 0           | 0                  | (Collection)  |

Figure S6. HR mass spectrum of compound 1 in methanol.

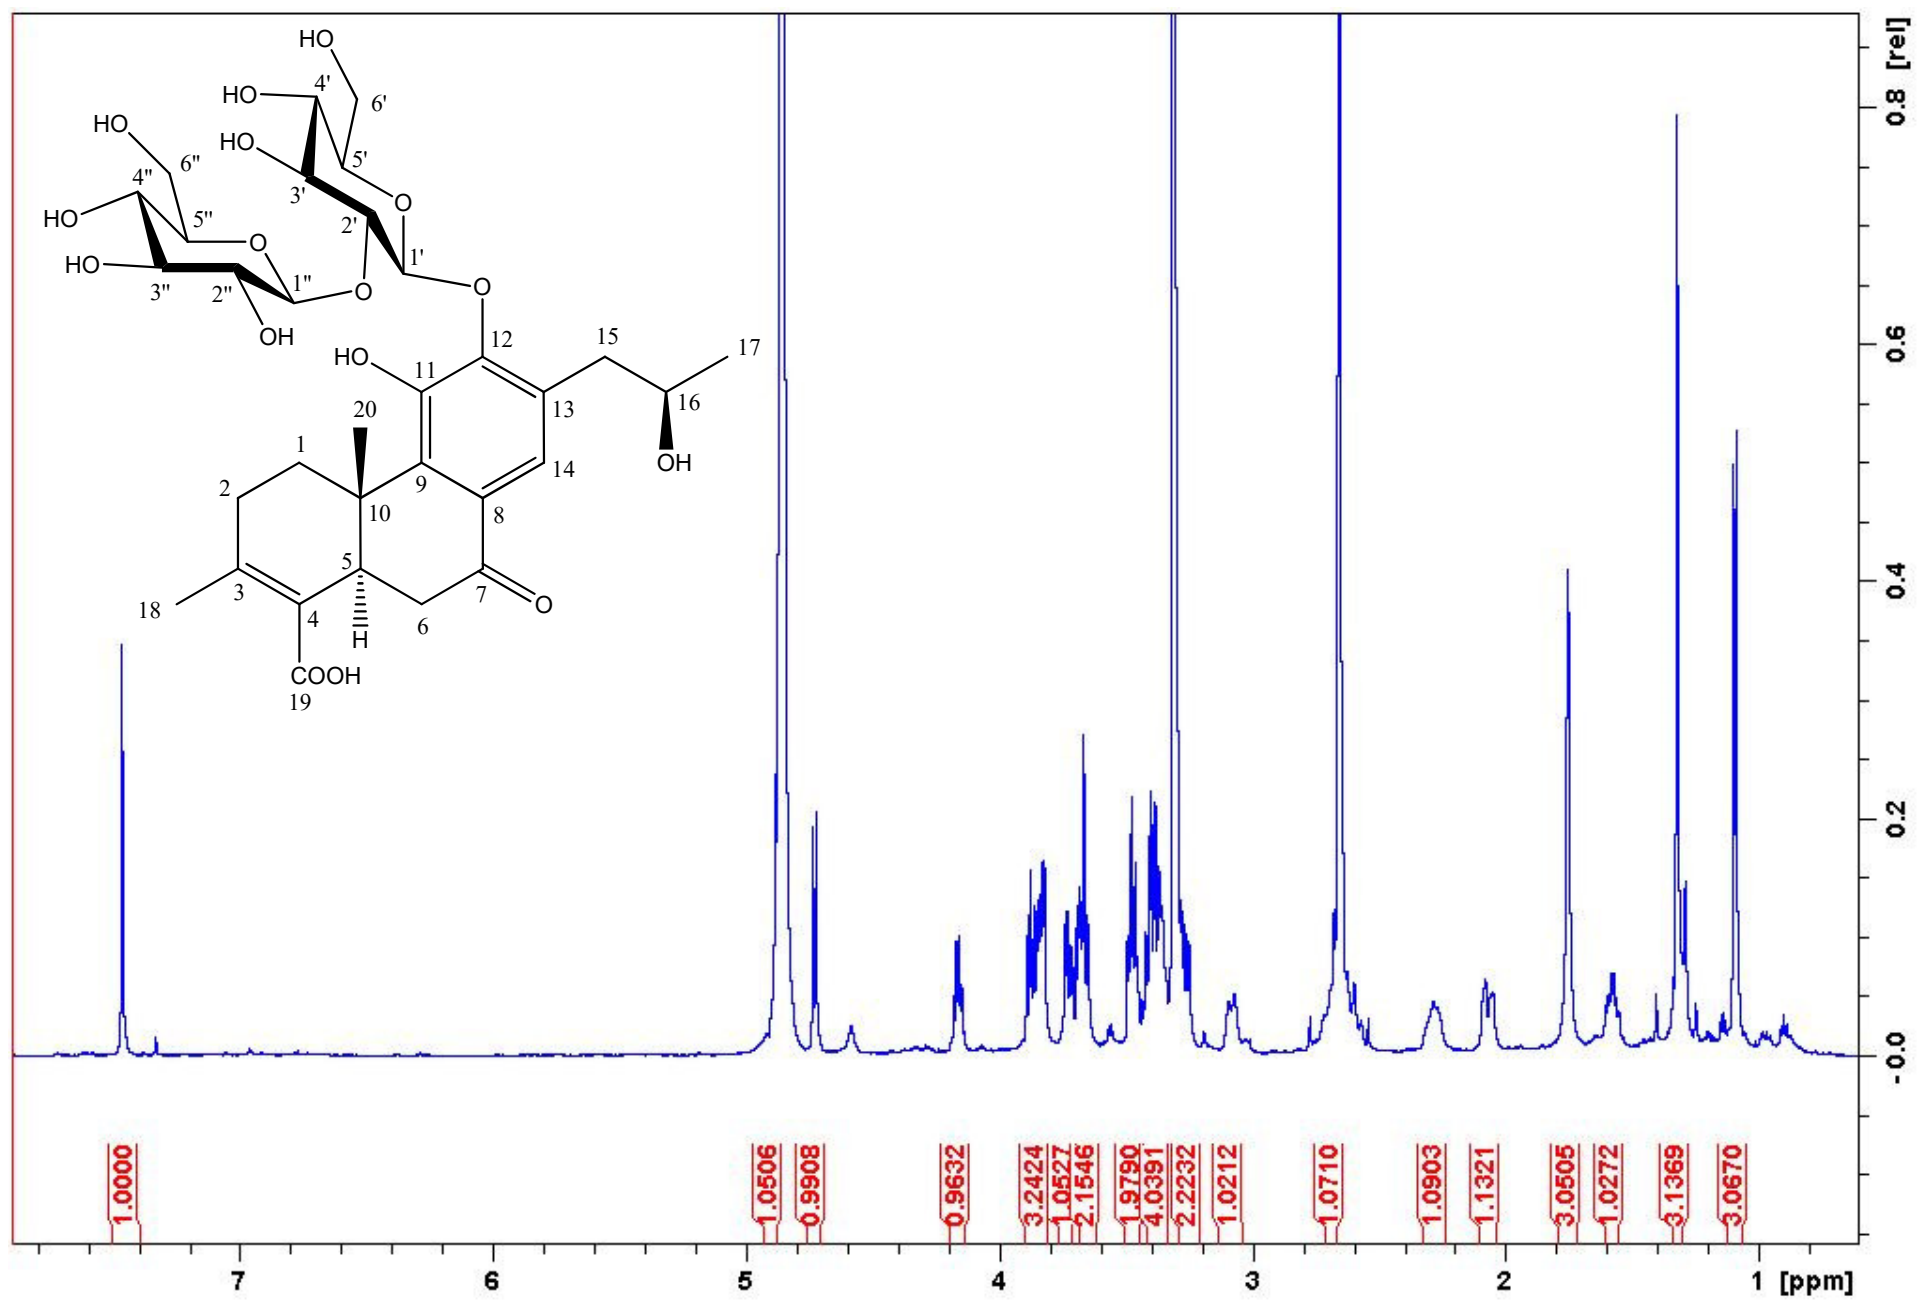

Figure S7-A.  $^1\text{H}$  NMR spectrum of compound **2** in  $\text{Methanol-}d_4$ .

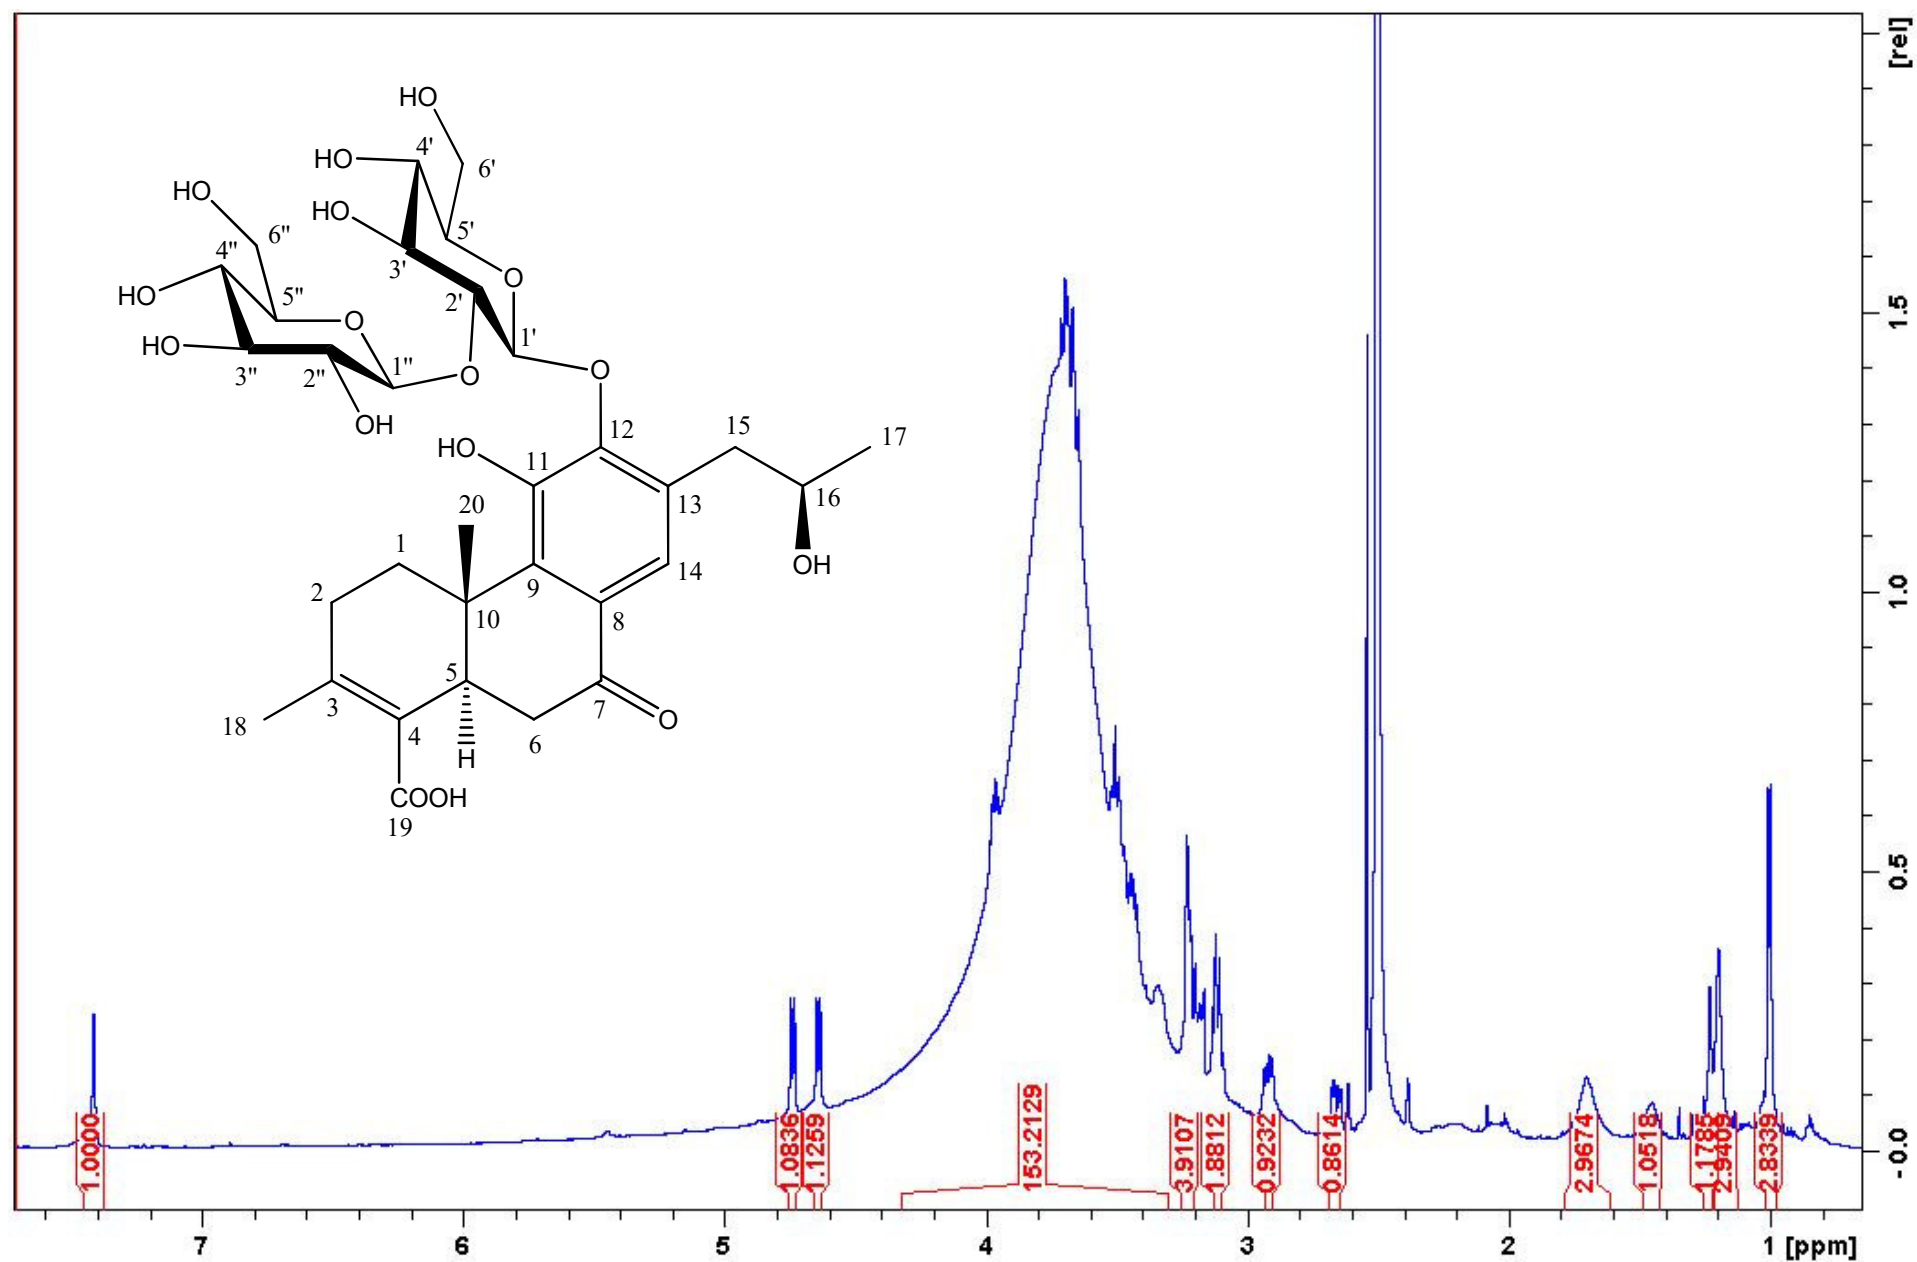

Figure S7-B.  $^1\text{H}$  NMR spectrum of compound **2** in  $\text{DMSO-}d_6$ .

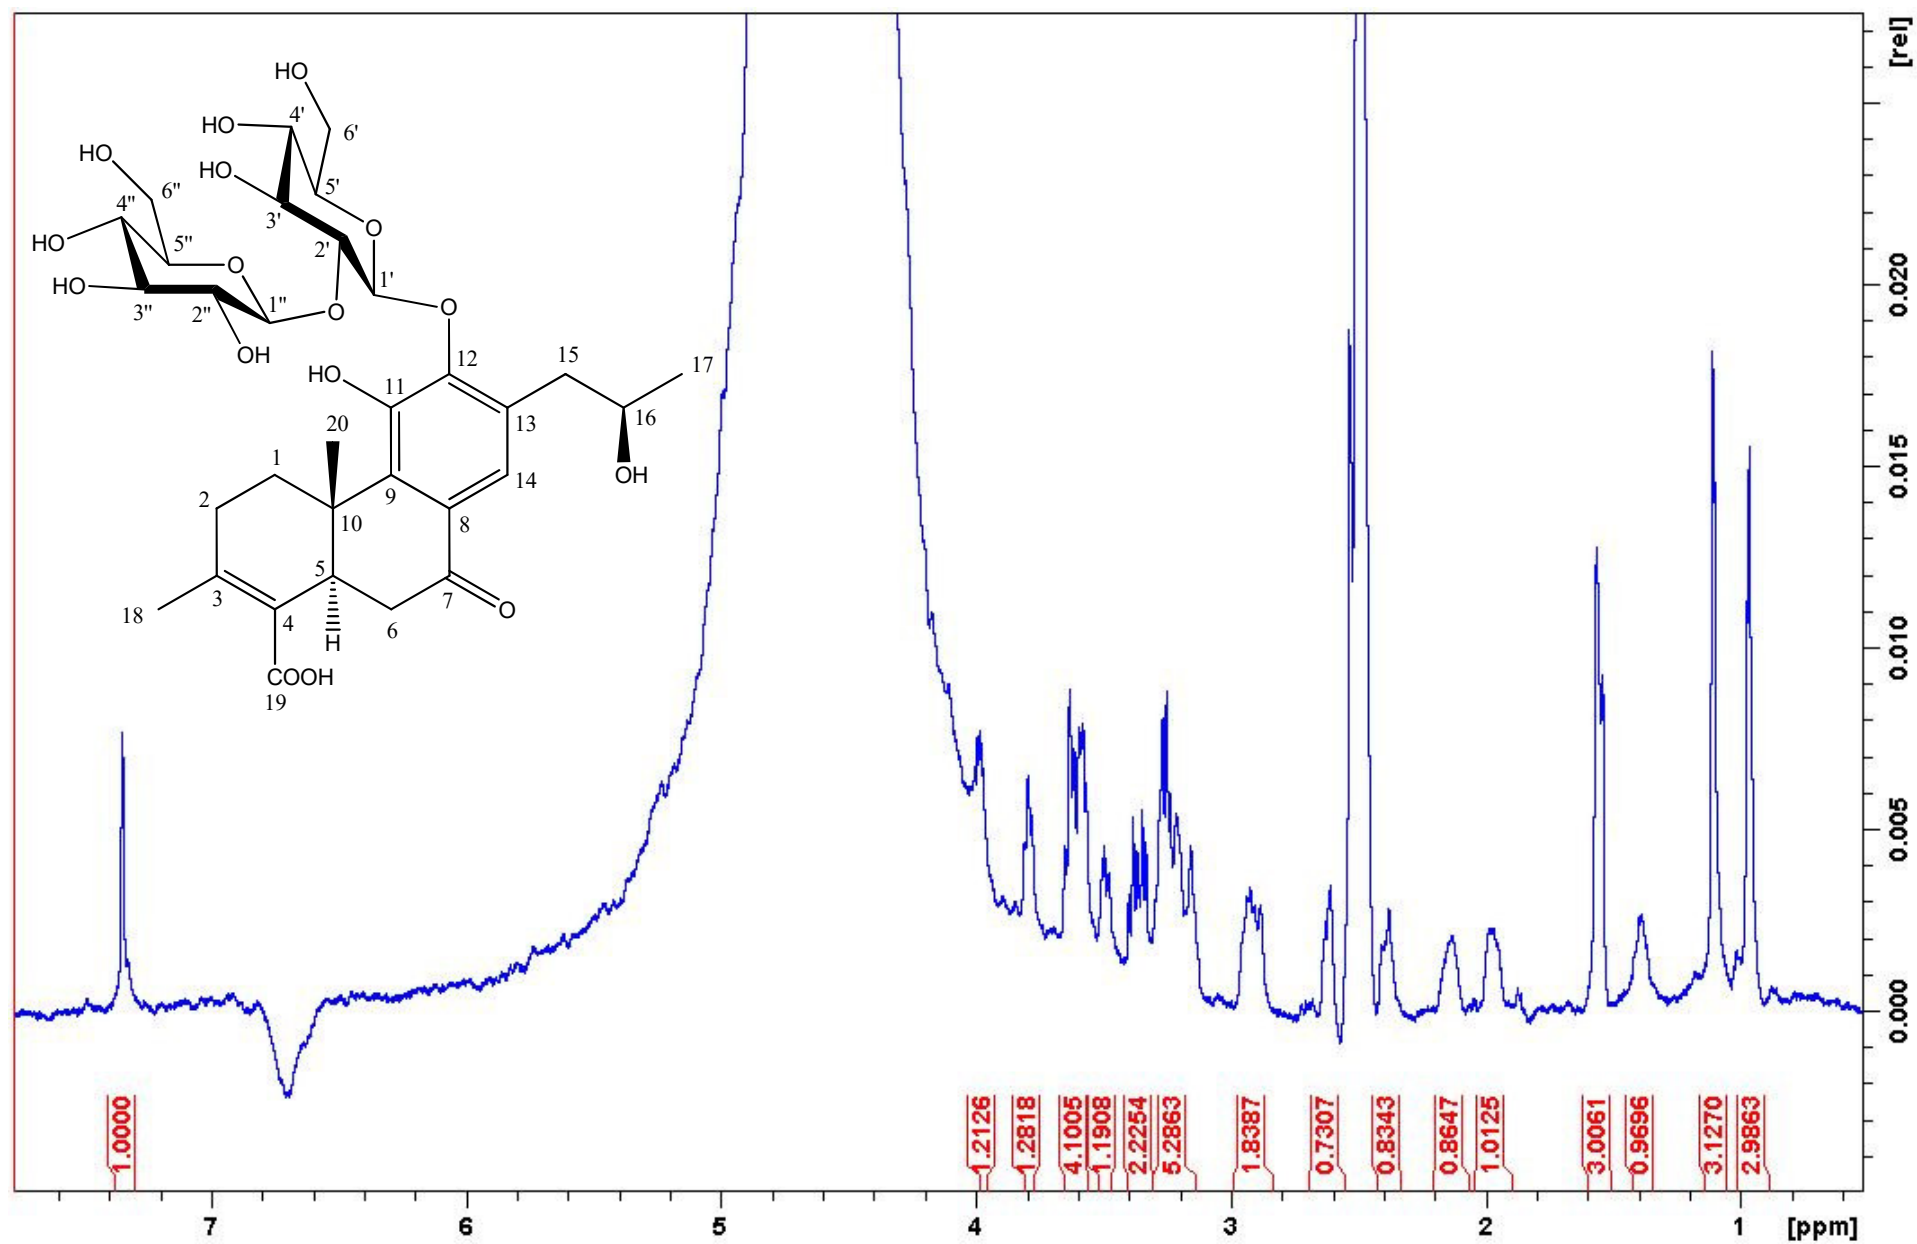

Figure S7-C.  $^1\text{H}$  NMR spectrum of compound 2 in  $\text{D}_2\text{O}$ .



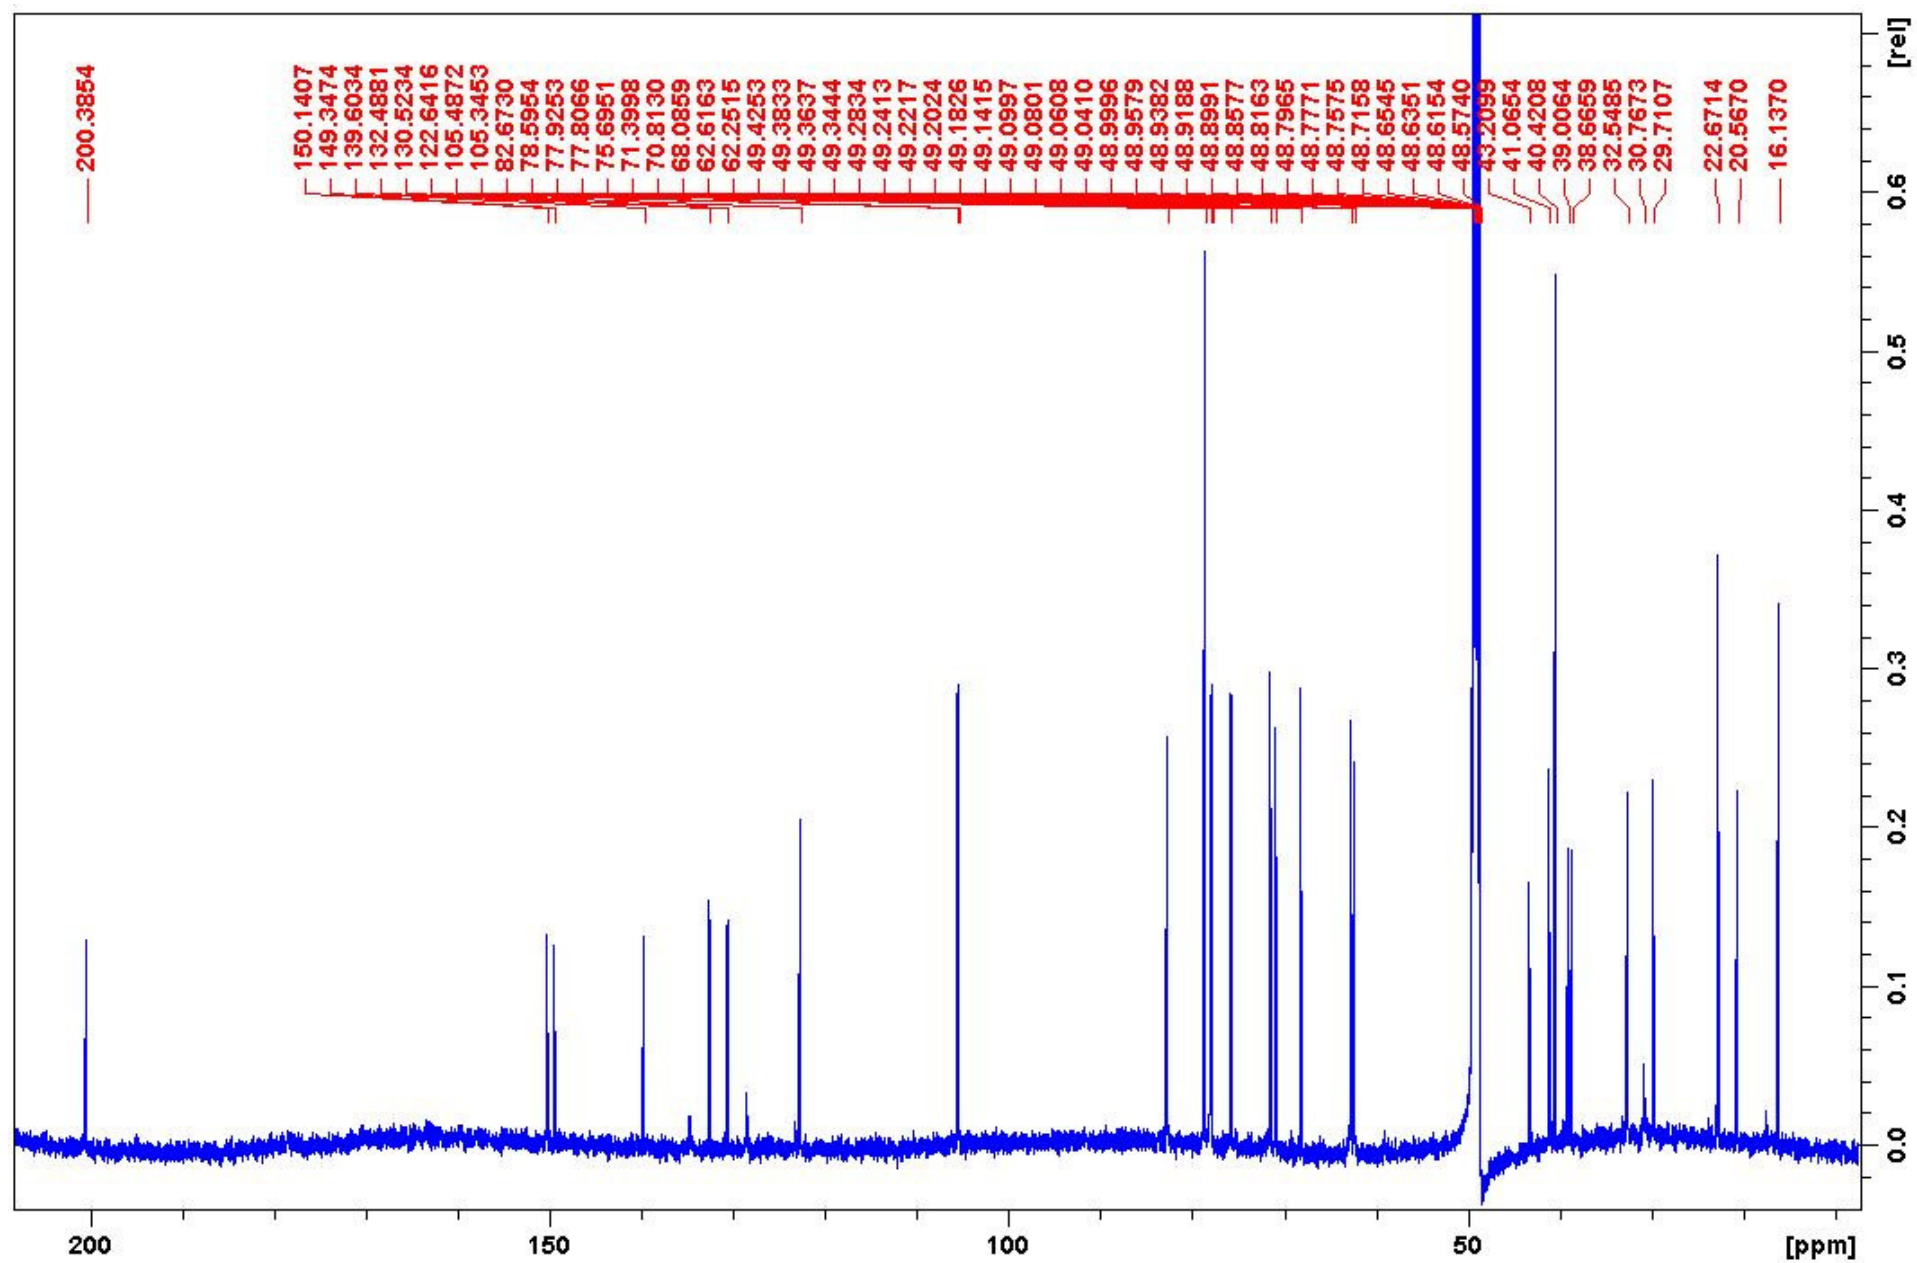

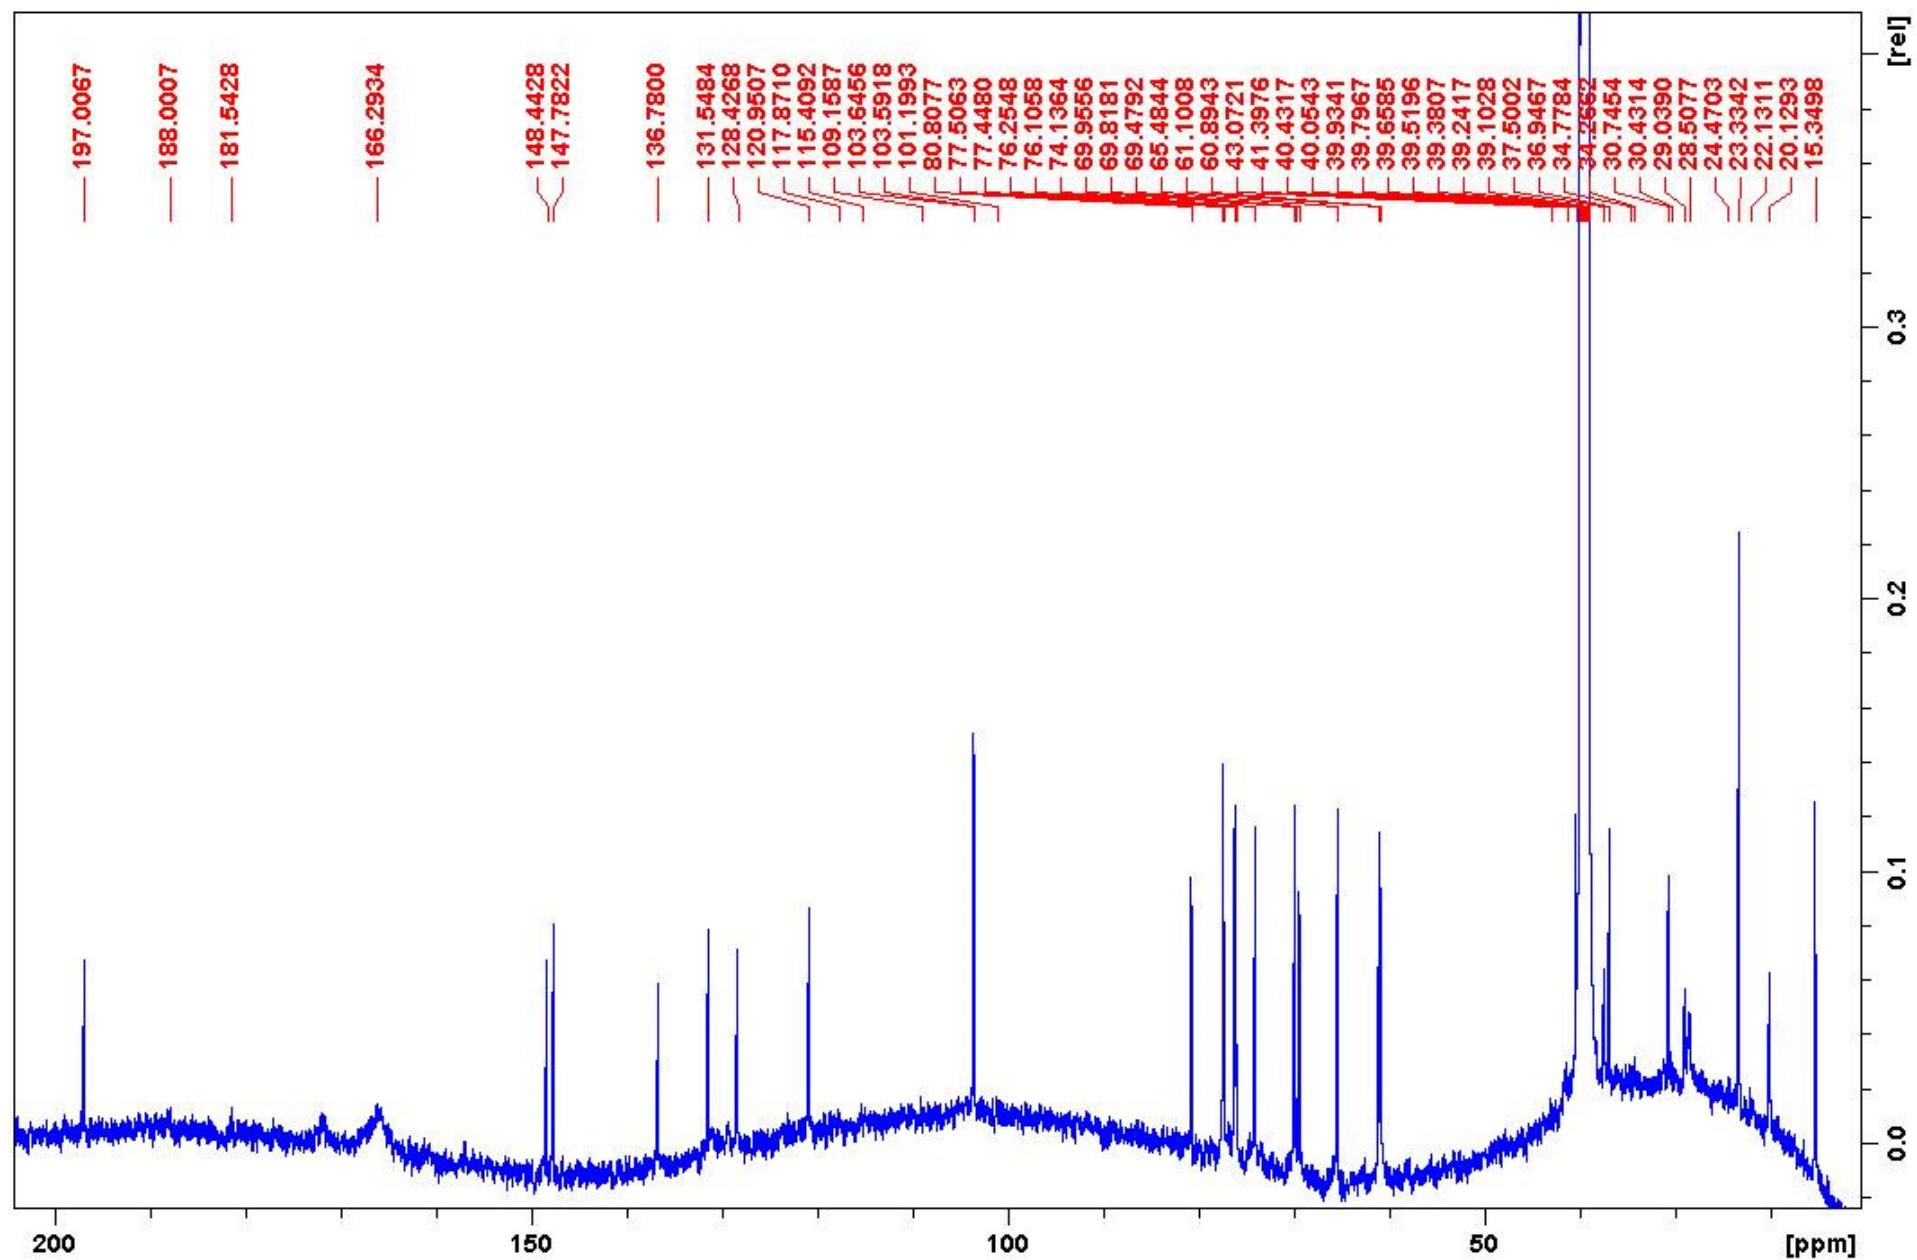

Figure S8-B. <sup>13</sup>C NMR spectrum of compound 2 in DMSO-*d*<sub>6</sub>.

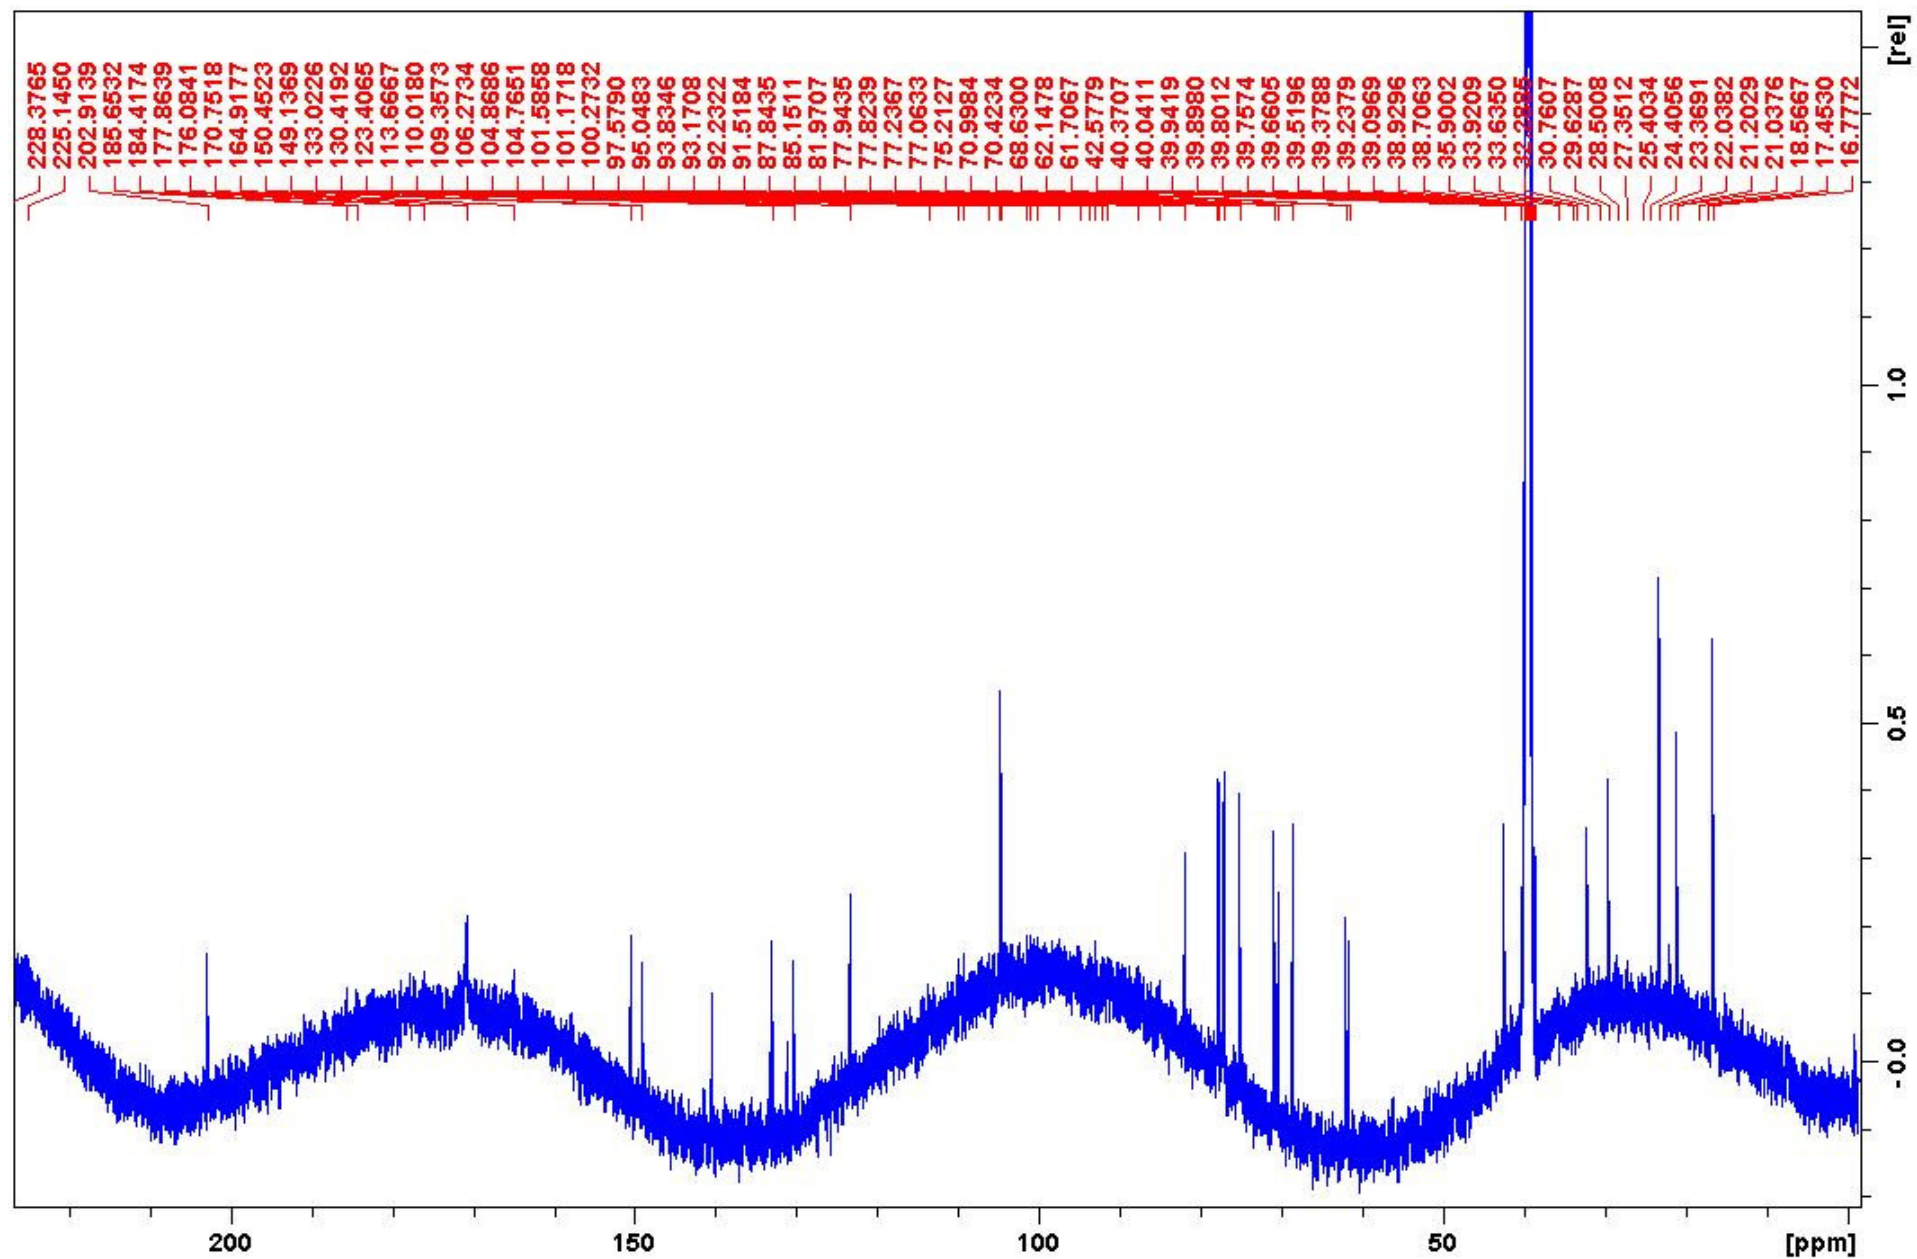Figure S8-C. <sup>13</sup>C NMR spectrum of compound **2** in D<sub>2</sub>O.

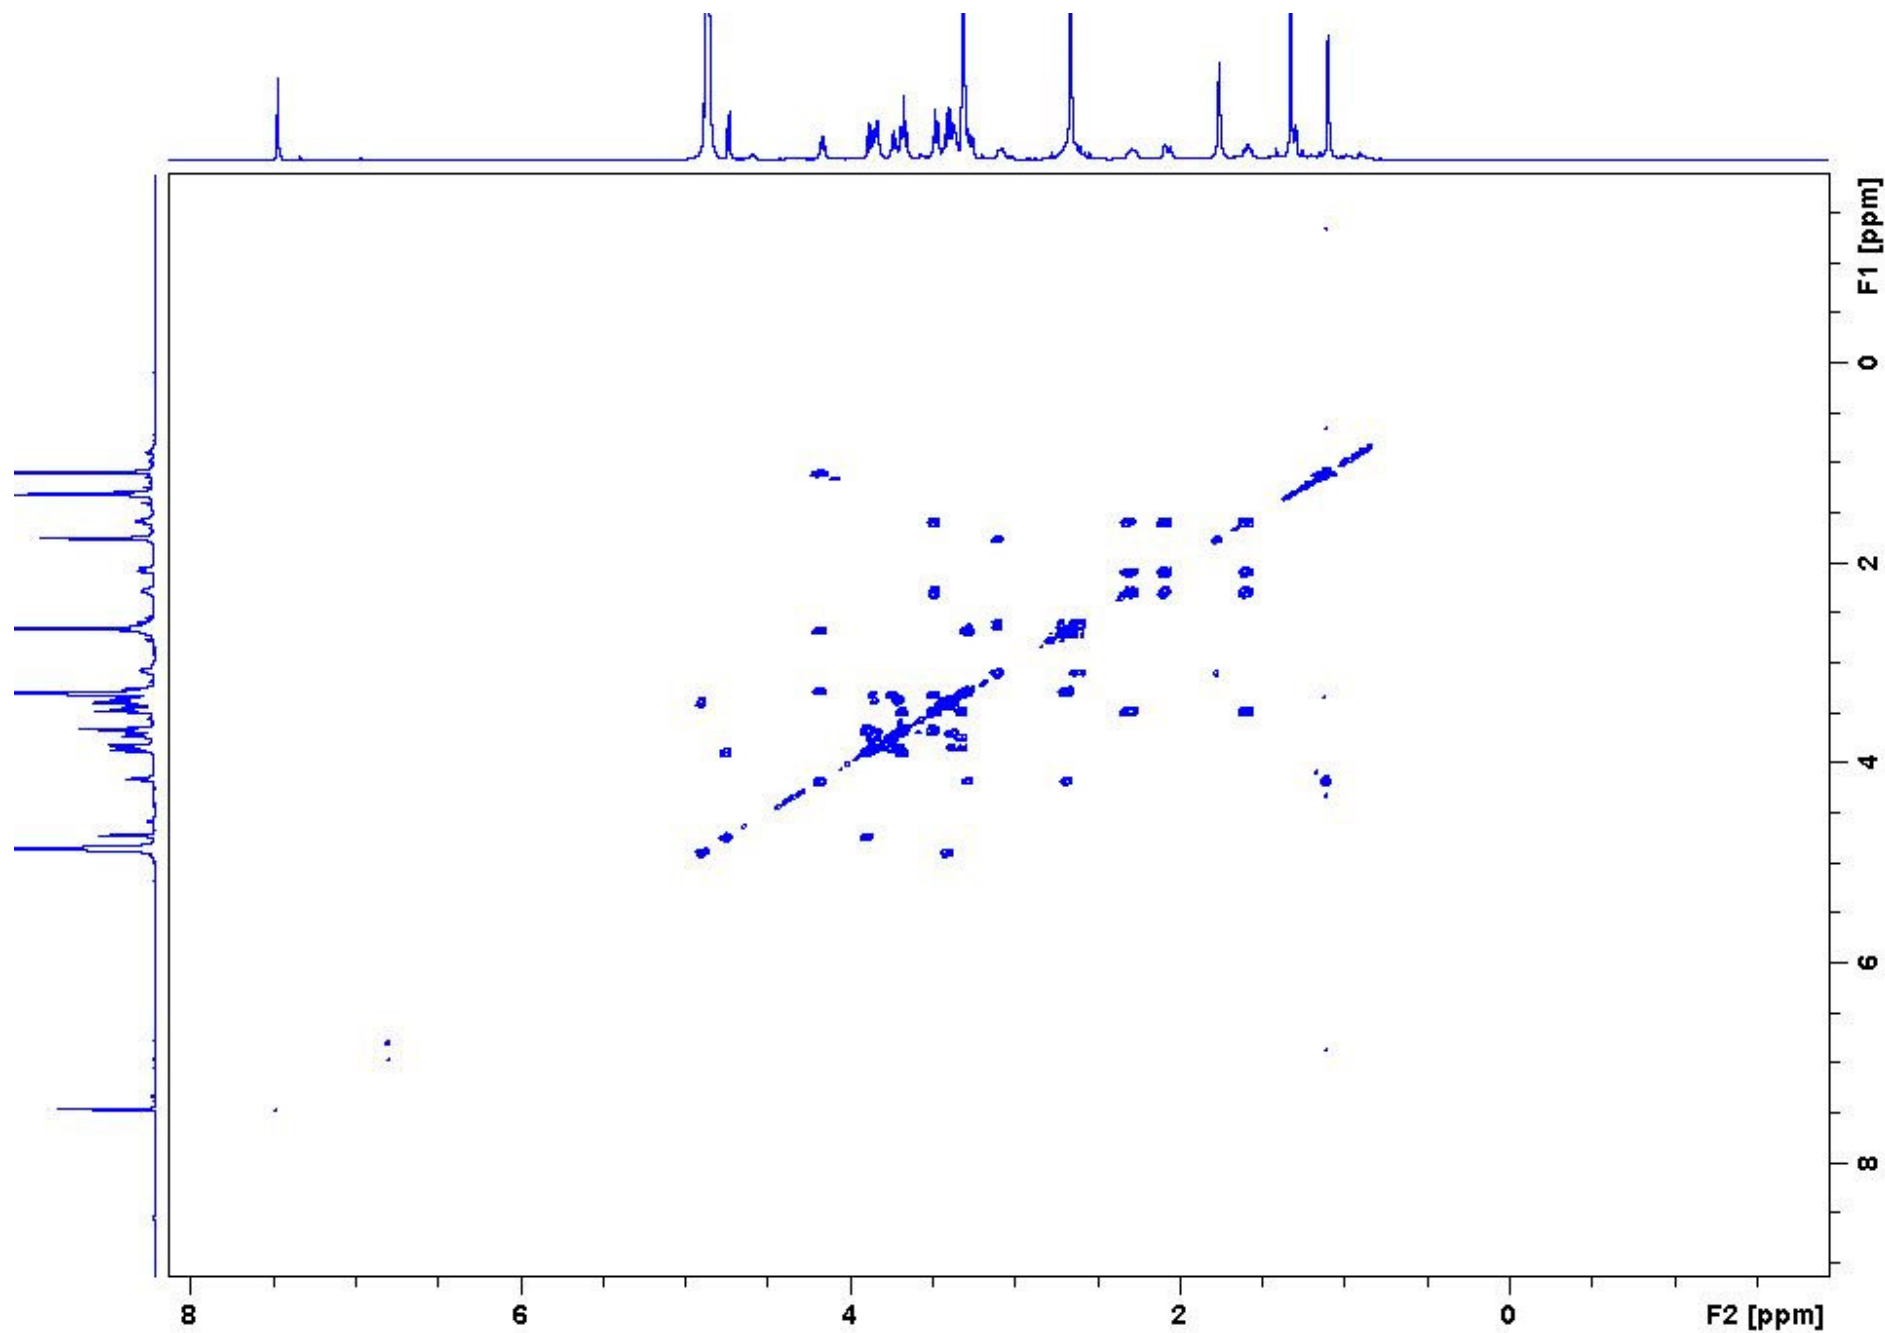

Figure S9-A. COSY spectrum of compound **2** in Methanol- $d_4$ .

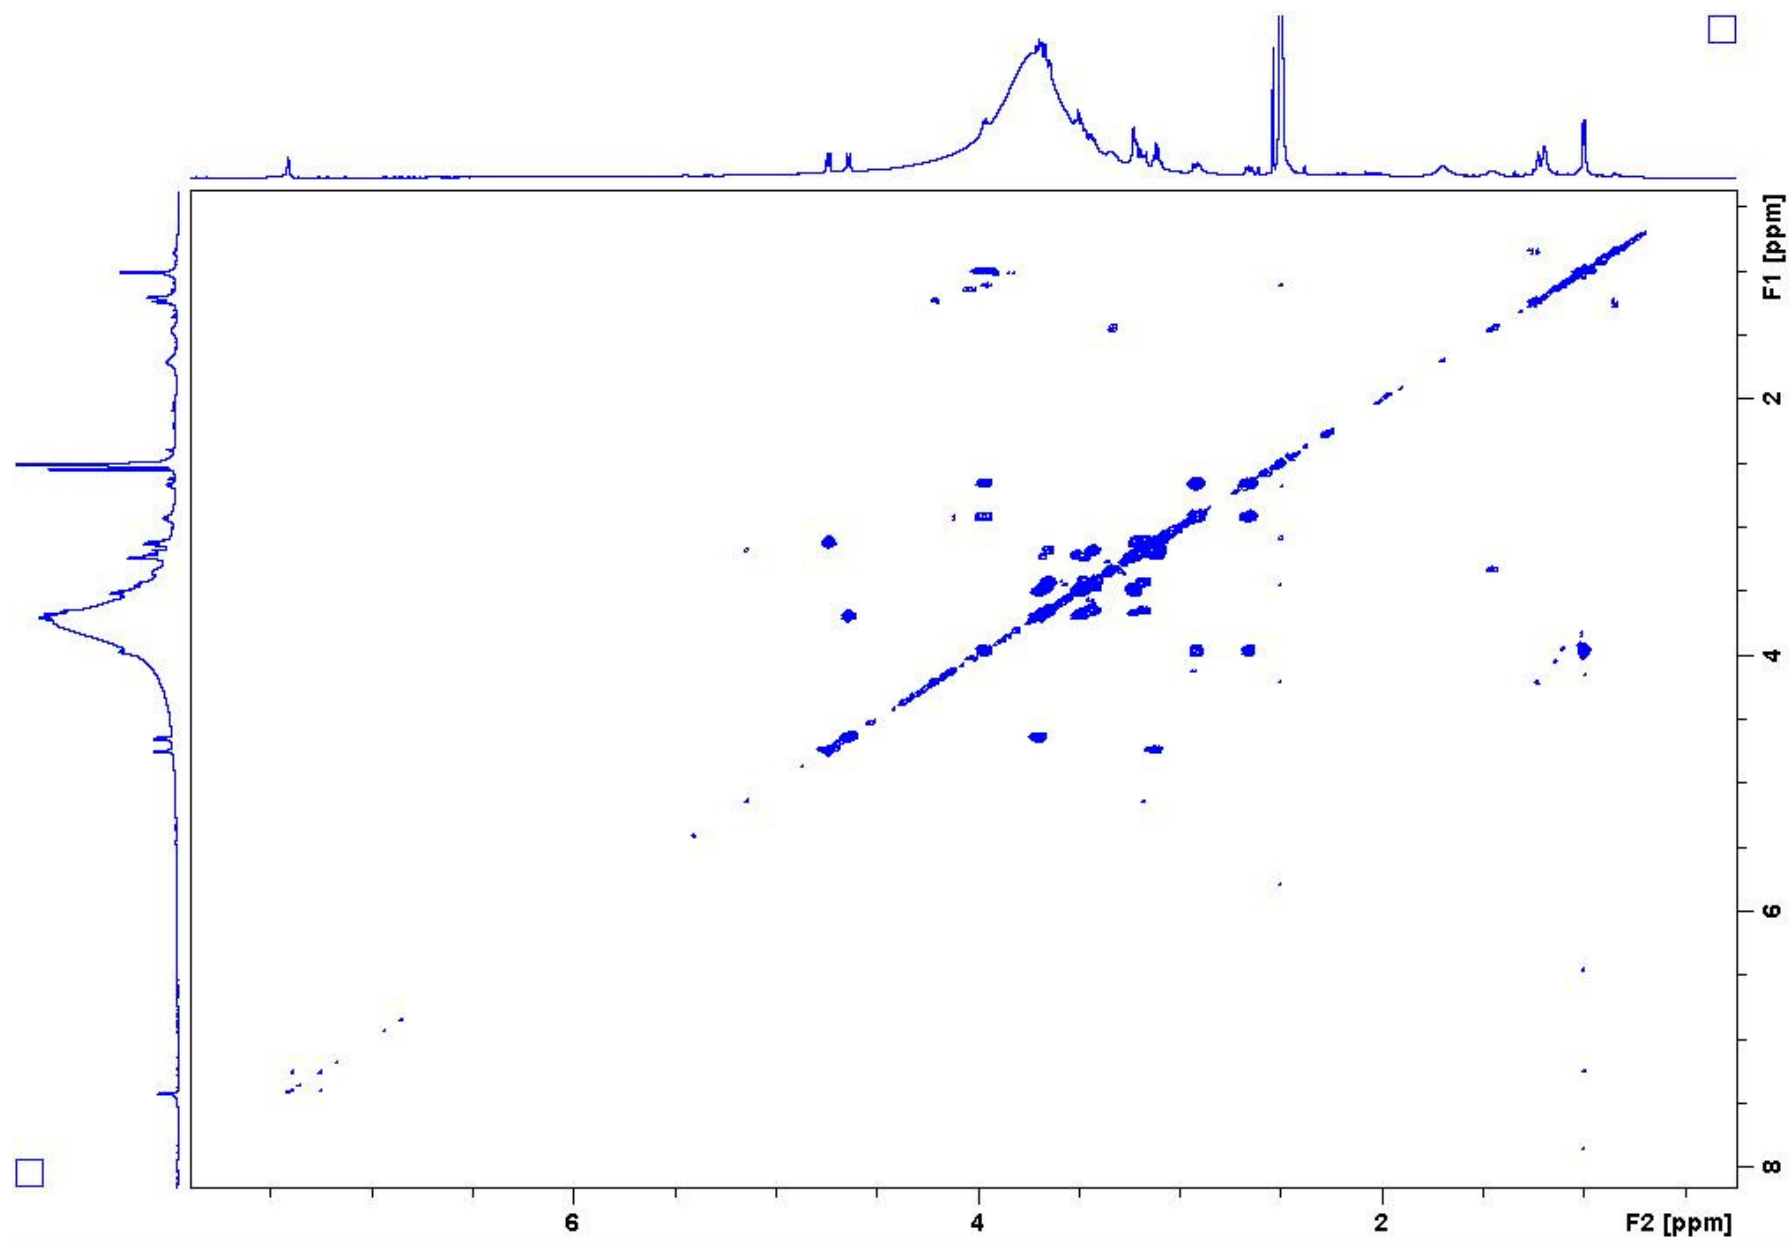

Figure S9-B. COSY spectrum of compound 2 in DMSO- $d_6$ .

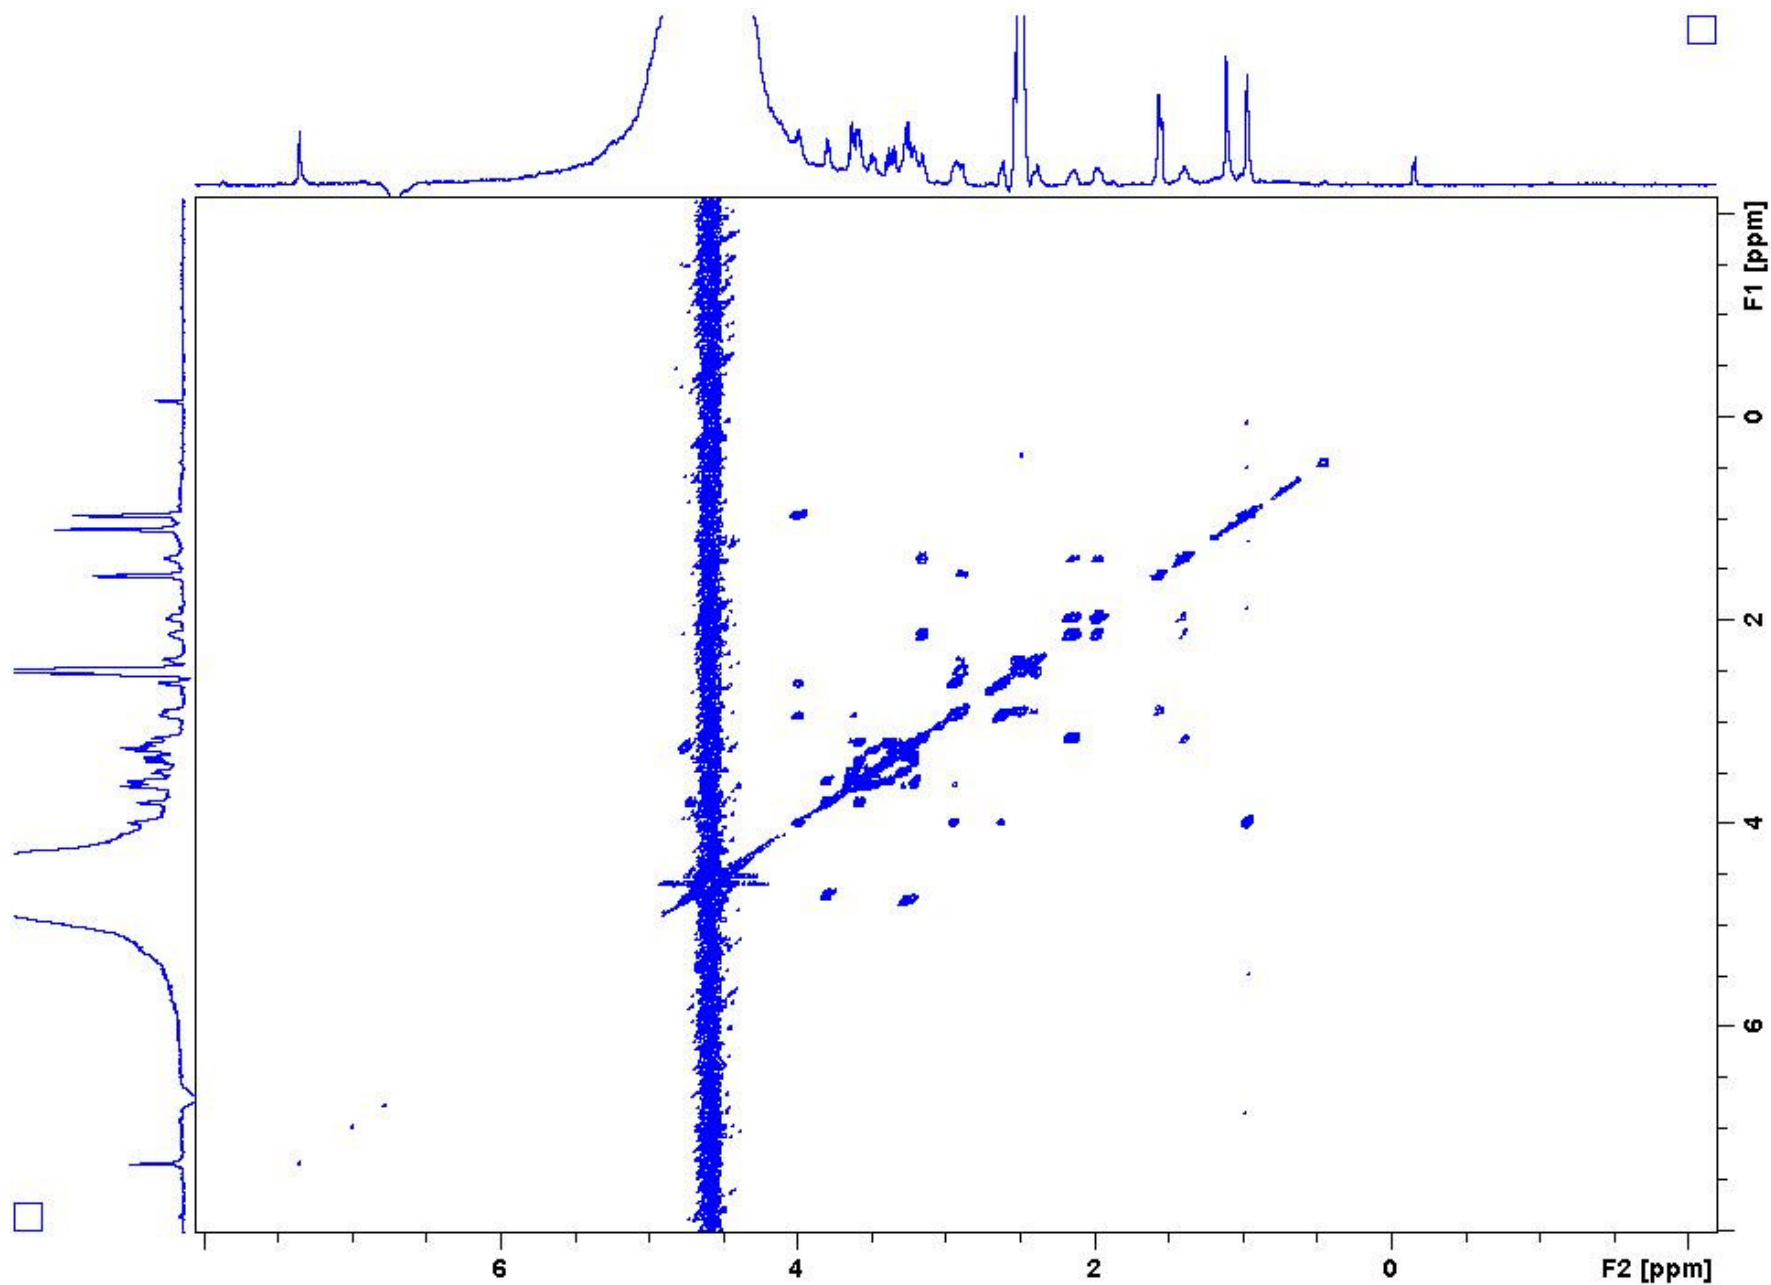

Figure S9-C. COSY spectrum of compound **2** in D<sub>2</sub>O.

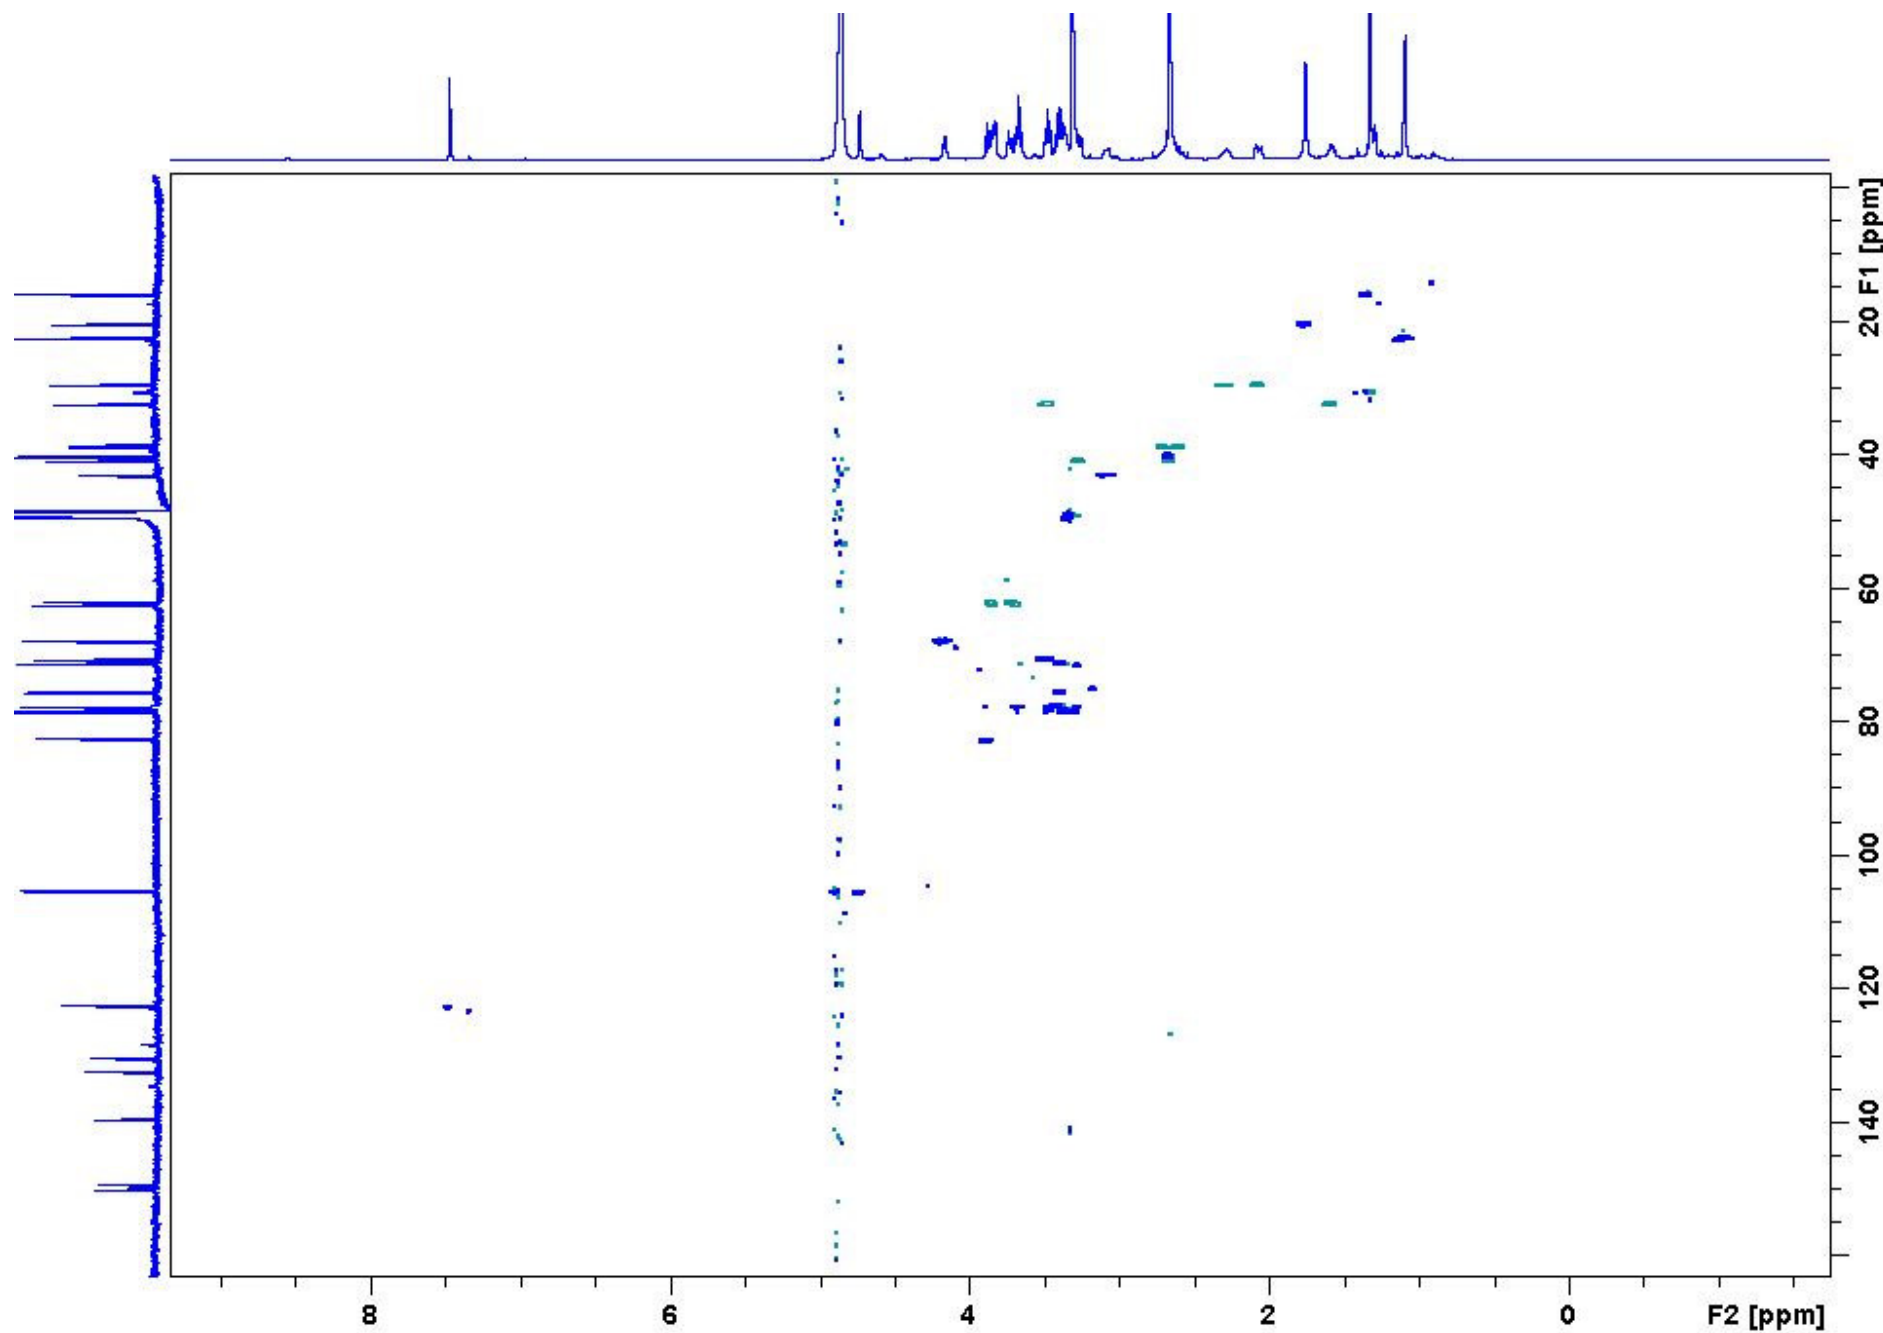

Figure S10-A. HSQC spectrum of compound 2 in Methanol- $d_4$ .



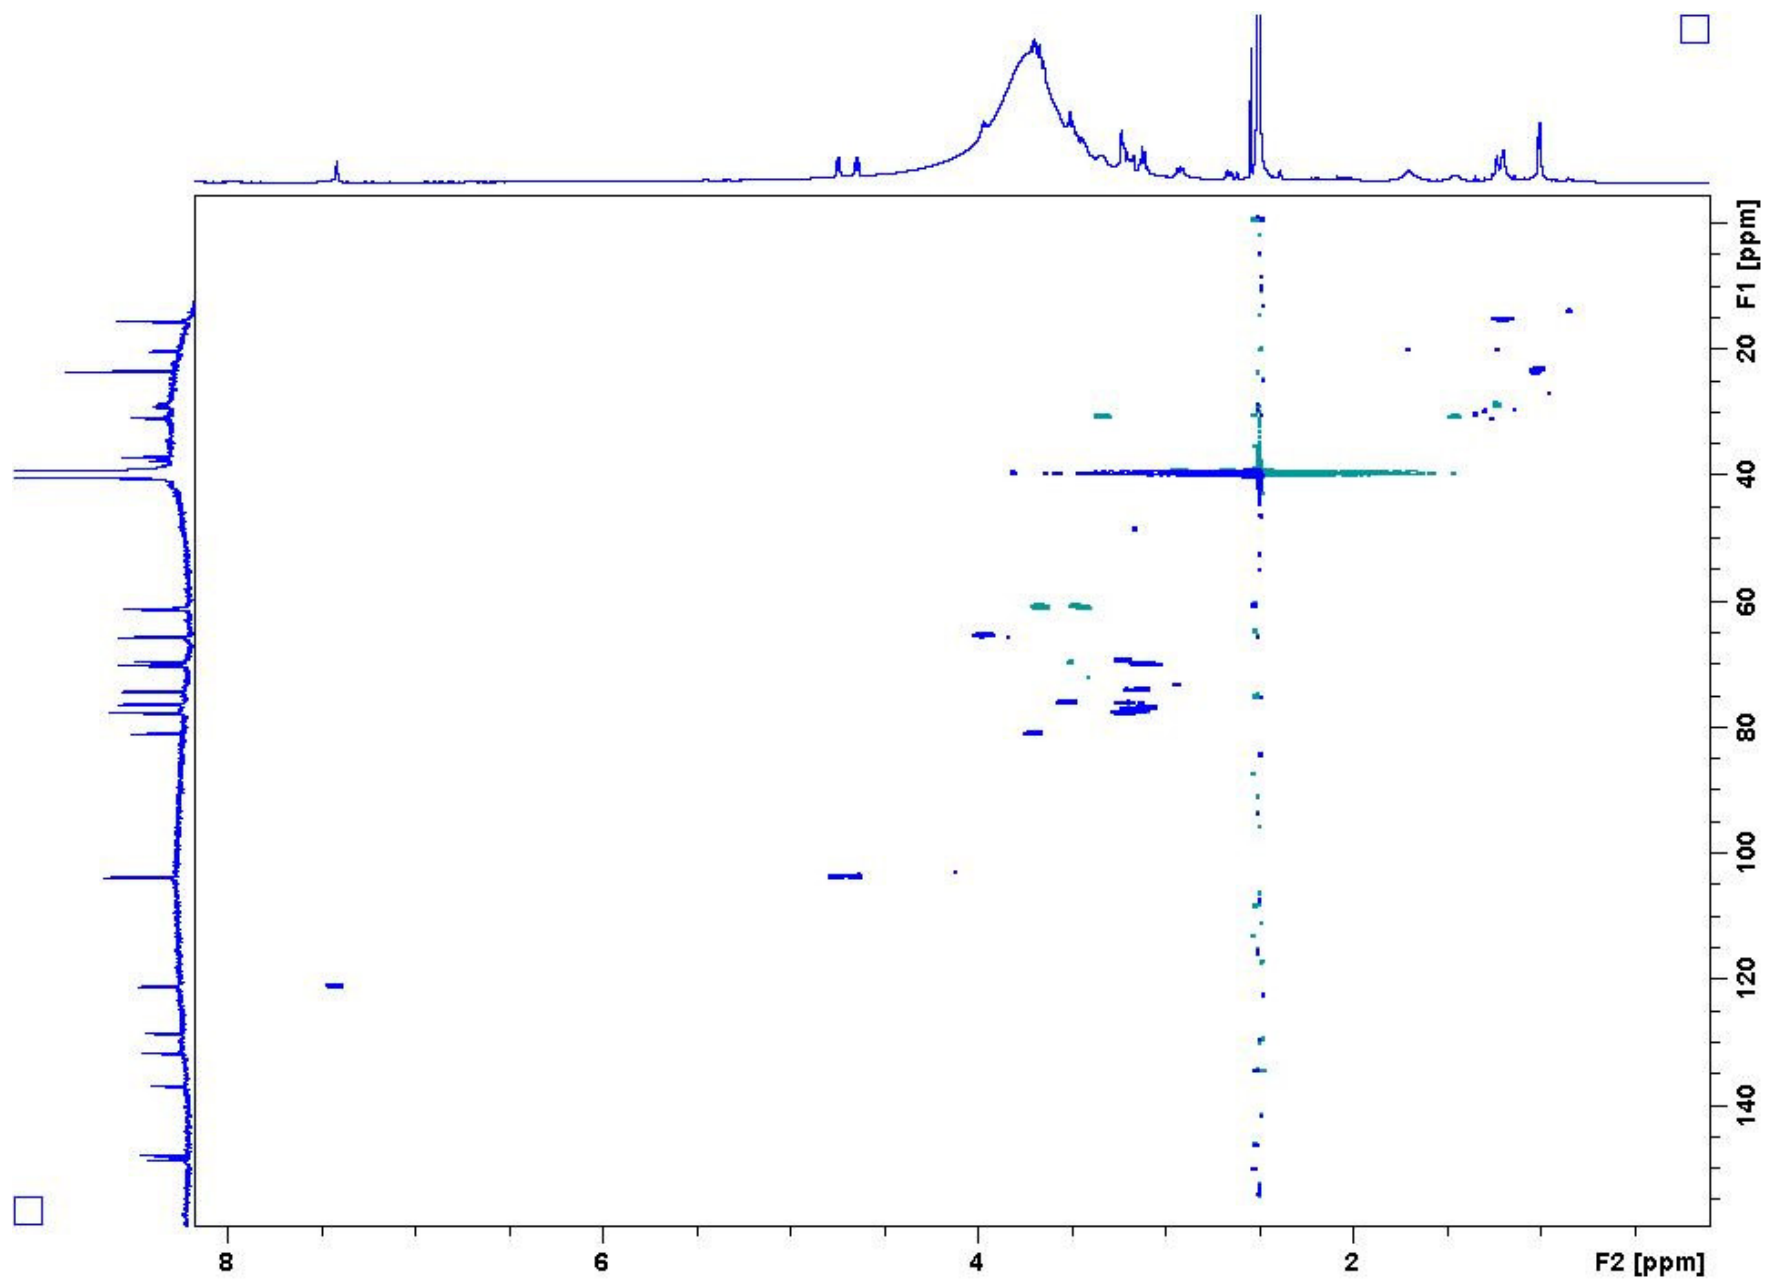

Figure S10-B. HSQC spectrum of compound **2** in DMSO- $d_6$ .



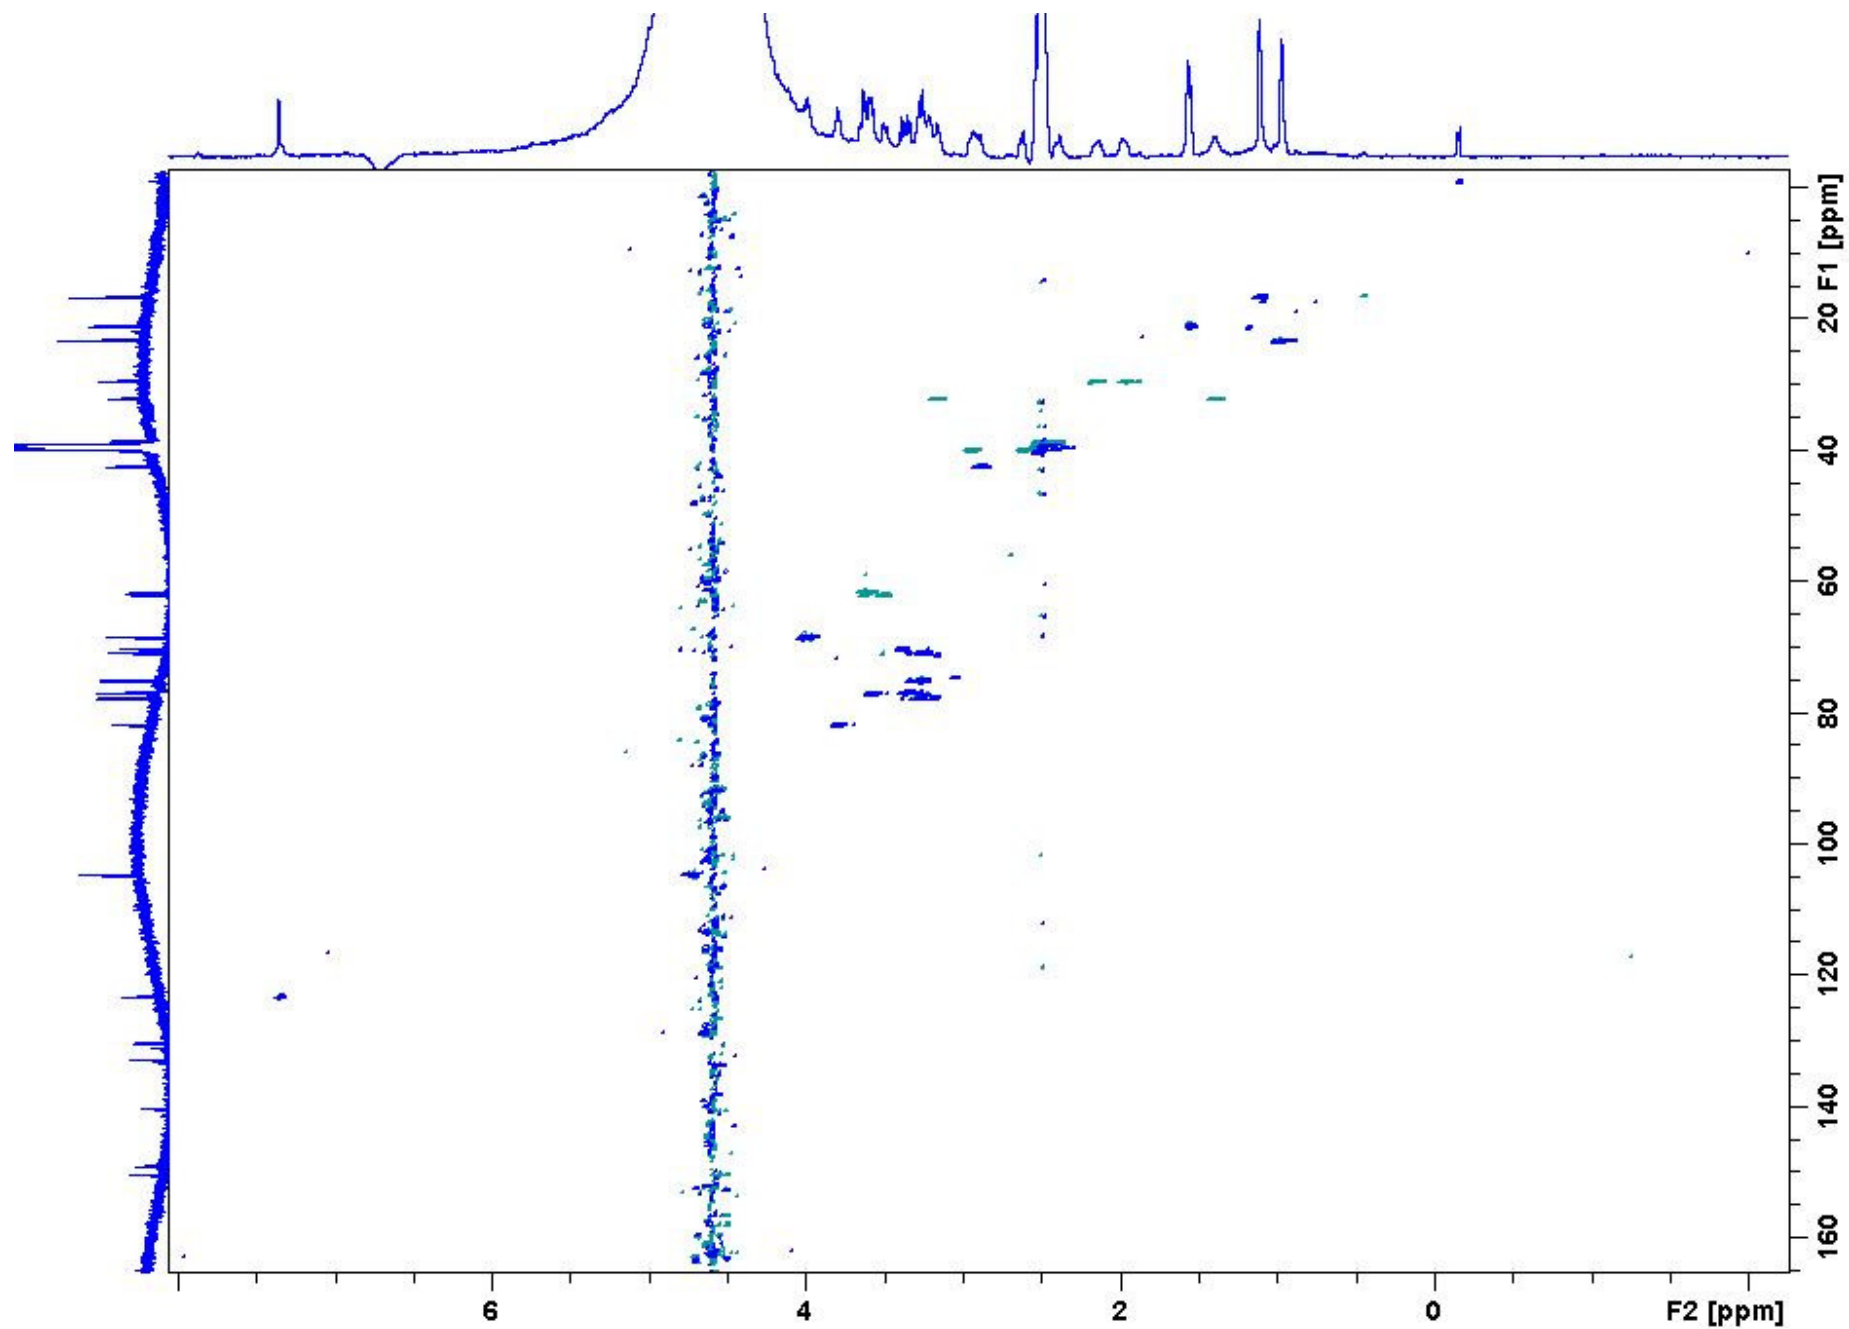

Figure S10-C. HSQC spectrum of compound **2** in  $\text{D}_2\text{O}$ .

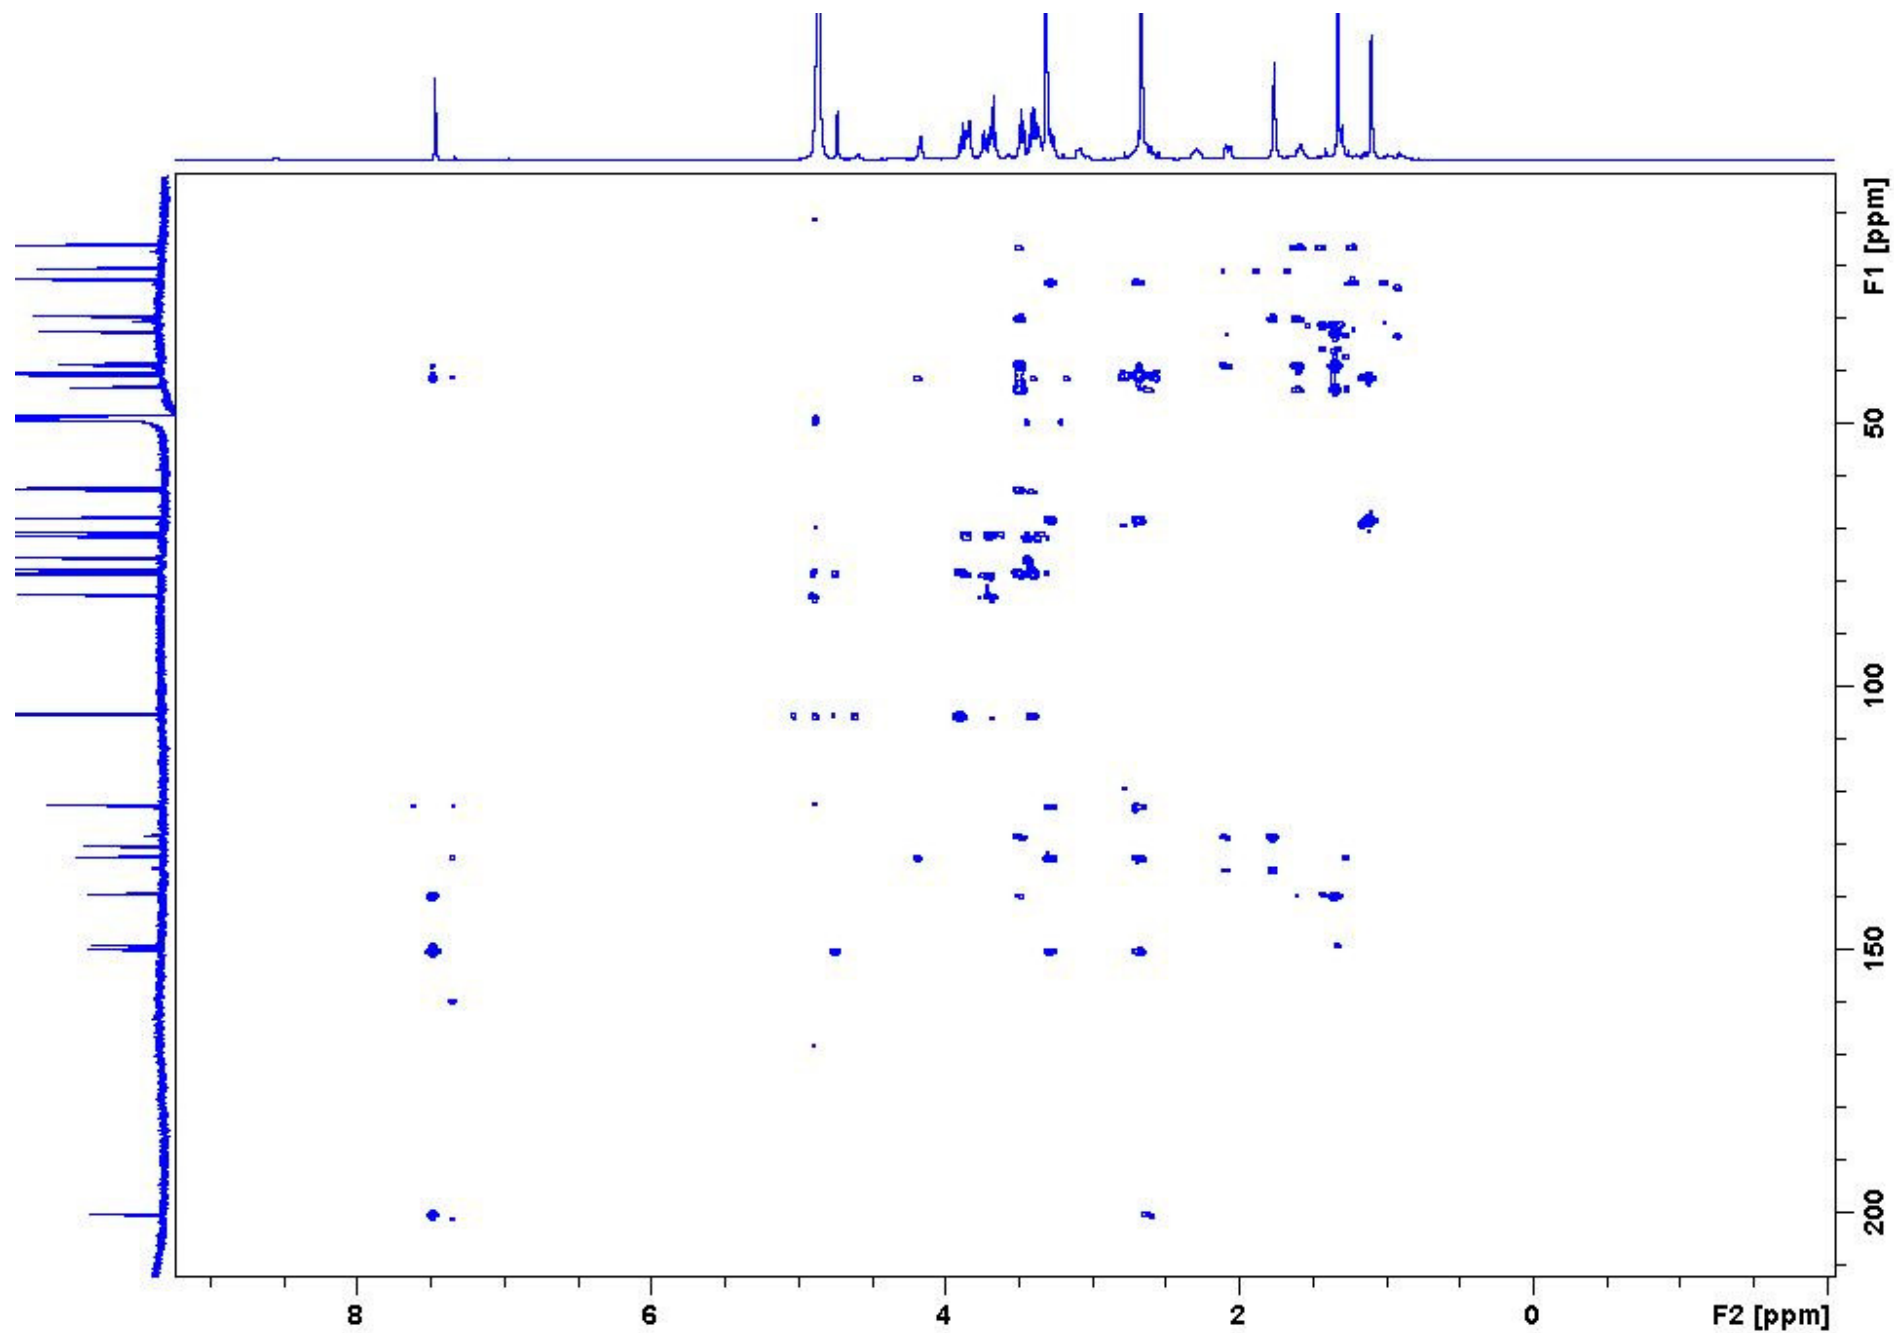

Figure S11-A. HMBC spectrum of compound **2** in Methanol- $d_4$ .

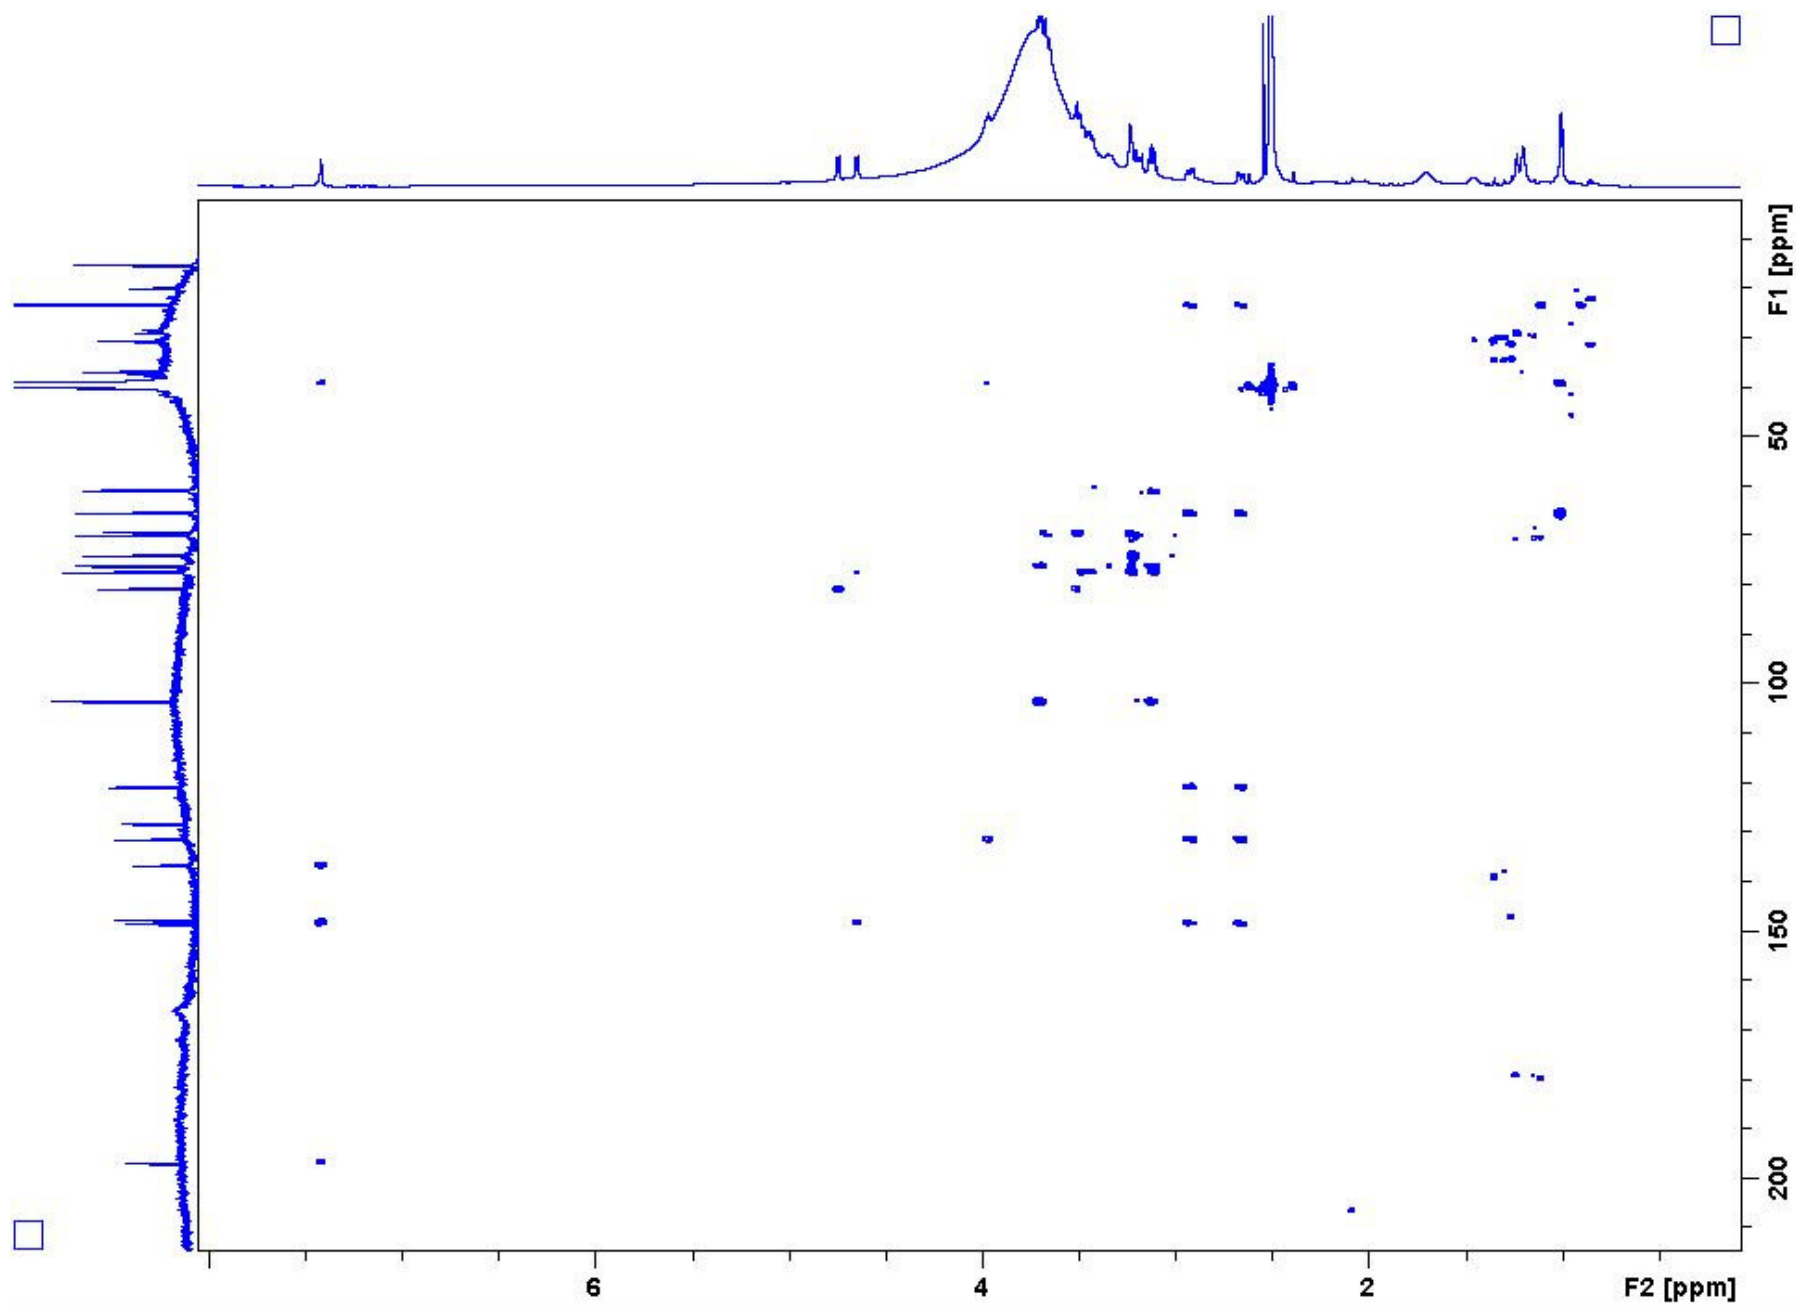

Figure S11-B. HMBC spectrum of compound **2** in DMSO- $d_6$ .

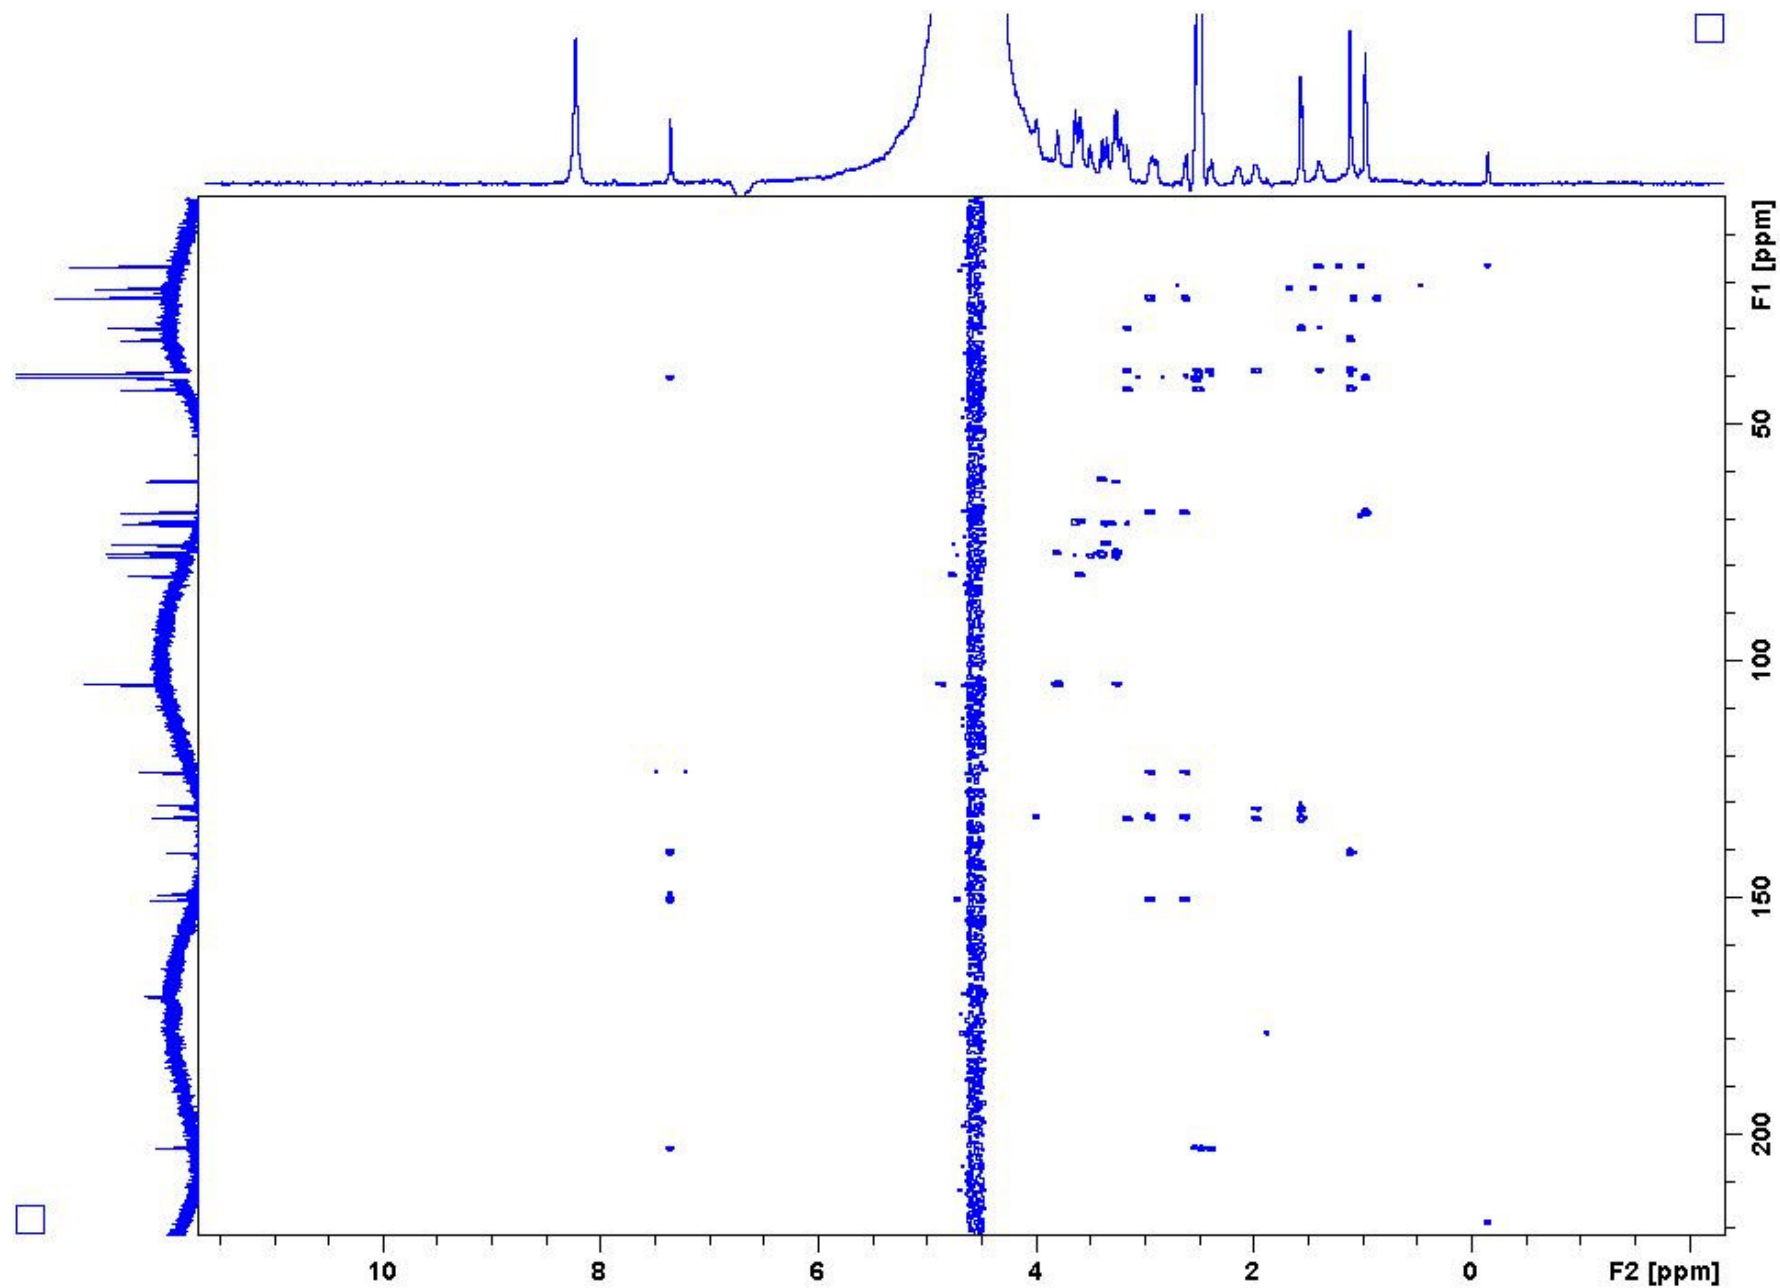

Figure S11-C. HMBC spectrum of compound 2 in D<sub>2</sub>O.

D:\data\extern\2021\01\2675\_Uddin\_JU-CVI-007\_neg\_001.RAW

1/12/2021 10:28:15 AM

NL: 6.05E8  
 2675\_Uddin\_JU-CVI-007\_neg\_001 #3-40  
 RT: 0.05-0.71 AV: 38 NL: 6.05E8  
 T: FTMS - p ESI Full ms  
 [133.4000-2000.0000]

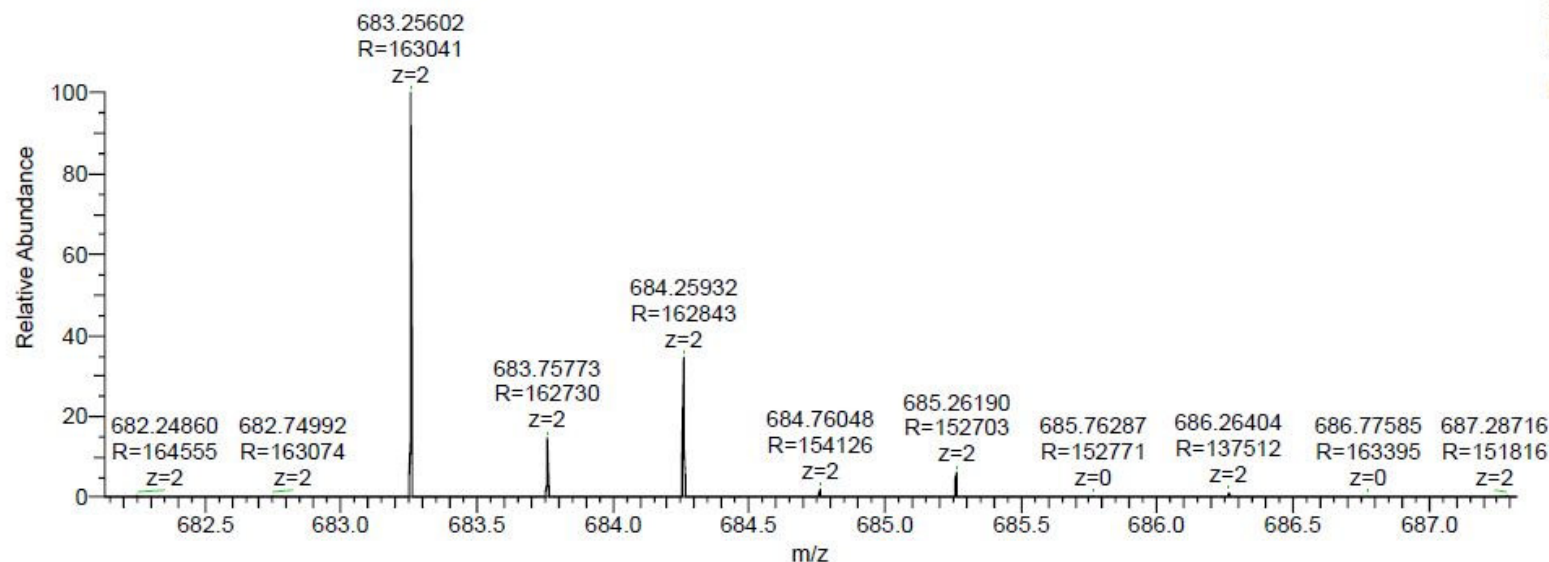

NL: 6.78E5  
 C<sub>32</sub>H<sub>43</sub>O<sub>16</sub> Chrg -1 R: 163041 Res. Pwr.  
 @FWHM

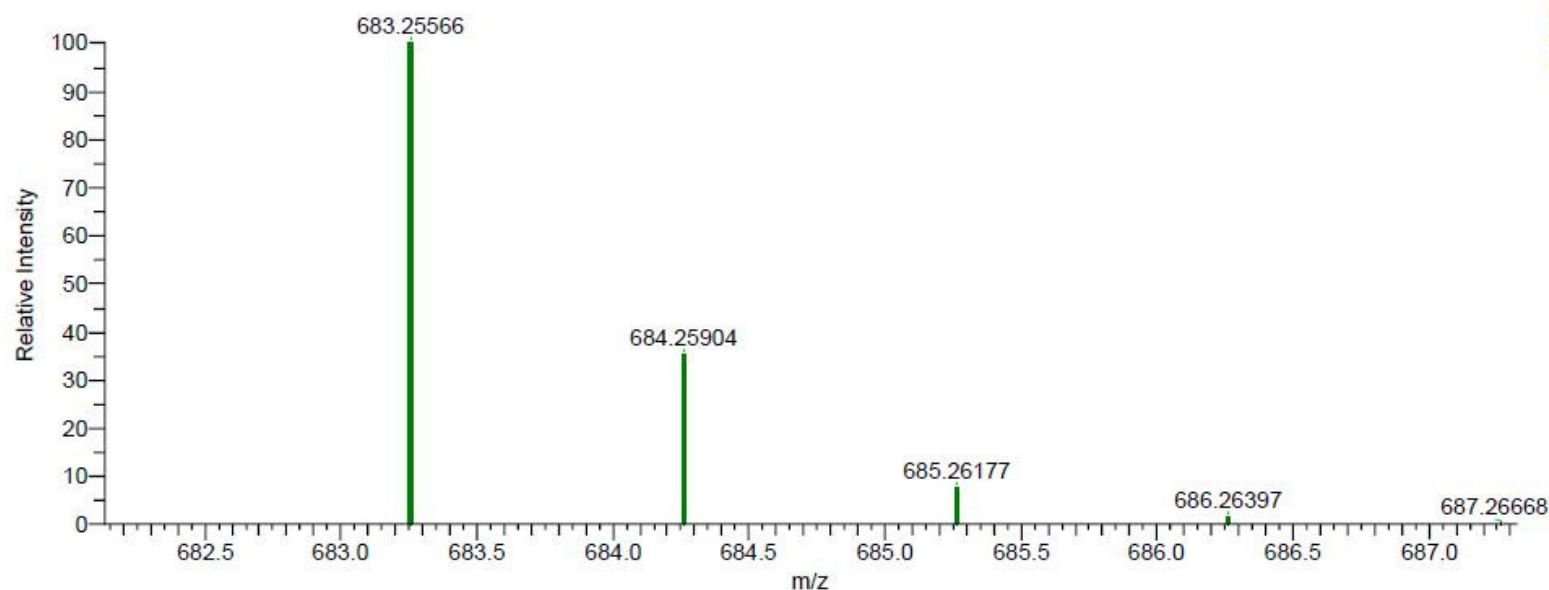

| Peak Mass | Display Form...                                 | Combined Fit | RDB   | Delta [ppm] | Theo. mass | Rank | Combined Sc... | # Matched Iso. | # Missed Iso. | MS Cov. [%] | Pattern Cov. [...] | MSMS Match... |
|-----------|-------------------------------------------------|--------------|-------|-------------|------------|------|----------------|----------------|---------------|-------------|--------------------|---------------|
| 683.25602 | C <sub>32</sub> H <sub>43</sub> O <sub>16</sub> | 100          | 11.50 | 0.54        | 683.25566  | 1    | 0              | 6              | 0             | 0           | 0                  | (Collection)  |

Figure S12. HR mass spectrum of compound **2** in methanol.

D:\data\extern\2021\01\2674\_Uddin\_JU-CVI-005\_neg\_001.RAW

1/12/2021 10:52:35 AM

NL: 4.13E7  
 2674\_Uddin\_JU-CVI-005\_neg\_001 #7-42  
 RT: 0.13-0.75 AV: 35 NL: 1.77E8  
 T: FTMS - p ESI Full ms  
 [133.4000-2000.0000]

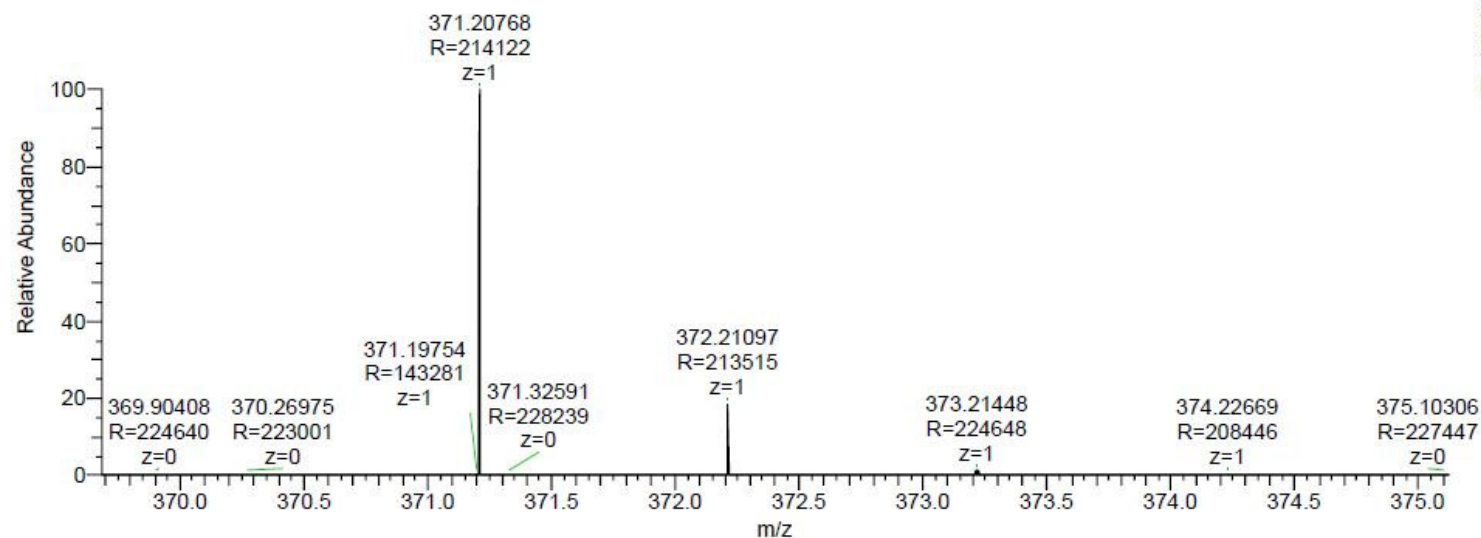

NL: 7.99E5  
 C19H31O7 Chrg -1 R: 214122 Res. Pwr.  
 @FWHM

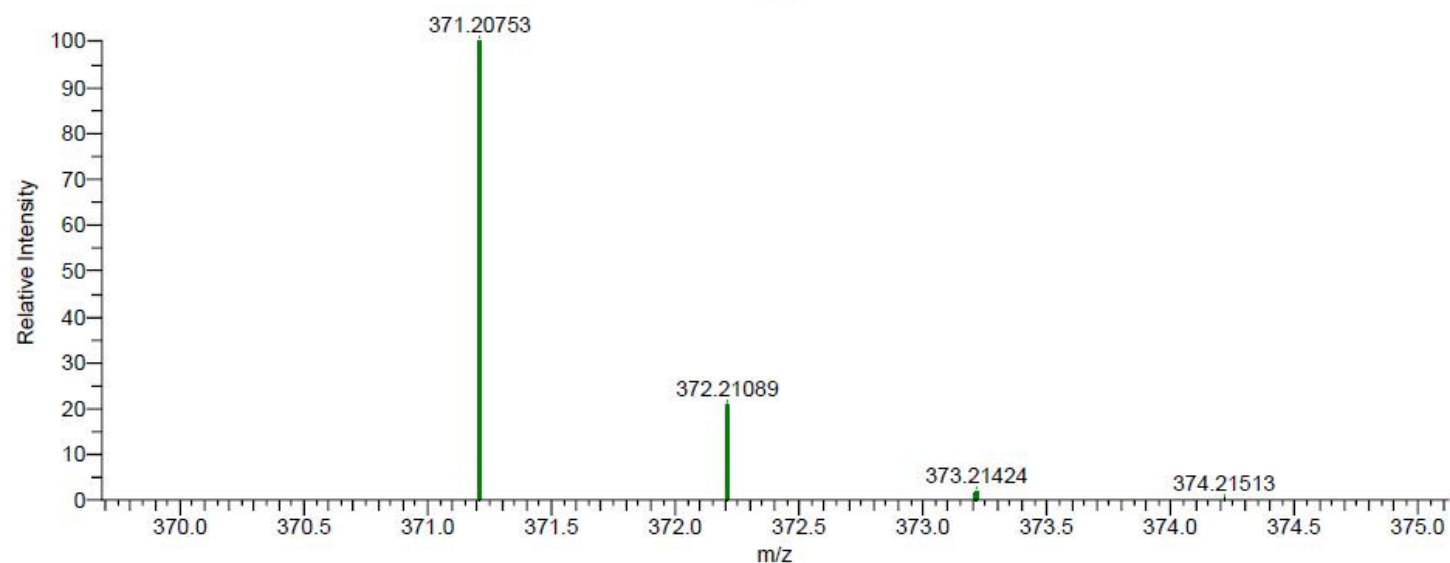

| Peak Mass | Display Form...                                | Combined Fit | RDB  | Delta [ppm] | Theo. mass | Rank | Combined Sc... | # Matched Iso. | # Missed Iso. | MS Cov. [%] | Pattern Cov. [...] | MSMS Match... |
|-----------|------------------------------------------------|--------------|------|-------------|------------|------|----------------|----------------|---------------|-------------|--------------------|---------------|
| 371.20768 | C <sub>19</sub> H <sub>31</sub> O <sub>7</sub> | 100          | 4.50 | 0.42        | 371.20753  | 1    | 0              | 5              | 2             | 0           | 0                  | (Collection)  |

Figure S13. HR mass spectrum of compound **3** in methanol.

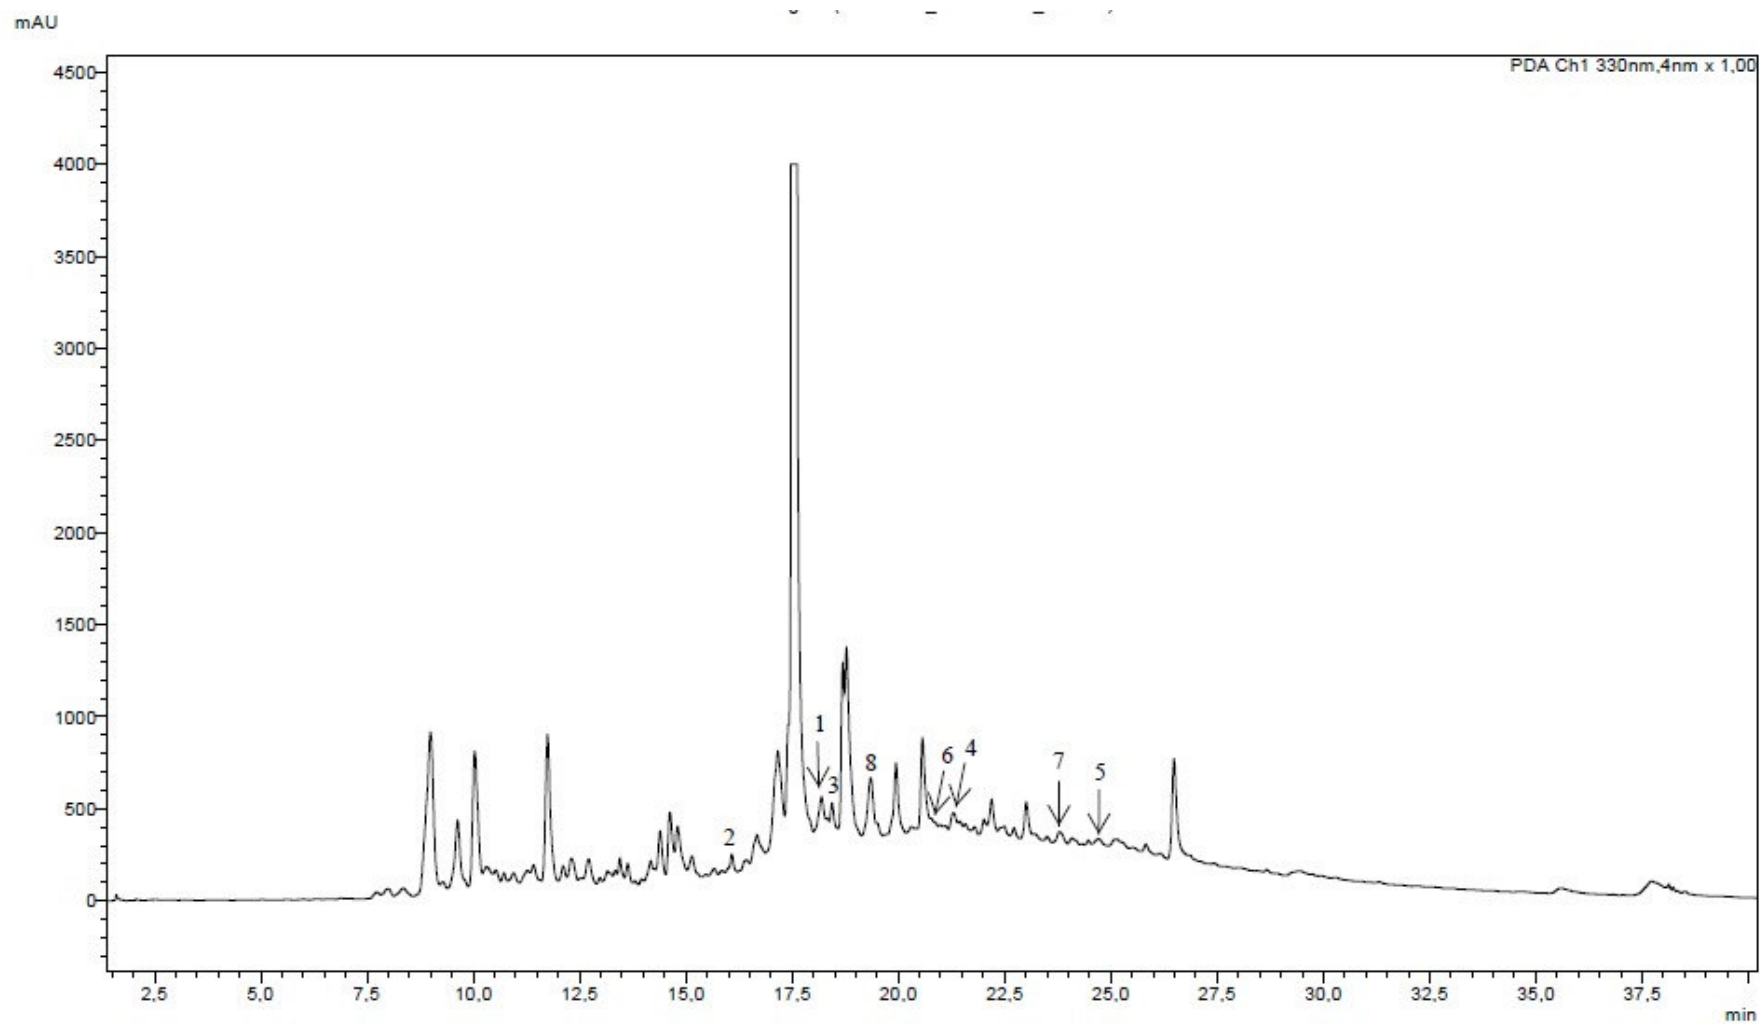

Figure S14. UHPLC ( $\lambda = 330$  nm) chromatogram of *n*-butanol fraction from leaves of *Clerodendrum infortunatum*.

Table S1. 1D ( $^1\text{H}$  and  $^{13}\text{C}$ ) NMR spectroscopic data for compound **3**

|                       | <b>3<sup>a</sup></b>       | <b>3<sup>b</sup></b>       | <b>3<sup>a</sup></b>                           | <b>3<sup>b</sup></b>             |
|-----------------------|----------------------------|----------------------------|------------------------------------------------|----------------------------------|
| Position              | $\delta_{\text{C}}$ , type | $\delta_{\text{C}}$ , type | $\delta_{\text{H}}$ ( $J$ in Hz)               | $\delta_{\text{H}}$ ( $J$ in Hz) |
| cyclohexanone moiety  |                            |                            |                                                |                                  |
| 1                     | 37.3, C                    | 35.9, C                    |                                                |                                  |
| 2                     | 48.1, CH <sub>2</sub>      | 47.0, CH <sub>2</sub>      | 1.97, d (17.5)<br>2.46, d (17.5)               | 1.87, d (17.5)<br>2.34, d (17.5) |
| 3                     | 202.4, C                   | 198.1, C                   |                                                |                                  |
| 4                     | 125.4, CH                  | 124.2, CH                  | 5.80, s                                        | 5.72, s                          |
| 5                     | 170.1, C                   | 166.1, C                   |                                                |                                  |
| 6                     | 52.4, CH                   | 50.1, CH                   | 1.99, m <sup>b</sup>                           | 1.90, t (5.0)                    |
| 7                     | 26.8, CH <sub>2</sub>      | 25.1, CH <sub>2</sub>      | 1.50, m<br>1.98, m <sup>b</sup>                | 1.38, m<br>1.78, m               |
| 8                     | 37.8, CH <sub>2</sub>      | 36.2, CH <sub>2</sub>      | 1.61, m<br>1.67, m                             | 1.50, m                          |
| 9                     | 75.5, CH                   | 73.3, CH                   | 3.88, m                                        | 3.74, dd (12.0, 6.0)             |
| 10                    | 19.9, CH <sub>3</sub>      | 19.5, CH <sub>3</sub>      | 1.18, d (6.0)                                  | 1.1, d (6.0)                     |
| 11                    | 29.1, CH <sub>3</sub>      | 26.8, CH <sub>3</sub>      | 1.01, s                                        | 1.00, s                          |
| 12                    | 27.5, CH <sub>3</sub>      | 28.5, CH <sub>3</sub>      | 1.09, s                                        | 0.97, s                          |
| 13                    | 25.0, CH                   | 24.1, CH                   | 2.05, d (1.0)                                  | 1.97, m                          |
| glucopyranosyl moiety |                            |                            |                                                |                                  |
| 1'                    | 102.1, CH                  | 100.7, CH                  | 4.32, d (8.0)                                  | 4.16, d (8.0)                    |
| 2'                    | 75.2, CH                   | 73.5, CH                   | 3.14, dd (9.0, 8.0)                            | 2.89, t (8.5)                    |
| 3'                    | 78.2, CH                   | 76.9, CH                   | 3.35, dd (9.0, 9.0)                            | 3.12, t (8.5)                    |
| 4'                    | 71.8, CH                   | 70.3, CH                   | 3.26, m                                        | 3.03, m                          |
| 5'                    | 77.9, CH                   | 76.8, CH                   | 3.25, m                                        | 3.05, m                          |
| 6'                    | 62.9, CH <sub>2</sub>      | 61.3, CH <sub>2</sub>      | 3.64, dd (12.00, 5.5)<br>3.85, dd (12.00, 2.0) | 3.41, m<br>3.64, m               |

<sup>a</sup>Spectra were referenced to solvent residual and solvent signals of CD<sub>3</sub>OD at 3.31 ppm ( $^1\text{H}$  NMR, 600 MHz) and 49.0 ppm ( $^{13}\text{C}$  NMR, 150 MHz), respectively.

<sup>b</sup>Spectra were referenced to solvent residual and solvent signals of (CD<sub>3</sub>)<sub>2</sub>SO at 2.50 ppm ( $^1\text{H}$  NMR, 600 MHz) and 39.52 ppm ( $^{13}\text{C}$  NMR, 150 MHz), respectively.
